# Supplementary material
Source: PubMed Central journal article supplement (PMC8919398)
Supplement: NIHMS1778704-supplement-SI.pdf [file NIHMS1778704-supplement-SI.pdf]

## Supporting Information

Dual Nickel/Photoredox-Catalyzed Deaminative Cross-Coupling of Sterically Hindered Primary Amines

Julia R. Dorsheimer, Melissa A. Ashley, Tomislav Rovis

*Department of Chemistry, Columbia University, New York, New York 10027, United States*

### Contents

|                                           |     |
|-------------------------------------------|-----|
| 1. General Information                    | S2  |
| 2. Extended Optimization                  | S3  |
| 3. Starting Material Syntheses            | S5  |
| 4. Product Synthesis and Characterization | S8  |
| 5. Electrochemical Data                   | S16 |
| 6. Kinetics Data                          | S16 |
| 7. UV-Vis Data                            | S22 |
| 8. Spectra                                | S23 |
| 9. References                             | S65 |

## 1. General Information

All reactions were carried out in anhydrous solvents and performed under ambient conditions unless otherwise noted. Commercial reagents and anhydrous solvents were purchased from Sigma-Aldrich and Fisher Scientific. All catalytic reactions were carried out under N<sub>2</sub> in 1dr vials with Teflon caps under irradiation from PR160-456nm Kessil 34W LED lamps. Thin layer chromatography was performed on SiliCycle® 250 μm, 60 Å plates. Visualization was accomplished with 254 nm UV light. Chromatographic purification was accomplished by flash chromatography on SiliCycle® Silica Flash® 40-63 μm, 60 Å or Teledyne ISCO CombiFlash®Rf+ Lumen™ instrument CombiFlash pre-packed columns. Photocatalyst [Ir(dF-CF<sub>3</sub>-ppy)<sub>2</sub>(dtbbpy)]PF<sub>6</sub> A was synthesized according to the reported procedures.

<sup>1</sup>H NMR spectra were recorded on Bruker 400 or 500 MHz spectrometers at ambient temperature. Chemical shift is reported in parts per million (ppm) from CDCl<sub>3</sub> (7.26 ppm) with multiplicity (s = singlet, d = doublet, t = triplet, q = quartet, and m = multiplet) and coupling constants (Hz). <sup>13</sup>C NMR was recorded on Bruker 500 or 400MHz spectrometers (126MHz) at ambient temperature. Chemical shifts are reported in ppm from CDCl<sub>3</sub> (77.16 ppm). Mass spectra (LRMS) were recorded on an Agilent 7890B GC System 5977B MSD GCMS with an EI ionization method. High resolution mass spectra (HRMS) were obtained from Columbia University Mass Spectrometry Facility on a JOEL JMSHZ110HF mass spectrometer using ESI+ /ASAP+ ionization model. Infrared spectra were recorded on a Perkin Elmer Spectrum Two FT-IR spectrometer. All cyclic voltammetry studies were performed on a CH Instruments Model 1232B potentiostat using an EDAQ 1-mm disk glassy carbon working electrode in conjunction with a Ag pseudo reference electrode and a platinum wire from VWR as a counter electrode. The silver pseudo reference electrode was submerged in anhydrous MeCN with 100 mM TBAPF<sub>6</sub> supporting electrolyte and was isolated from bulk solution with a glass frit. Ferrocene was added as a reference after each experiment. *In situ* LED-NMR experiments were performed with Goldstone Marketing LLC Mic-LED-420Z equipped with current controller BLCC-04, fiber coupling adapter FCA-SMA, and fiber patch cord (Extra Long) were purchased.

## 2. Extended Optimization –

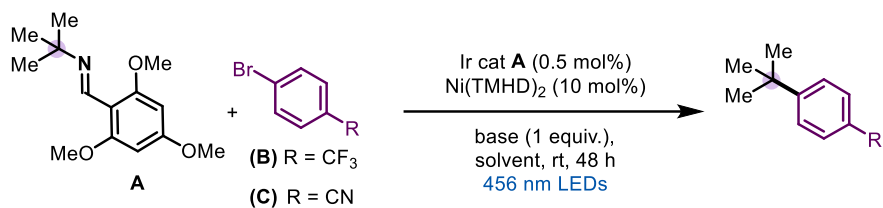

| entry | equiv <b>A</b> | halide (equiv.) | base                            | solvent                  | yield or pdt/IS |
|-------|----------------|-----------------|---------------------------------|--------------------------|-----------------|
| 1     | 1              | <b>B</b> (1.2)  | none                            | DMSO (0.1M)              | 0.35*           |
| 2     | 1              | <b>B</b> (1.2)  | K <sub>2</sub> HPO <sub>4</sub> | DMSO (0.1M)              | 0.39*           |
| 3     | 1              | <b>B</b> (1.2)  | K <sub>2</sub> HPO <sub>4</sub> | DMA (0.1M)               | 0.12*           |
| 4     | 1              | <b>B</b> (1.2)  | K <sub>2</sub> HPO <sub>4</sub> | DMF (0.1M)               | 0.107*          |
| 5     | 1              | <b>B</b> (1.2)  | K <sub>2</sub> HPO <sub>4</sub> | NMP (0.1M)               | 0.0843*         |
| 6     | 1              | <b>B</b> (1.2)  | K <sub>2</sub> HPO <sub>4</sub> | ACN (0.1M)               | 0.1105*         |
| 7     | 1              | <b>B</b> (1.2)  | K <sub>2</sub> HPO <sub>4</sub> | PhCF <sub>3</sub> (0.1M) | 0*              |
| 8     | 1              | <b>C</b> (2)    | K <sub>2</sub> HPO <sub>4</sub> | DMSO (0.1M)              | 25%             |
| 9     | 1              | <b>C</b> (1.2)  | K <sub>2</sub> HPO <sub>4</sub> | DMSO (0.1M)              | 31%             |
| 10    | 1              | <b>C</b> (1.1)  | K <sub>2</sub> HPO <sub>4</sub> | DMSO (0.1M)              | 39%             |
| 11    | 1.2            | <b>C</b> (1)    | K <sub>2</sub> HPO <sub>4</sub> | DMSO (0.1M)              | 39%             |
| 12    | 1.5            | <b>C</b> (1)    | K <sub>2</sub> HPO <sub>4</sub> | DMSO (0.1M)              | 48%             |
| 13    | 2              | <b>C</b> (1)    | K <sub>2</sub> HPO <sub>4</sub> | DMSO (0.1M)              | 58%             |
| 14    | 2              | <b>C</b> (1)    | Cs <sub>2</sub> CO <sub>3</sub> | DMSO (0.1M)              | 28%             |
| 15    | 2              | <b>C</b> (1)    | K <sub>2</sub> CO <sub>3</sub>  | DMSO (0.1M)              | 14%             |
| 16    | 2              | <b>C</b> (1)    | KHCO <sub>3</sub>               | DMSO (0.1M)              | 27%             |
| 17    | 2              | <b>C</b> (1)    | KH <sub>2</sub> PO <sub>4</sub> | DMSO (0.1M)              | 45%             |

a) reactions were carried out on a 0.1 mmol scale according to General Procedure B. Yields or product ratios were determined by GCMS using mesitylene as an internal standard.

## Additive Screening

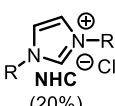

NHC  
(20%)

| additive (10%)              | <i>i</i> PrNHC | MesNHC | <i>t</i> BuNHC | none |
|-----------------------------|----------------|--------|----------------|------|
| MgBr <sub>2</sub>           |                | 71%    |                | 69%  |
| LiBr                        |                | 66%    | 71%            |      |
| <i>n</i> Bu <sub>4</sub> Br |                |        |                |      |
| ZnBr <sub>2</sub>           |                |        |                |      |
| <i>n</i> Bu <sub>4</sub> Cl |                |        |                | 97%  |
| none                        |                | 67%    | 81%            |      |

below 50%  
 50-65%  
 above 65%

all experiments were run on 0.1 mmol scale according to General Procedure B.

## Ligand Screening

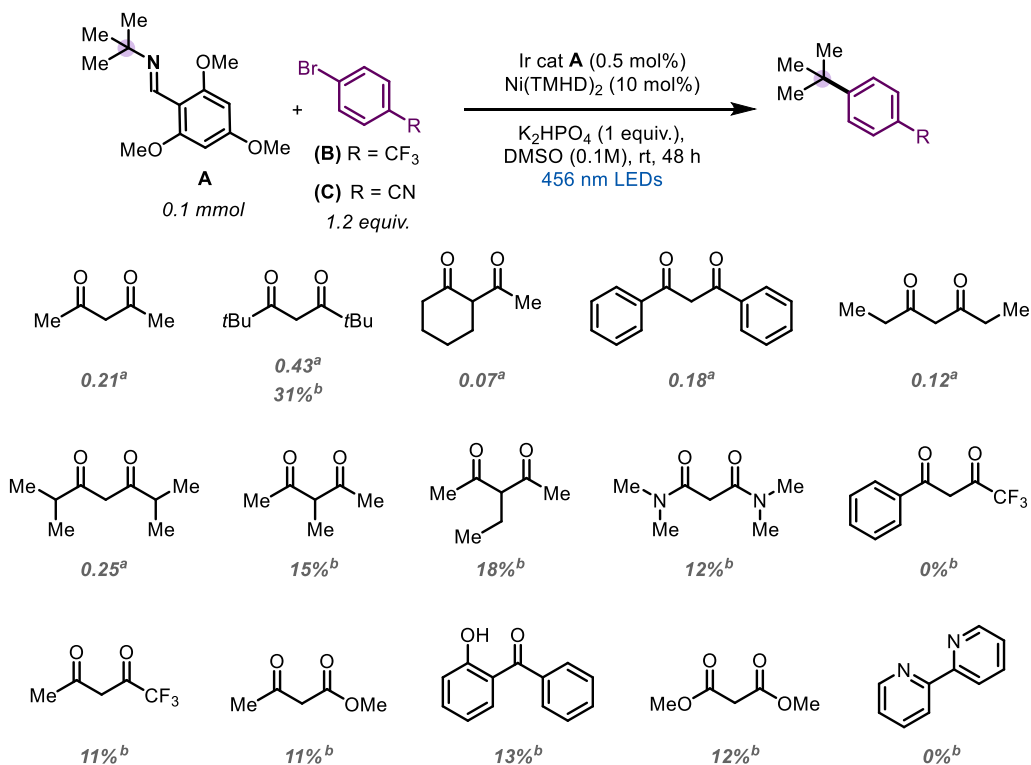

a) product/IS ratios were recorded by GCMS using mesitylene as an internal standard and using aryl halide **B** as the coupling partner. b) yields were recorded by GCMS using mesitylene as an internal standard using aryl halide **C** as the coupling partner.

## Using Electron-rich Aryl Halides:

Electron-rich aryl bromides were not suitable coupling partners under these reaction conditions. Using them resulted in the majority of the starting material remaining. Below is a photo of the standard reaction conditions with 4-MeObromobenzene (left) and 4-MeOiodobenzene (right) as coupling partners. As evidenced, the nickel catalyst becomes deactivated, resulting in nickel black formation. We observe around 5% of the chlorinated arene and 10% of protodehalogenation when using electron-rich aryl iodides, indicating that oxidative addition can occur, but reductive elimination is also decelerated. This is consistent with outer-sphere reductive elimination via the polarity mismatch of the electron-rich, nucleophilic, tertiary alkyl radical and the electron-rich arene.

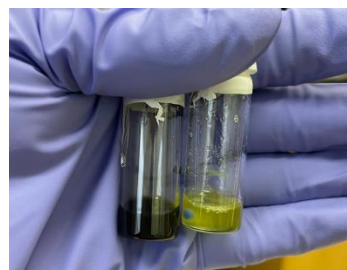

Additional electron-rich aryl iodides:

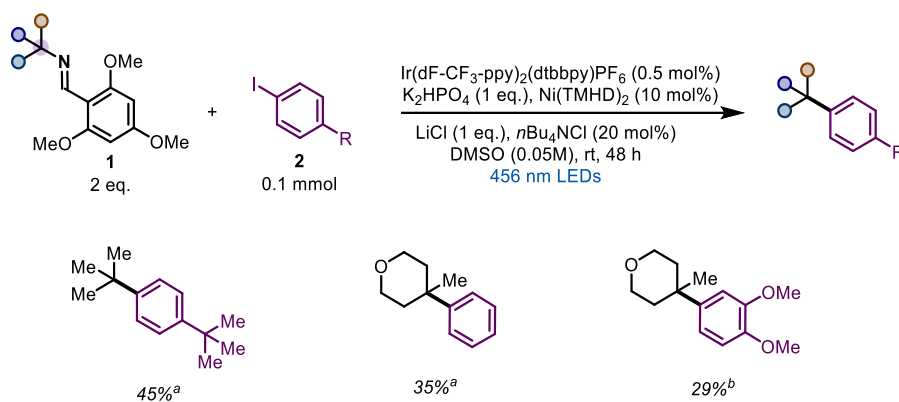

a. NMR yields with mesitylene as an internal standard. b. isolated yield.

## 3. Starting Material Synthesis –

The following imines were synthesized according to a known literature procedure.<sup>1</sup>

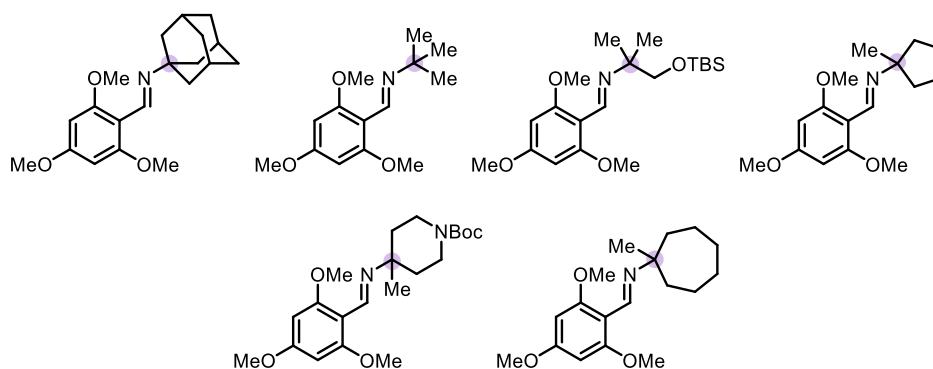

## General Procedure A – Synthesis of Imines

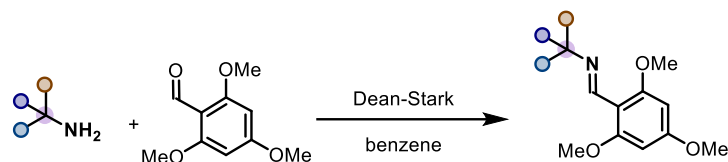

Imines were synthesized according to a modified literature procedure.<sup>1</sup> A mixture of 2,4,6-trimethoxybenzaldehyde (1.0 equiv.) and primary amine (1.1 equiv. or 2.0 equiv. if volatile) in benzene (0.1M) was heated in a Dean-Stark apparatus to reflux overnight. The reaction was then cooled, dried with  $\text{Na}_2\text{SO}_4$ , filtered, and concentrated *in vacuo*. Volatile amines were pumped off and/or able to be washed away with hexanes, in which the imine would crash out (additional cooling sometimes required). Imines carried forward without further purification (95-100% purity).

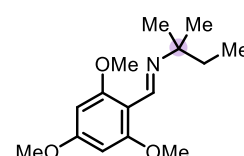

**N-tert-pentyl-1-(2,4,6-trimethoxyphenyl)methanimine.** Synthesized according to General Procedure A from commercially available *tert*-amyl amine (1.34 mL, 11.47 mmol) and 2,4,6-trimethoxybenzaldehyde (1.125g, 5.74 mmol). Light yellow solid (1.47g, 96%).  $^1\text{H NMR}$  (500 MHz,  $\text{CDCl}_3$ )  $\delta$  8.28 (s, 1H), 6.11 (s, 2H), 3.81 (s, 3H), 3.79 (s, 6H), 1.63 (q,  $J = 7.5$  Hz, 2H), 1.23 (s, 6H), 0.87 (t,  $J = 7.4$  Hz, 3H).  $^{13}\text{C NMR}$  (126 MHz,  $\text{CDCl}_3$ )  $\delta$  161.87, 160.22, 151.10, 90.98, 60.42, 56.08, 55.45, 36.14, 26.86, 8.63. **IR** ( $\text{CDCl}_3$ ): 2963.76, 1677.11, 1638.72, 1580.12, 1456.18, 1332.51, 1227.12, 1155.25, 1036.27, 952.91, 812.14  $\text{cm}^{-1}$ . **HRMS-ESI** (positive)  $M = \text{C}_{15}\text{H}_{23}\text{NO}_3$ : calculated (M+H)<sup>+</sup>  $m/z$  267.1756; found (M+H)<sup>+</sup>  $m/z$  266.1767.

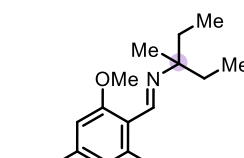

**N-(3-methylpentan-3-yl)-1-(2,4,6-trimethoxyphenyl)methanimine.** Synthesized according to General Procedure A from 3-methylpentan-3-aminium chloride (0.500g, 3.63 mmol), prepared according to a literature procedure,<sup>2</sup> 2,4,6-trimethoxybenzaldehyde (0.475 g, 2.42 mmol), and crushed potassium hydroxide (0.203 g, 3.63 mmol). Light yellow solid (0.501g, 74%).  $^1\text{H NMR}$  (300 MHz,  $\text{CDCl}_3$ )  $\delta$  8.20 (s, 1H), 6.12 (s, 2H), 3.82 (s, 3H), 3.79 (s, 6H), 1.61 (m, 4H), 1.16 (s, 3H), 0.85 (t,  $J = 7.5$  Hz, 6H).  $^{13}\text{C NMR}$  (126 MHz,  $\text{CDCl}_3$ )  $\delta$  166.22, 164.13, 159.94, 151.55, 90.80, 62.86, 55.96, 55.34, 33.97, 20.79, 8.11. **IR** ( $\text{CDCl}_3$ ): 2964.59, 2936.73, 1678.88, 1639.46, 1604.78, 1456.68, 1413.46, 1332.24, 1206.21, 1154.74, 1127.75, 953.06, 811.26  $\text{cm}^{-1}$ . **HRMS-ESI** (positive)  $M = \text{C}_{15}\text{H}_{26}\text{NO}_3$ : calculated (M+H)<sup>+</sup>  $m/z$  281.1952; found (M+H)<sup>+</sup>  $m/z$  281.1956.

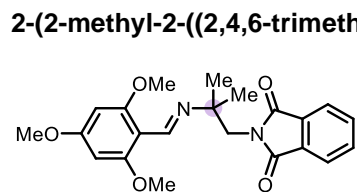

**2-(2-methyl-2-((2,4,6-trimethoxybenzylidene)amino)propyl)isoindoline-1,3-dione.** Prepared according to General Procedure A from 2-(2-amino-2-methylpropyl)isoindoline-1,3-dione (0.255g, 1.17 mmol), prepared according to a literature procedure,<sup>3</sup> and 2,4,6-trimethoxybenzaldehyde (0.218g, 1.115 mmol). Tan solid (0.282g, 64%).  $^1\text{H NMR}$  (500 MHz,  $\text{CDCl}_3$ )  $\delta$  8.49 (s, 1H), 7.89 – 7.81 (m, 2H), 7.74 – 7.67 (m, 2H), 6.08 (s, 2H), 3.88 (d,  $J = 6.1$  Hz, 2H), 3.81 (s, 3H), 3.75 (s, 6H), 1.33 (s, 6H).  $^{13}\text{C NMR}$  (126 MHz,  $\text{CDCl}_3$ )  $\delta$  168.80, 162.33, 160.64, 153.26, 133.87, 132.46, 123.27, 108.31, 90.85, 62.23, 56.01, 55.44, 48.86, 26.27. **IR** ( $\text{CDCl}_3$ ): 2969.07, 1774.62, 1713.33, 1603.12, 1465.05, 1393.83, 1333.73, 1227.25, 1206.83, 1156.29, 1126.37, 1035.72, 911.74, 726.91  $\text{cm}^{-1}$ . **HRMS-ESI** (positive)  $M = \text{C}_{22}\text{H}_{24}\text{N}_2\text{O}_2$ : calculated (M+H)<sup>+</sup>  $m/z$  398.1796; found (M+H)<sup>+</sup>  $m/z$  398.1800.

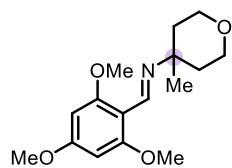

**N-(4-methyltetrahydro-2H-pyran-4-yl)-1-(2,4,6-trimethoxyphenyl)methanimine.** Synthesized according to General Procedure A from commercially available 4-methyltetrahydro-2H-pyran-4-aminium chloride (0.500 g, 3.3 mmol), 2,4,6-trimethoxybenzaldehyde (0.431 g, 2.2 mmol), and crushed potassium hydroxide (0.185 g, 3.3 mmol). White solid (0.652 g, 99%). <sup>1</sup>H NMR (500 MHz, CDCl<sub>3</sub>) δ 8.49 (s, 1H), 6.14 (s, 2H), 3.92 – 3.85 (m, 2H), 3.84 (s, 3H), 3.83 (s, 6H), 3.75 (m, 2H), 1.95 – 1.83 (m, 2H), 1.78 (m, 2H), 1.27 (s, 3H). <sup>13</sup>C NMR (126 MHz, CDCl<sub>3</sub>) δ 162.18, 160.31, 153.01, 108.54, 90.82, 64.46, 55.98, 55.34, 40.67, 39.27, 27.55. IR (CDCl<sub>3</sub>): 2937.63, 2863.53, 1604.04, 1581.82, 1455.95, 1414.44, 1332.97, 1206.00, 1155.53, 1126.27, 1033.27, 907.78, 812.25, 728.93 cm<sup>-1</sup>. HRMS-ESI (positive) M = C<sub>16</sub>H<sub>23</sub>NO<sub>4</sub>: calculated (M+H)<sup>+</sup> m/z 295.1738; found (M+H)<sup>+</sup> m/z 295.1732.

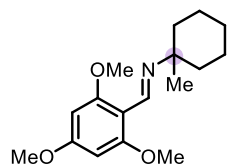

**N-(1-methylcyclohexyl)-1-(2,4,6-trimethoxyphenyl)methanimine.** Prepared according to General Procedure A from 1-methylcyclohexan-1-aminium chloride (600 mg, 4.0 mmol), crush potassium hydroxide (224 mg, 4.0 mmol), and 2,4,6-trimethoxybenzaldehyde (524 mg, 2.67 mmol). Light yellow solid (724 mg, 93%). <sup>1</sup>H NMR (500 MHz, CDCl<sub>3</sub>) δ 8.40 (s, 1H), 6.11 (s, 2H), 3.82 (s, 3H), 3.80 (s, 6H), 1.82 (s, 2H), 1.68 – 1.53 (m, 4H), 1.50 – 1.46 (m, 4H), 1.18 (s, 3H). <sup>13</sup>C NMR (101 MHz, C<sub>6</sub>D<sub>6</sub>) δ 161.90, 160.26, 151.91, 109.34, 91.06, 59.33, 56.10, 55.40, 38.77, 27.74, 26.36, 22.63, 21.91. IR (CDCl<sub>3</sub>): 2927.49, 2852.68, 1604.20, 1582.11, 1454.64, 1413.34, 1332.31, 1205.91, 1154.80, 1126.42, 1038.60, 811.96 cm<sup>-1</sup>. HRMS-ESI (positive) M = C<sub>17</sub>H<sub>25</sub>NO<sub>3</sub>: calculated (M+H)<sup>+</sup> m/z 292.1913; found (M+H)<sup>+</sup> m/z 292.1938.

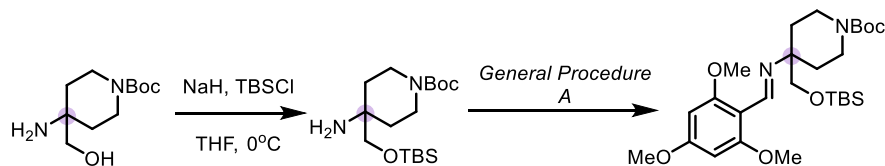

**tert-butyl 4-(((tert-butyldimethylsilyloxy)methyl)-4-((2,4,6-trimethoxybenzylidene)amino)piperidine-1-carboxylate.** In a flamed-dried schlenk flask under N<sub>2</sub> was added dry THF (10 mL) and NaH (76.0, 1.901 mmol). The solution was cooled to 0°C and tert-butyl 4-amino-4-(hydroxymethyl)piperidine-1-carboxylate (438 mg, 1.901 mmol), synthesized by a literature procedure,<sup>4</sup> in dry THF (5 mL) was added dropwise. The solution stirred for one hour at rt. The solution was cooled again to 0°C and a solution of TBSCl (287 mg, 1.901 mmol) in THF (3 mL) was added dropwise and the solution was allowed to stir for 3 hours at rt. Methanol (~10 mL) was added slowly, then extracted (3x) with hexanes and water, washed with brine, dried with MgSO<sub>4</sub> and concentrated to afford TBS protected alcohol. The imine was synthesized according to General Procedure A from the amine (200 mg, 0.580 mmol) and 2,4,6-trimethoxybenzaldehyde (0.109g, 0.527 mmol). Clear oil (0.234g, 85%). <sup>1</sup>H NMR (500 MHz, CDCl<sub>3</sub>) δ 8.46 (s, 1H), 6.11 (s, 2H), 3.83 (s, 3H), 3.79 (s, 6H), 3.50 (s, 2H), 3.11 (m, 2H), 1.91 (m, 2H), 1.72 – 1.69 (m, 2H), 1.46 (s, 9H), 1.32 – 1.24 (m, 2H), 0.88 (s, 9H), 0.02 (s, 6H). <sup>13</sup>C NMR (126 MHz, CDCl<sub>3</sub>) δ 162.25, 160.42, 155.92, 155.26, 108.70, 90.76, 79.20, 69.12, 61.62, 55.98, 55.47, 34.81, 31.74, 28.66, 26.01, 22.80, 18.44, 14.28, -5.40. IR (CDCl<sub>3</sub>): 2928.72, 2855.40, 1689.17, 1603.87, 1462.28, 1415.79, 1364.46, 1277.06, 1247.80, 1128.15, 1156.59, 1090.01, 837.49, 776.36 cm<sup>-1</sup>. HRMS-ESI (positive) M = C<sub>26</sub>H<sub>47</sub>N<sub>2</sub>O<sub>6</sub>Si: calculated (M+H)<sup>+</sup> m/z 523.3203; found (M+H)<sup>+</sup> m/z 523.3217.

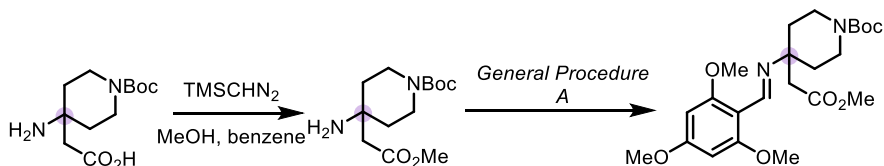

**tert-butyl 4-(2-methoxy-2-oxoethyl)-4-((2,4,6-trimethoxybenzylidene)amino)piperidine-1-carboxylate.** To a 50 mL round bottom flask was added 2-(4-amino-1-(tert-butoxycarbonyl)piperidin-4-yl)acetic acid (450 mg, 1.742 mmol). The flask was evacuated and backfilled with nitrogen (3x), and dry MeOH (7 mL) and benzene (7 mL) was added. The solution was cooled to 0°C and TMS diazomethane (2M in hexanes) was added dropwise (1.742 mL, 3.484 mmol). The solution was allowed to stir overnight at rt, then concentrated. The residue was redissolved in EtOAc and 1N NaOH was added. The organic layer was washed with 1N NaOH, water, brine, and dried with MgSO<sub>4</sub> then concentrated to yield the methyl ester (0.317 g, 67%). The imine was synthesized according to General Procedure A from the amine (340 mg, 1.248 mmol) and 2,4,6-trimethoxybenzaldehyde (223 mg, 1.135 mmol). Clear oil (0.540g, 99%). **<sup>1</sup>H NMR** (400 MHz, CDCl<sub>3</sub>) δ 8.43 (s, 1H), 6.10 (s, 2H), 3.81 (s, 3H), 3.78 (s, 6H), 3.74 (m, 2H), 3.61 (s, 3H), 3.20 (m, 2H), 2.58 (s, 2H), 2.02 (m, 2H), 1.83 (m, 2H), 1.45 (s, 9H). **<sup>13</sup>C NMR** (101 MHz, CDCl<sub>3</sub>) δ 171.30, 164.23, 162.57, 160.49, 155.19, 108.23, 90.89, 79.31, 59.44, 56.07 (d, *J* = 5.9 Hz), 55.45, 51.41, 49.23, 47.37, 45.27, 37.68, 28.57. **IR** (CDCl<sub>3</sub>): 2939.66, 1731.57, 1682.86, 1601.92, 1454.45, 1414.70, 1228.68, 1152.70, 1022.56, 973.45, 814.40 cm<sup>-1</sup>. **HRMS-ESI** (positive) *M* = C<sub>23</sub>H<sub>34</sub>N<sub>2</sub>O<sub>7</sub>: calculated (M+H)<sup>+</sup> *m/z* 451.2444; found (M+H)<sup>+</sup> *m/z* 451.2448.

**N-((1*r*,3*R*,5*S*,7*r*)-3,5-dimethyladamantan-1-yl)-1-(2,4,6-trimethoxyphenyl)methanimine.** Prepared according to General Procedure A from Memantine (0.518g, 2.89 mmol), obtained through a basic wash of commercially available Memantine hydrochloride, and 2,4,6-trimethoxybenzaldehyde (0.540g, 2.75 mmol). White solid (0.960g, 98%). **<sup>1</sup>H NMR** (500 MHz, CDCl<sub>3</sub>) δ 8.38 (s, 1H), 6.11 (s, 2H), 3.82 (s, 3H), 3.79 (s, 6H), 2.22 (p, *J* = 3.1 Hz, 1H), 1.71 – 1.66 (m, 2H), 1.50 – 1.31 (m, 8H), 1.20 – 1.17 (m, 2H), 0.89 (s, 6H). **<sup>13</sup>C NMR** (126 MHz, CDCl<sub>3</sub>) δ 161.94, 160.41, 150.54, 109.15, 91.09, 60.06, 56.22, 55.45, 51.10, 49.43, 43.15, 41.80, 32.64, 30.64, 30.58. **IR** (CDCl<sub>3</sub>): 2941.61, 2900.74, 1603.93, 1454.47, 1412.65, 1330.95, 1227.91, 1206.31, 1155.86, 1128.06, 910.34, 812.82, 730.16 cm<sup>-1</sup>. **HRMS-ESI** (positive) *M* = C<sub>22</sub>H<sub>31</sub>NO<sub>3</sub>: calculated (M+H)<sup>+</sup> *m/z* 359.2415; found (M+H)<sup>+</sup> *m/z* 359.2417.

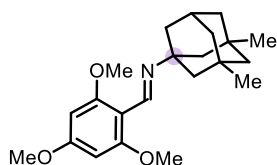

#### 4. Product Synthesis and Characterization –

##### General Procedure B - Deaminative arylation

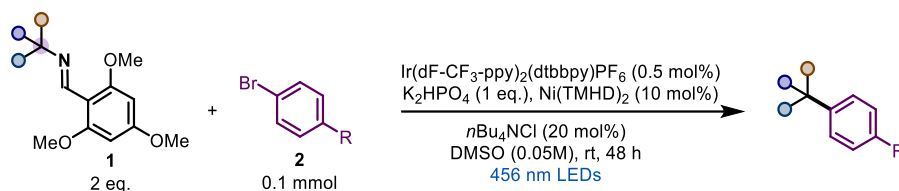

To a 1-dram vial equipped with a stir bar was added aryl bromide (0.1 mmol, 1 equiv), imine (0.2 mmol, 2 equiv), [Ir(dF-CF<sub>3</sub>-ppy)<sub>2</sub>dtbbpy]PF<sub>6</sub> (0.5 mol%), and *n*Bu<sub>4</sub>NCl (5.54 mg, 20 mol%). The vial was then taken to a dry-glovebox and Ni(TMHD)<sub>2</sub> (4.25 mg, 10 mol%) and K<sub>2</sub>HPO<sub>4</sub> (17.4 mg, 0.1 mmol, 1 equiv) were added (base can be added outside of the glovebox with the same result). DMSO (0.05 M) was added under an atmosphere of nitrogen. The vials were sealed with Teflon tape and illuminated with a Blue LED (Kessil, 34 W, 456 nm) for 48 h (a fan was set up to maintain room temperature). The reactions were then exposed to air and quenched with water, extracted with EtOAc (2x), washed with brine, and concentrated *in vacuo*. The crude mixture was then subjected to flash silica gel chromatography.

**Note:** if humidity levels are high, *n*Bu<sub>4</sub>NCl should be stored in a dry atmosphere (in a desiccator or glovebox) to maintain yields.



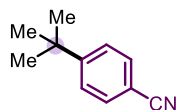

**4-(*tert*-butyl)benzonitrile.** Prepared according to General Procedure B from *N-tert*-butyl-1-(2,4,6-trimethoxyphenyl)methanimine (50.2 mg, 0.2 mmol) and 4-bromobenzonitrile (18.2 mg, 0.1 mmol). Colorless oil (14.9 mg, 94%). **1.0 mmol scale:** Prepared according to General Procedure B from *N-tert*-butyl-1-(2,4,6-trimethoxyphenyl)methanimine (502 mg, 2.0 mmol) and 4-bromobenzonitrile (182.0 mg, 1.0 mmol) and set up in a 50 mL schlenk tube, then irradiated with two 456-nm Kessil lamps. Yield (128.2 mg, 80%). **<sup>1</sup>H NMR** (500 MHz, CDCl<sub>3</sub>) δ 7.61 – 7.56 (m, 2H), 7.51 – 7.46 (m, 2H), 1.34 (s, 9H). **<sup>13</sup>C NMR** (126 MHz, CDCl<sub>3</sub>) δ 156.86, 132.14, 126.32, 119.19, 109.70, 35.44, 31.12.

Spectroscopic data matches with previously reported data.<sup>5</sup>

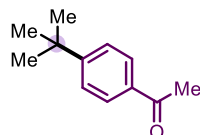

**1-(4-(*tert*-butyl)phenyl)ethan-1-one.** Prepared according to General Procedure B from *N-tert*-butyl-1-(2,4,6-trimethoxyphenyl)methanimine (50.2 mg, 0.2 mmol) and 1-(4-bromophenyl)ethan-1-one (19.9 mg, 0.1 mmol). Colorless oil (15.8 mg, 90%). **<sup>1</sup>H NMR** (500 MHz, CDCl<sub>3</sub>) δ 7.90 (d, *J* = 8.6 Hz, 2H), 7.48 (d, *J* = 8.6 Hz, 2H), 2.59 (s, 3H), 1.34 (s, 9H). **<sup>13</sup>C NMR** (126 MHz, CDCl<sub>3</sub>) δ 198.03, 156.98, 134.77, 128.44, 125.65, 35.26, 31.24, 26.71.

Spectroscopic data matches with previously reported data.<sup>5</sup>

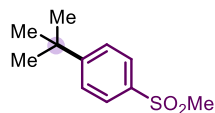

**1-(*tert*-butyl)-4-(methylsulfonyl)benzene.** Prepared according to General Procedure B from *N-tert*-butyl-1-(2,4,6-trimethoxyphenyl)methanimine (50.2 mg, 0.2 mmol) and 1-bromo-4-(methylsulfonyl)benzene (23.5 mg, 0.1 mmol). White solid (18.1 mg, 86%). **<sup>1</sup>H NMR** (500 MHz, CDCl<sub>3</sub>) δ 7.86 (d, *J* = 8.6 Hz, 2H), 7.58 (d, *J* = 8.7 Hz, 2H), 3.04 (s, 3H), 1.35 (s, 9H). **<sup>13</sup>C NMR** (126 MHz, CDCl<sub>3</sub>) δ 157.77, 137.74, 127.37, 126.49, 44.72, 35.40, 31.20.

Spectroscopic data matches with previously reported data.<sup>5,6</sup>

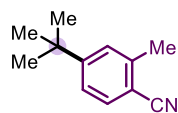

**4-(*tert*-butyl)-2-methylbenzonitrile.** Prepared according to General Procedure B from *N-tert*-butyl-1-(2,4,6-trimethoxyphenyl)methanimine (50.2 mg, 0.2 mmol) and 4-bromo-2-methylbenzonitrile (19.6 mg, 0.1 mmol). Colorless oil (15.1 mg, 87%). **<sup>1</sup>H NMR** (500 MHz, CDCl<sub>3</sub>) δ 7.52 (d, *J* = 8.1 Hz, 1H), 7.31 (d, *J* = 0.7 Hz, 1H), 7.29 – 7.27 (m, 1H), 2.54 (s, 3H), 1.31 (s, 9H). **<sup>13</sup>C NMR** (126 MHz, CDCl<sub>3</sub>) δ 156.47, 141.58, 132.30, 127.29, 123.43, 118.51, 109.72, 35.11, 30.97, 20.73. **IR** (CDCl<sub>3</sub>): 2964.47, 2870.72, 2221.80, 1723.01, 1607.89, 1461.78, 1397.14, 1364.82, 1266.90, 1206.63, 1131.48, 904.46, 830.26, 730.36, 649.75, 617.72, 511.70, 443.48 cm<sup>-1</sup>. **HRMS-ESI** (positive) *M* = C<sub>12</sub>H<sub>15</sub>N: calculated (*M*+*H*)<sup>+</sup> *m/z* 174.1283; found (*M*+*H*)<sup>+</sup> *m/z* 174.1289.

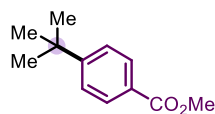

**methyl 4-(*tert*-butyl)benzoate.** Prepared according to General Procedure B from *N-tert*-butyl-1-(2,4,6-trimethoxyphenyl)methanimine (50.2 mg, 0.2 mmol) and methyl 4-bromobenzoate (21.5 mg, 0.1 mmol). Colorless oil (13.6 mg, 71%). **<sup>1</sup>H NMR** (500 MHz, CDCl<sub>3</sub>) δ 7.97 (d, *J* = 8.8 Hz, 2H), 7.45 (d, *J* = 8.8 Hz, 2H), 3.90 (s, 3H), 1.34 (s, 9H). **<sup>13</sup>C NMR** (126 MHz, CDCl<sub>3</sub>) δ 167.31, 156.70, 129.59, 127.54, 125.49, 52.10, 35.23, 31.27.

Spectroscopic data matches with previously reported data.<sup>6</sup>

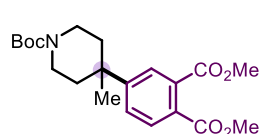

**dimethyl 4-(1-(*tert*-butoxycarbonyl)-4-methylpiperidin-4-yl)phthalate.** Prepared according to General Procedure B from *tert*-butyl-4-methyl-4-((2,4,6-trimethoxybenzylidene)amino)piperidine-1-carboxylate (78.4 mg, 0.2 mmol) and dimethyl 4-bromophthalate (27.3 mg, 0.1 mmol). Light yellow oil (13.3 mg, 60%). **R<sub>f</sub>** : 0.3 in 30% EtOAc/hexanes. **<sup>1</sup>H NMR** (400 MHz, CDCl<sub>3</sub>) δ 7.72 (d, *J* = 8.2 Hz, 1H), 7.64 (d, *J* = 2.1 Hz, 1H), 7.49 (dd, *J* = 8.3, 2.1 Hz, 1H), 3.91 (s, 3H), 3.89 (s, 3H), 3.44 (tdd, *J* = 11.7, 9.4, 3.9 Hz, 4H), 2.18 – 1.93 (m, 2H), 1.76 – 1.63 (m, 2H), 1.44 (s, 9H), 1.27 (s, 3H). **<sup>13</sup>C NMR** (101 MHz, CDCl<sub>3</sub>) δ 168.49, 167.70, 154.86, 152.35, 132.62, 129.37, 129.16, 128.39, 126.25, 79.51, 52.68, 52.57, 36.90, 36.54, 28.44, 28.33. **IR** (CDCl<sub>3</sub>): 2952.41, 1727.26, 1687.95, 1605.90, 1430.55, 1365.56, 1278.19, 1249.91, 1213.69, 1166.53, 1128.96, 1091.68, 1066.99, 966.12, 906.27, 861.92, 790.35, 772.02, 729.68,

647.96  $\text{cm}^{-1}$ . **HRMS-ESI** (positive)  $M = \text{C}_{21}\text{H}_{29}\text{NO}_6$ : calculated  $(M+H)^+$   $m/z$  393.2132; found  $(M+H)^+$   $m/z$ , 393.2374.

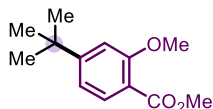

**methyl 4-(tert-butyl)-2-methoxybenzoate.** Prepared according to General Procedure B from *N*-tert-butyl-1-(2,4,6-trimethoxyphenyl)methanimine (50.2 mg, 0.2 mmol) and methyl 4-bromo-2-methoxybenzoate (24.5 mg, 0.1 mmol). Colorless oil (17.8 mg, 80%).  **$^1\text{H NMR}$**  (500 MHz,  $\text{CDCl}_3$ )  $\delta$  7.75 (d,  $J = 8.1$  Hz, 1H), 7.03 – 6.96 (m, 2H), 3.92 (s, 3H), 3.87 (s, 3H), 1.33 (s, 9H).  **$^{13}\text{C NMR}$**  (126 MHz,  $\text{CDCl}_3$ )  $\delta$  166.74, 159.33, 157.87, 131.67, 117.56, 117.21, 109.52, 56.12, 51.99, 35.43, 31.23.

Spectroscopic data matches with previously reported data.<sup>6</sup>

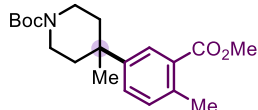

**tert-butyl 4-(3-(methoxycarbonyl)-4-methylphenyl)-4-methylpiperidine-1-carboxylate.** Prepared according to General Procedure B from *tert*-butyl-4-methyl-4-((2,4,6-trimethoxybenzylidene)amino)piperidine-1-carboxylate (78.4 mg, 0.2 mmol) and methyl 5-bromo-2-methylbenzoate (22.9 mg, 0.1 mmol). Colorless oil

(12.7 mg, 37%).  **$^1\text{H NMR}$**  (500 MHz,  $\text{CDCl}_3$ )  $\delta$  7.86 (d,  $J = 2.3$  Hz, 1H), 7.36 (dd,  $J = 8.0, 2.3$  Hz, 1H), 7.21 (d,  $J = 8.0$  Hz, 1H), 3.89 (s, 3H), 3.48 (ddd,  $J = 13.7, 7.8, 3.6$  Hz, 2H), 3.37 (ddd,  $J = 13.7, 7.7, 3.7$  Hz, 2H), 2.56 (s, 3H), 2.05 (ddd,  $J = 11.6, 8.0, 3.8$  Hz, 2H), 1.68 (ddd,  $J = 13.8, 7.7, 3.8$  Hz, 2H), 1.45 (s, 9H), 1.25 (s, 3H).  **$^{13}\text{C NMR}$**  (101 MHz,  $\text{CDCl}_3$ )  $\delta$  168.42, 155.12, 145.87, 137.77, 132.08, 129.79, 129.60, 128.05, 79.50, 51.96 (d,  $J = 4.0$  Hz), 36.85, 36.33, 32.06, 29.04, 28.61, 21.34. **IR** ( $\text{CDCl}_3$ ): 2929.98, 1722.63, 1693.21, 1423.92, 1365.27, 1250.06, 1168.41, 1078.26, 967.69, 864.18, 830.38, 781.95  $\text{cm}^{-1}$ . **HRMS-ESI** (positive)  $M = \text{C}_{20}\text{H}_{29}\text{NO}_4$ : calculated  $(M+\text{Na})^+$   $m/z$  371.2027; found  $(M+H)^+$   $m/z$  371.2030.

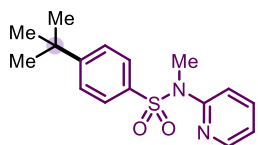

**4-(tert-butyl)-N-methyl-N-(pyridin-2-yl)benzenesulfonamide.**

Prepared according to General Procedure B from *N*-tert-butyl-1-(2,4,6-trimethoxyphenyl)methanimine (50.2 mg, 0.2 mmol) and 4-bromo-*N*-methyl-*N*-(pyridin-2-yl)benzenesulfonamide (32.7 mg, 0.1 mmol). Colorless oil (24.7 mg, 81%).  **$R_f$** : 0.6 in 30% EtOAc/hexanes.  **$^1\text{H NMR}$**  (500 MHz,  $\text{CDCl}_3$ )  $\delta$  8.32 – 8.27 (m, 1H), 7.75 – 7.66 (m, 2H), 7.50 (d,  $J = 8.8$  Hz, 2H), 7.42 (d,  $J = 8.8$  Hz, 2H), 7.11 (dd,  $J = 2.3, 1.2$  Hz, 1H), 3.28 (s, 3H), 1.30 (s, 9H).  **$^{13}\text{C NMR}$**  (126 MHz,  $\text{CDCl}_3$ )  $\delta$  156.83, 153.95, 147.98, 137.68, 134.43, 127.51, 126.05, 121.10, 120.85, 35.58, 35.27, 31.18. **IR** ( $\text{CDCl}_3$ ): 2962.94, 1588.87, 1467.43, 1434.86, 1351.87, 1268.50, 1179.80, 1159.53, 1112.37, 1085.14, 1068.29, 891.22, 873.98, 837.18, 785.97, 757.68, 711.66, 629.83, 585.56, 547.67  $\text{cm}^{-1}$ . **HRMS-ASAP** (positive)  $M = \text{C}_{16}\text{H}_{20}\text{N}_2\text{O}_2\text{S}$ : calculated  $(M+H)^+$   $m/z$  306.1354; found  $(M+H)^+$   $m/z$  306.1353.

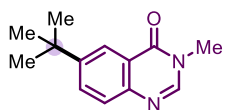

**6-(tert-butyl)-3-methylquinazolin-4(3H)-one.** Prepared according to General Procedure B from *N*-tert-butyl-1-(2,4,6-trimethoxyphenyl)methanimine (50.2 mg, 0.2 mmol) and 6-bromo-3-methylquinazolin-4(3H)-one (23.9 mg, 0.1 mmol). Colorless oil

(12.8 mg, 58%).  **$R_f$** : 0.1 in 30% EtOAc/hexanes.  **$^1\text{H NMR}$**  (400 MHz,  $\text{CDCl}_3$ )  $\delta$  8.30 (d,  $J = 2.3$  Hz, 1H), 8.01 (s, 1H), 7.81 (dd,  $J = 8.6, 2.3$  Hz, 1H), 7.65 (d,  $J = 8.6$  Hz, 1H), 3.59 (s, 3H), 1.39 (s, 9H).  **$^{13}\text{C NMR}$**  (101 MHz,  $\text{CDCl}_3$ )  $\delta$  162.01, 150.98, 146.35 (d,  $J = 5.5$  Hz), 132.34, 127.27, 122.43, 121.55, 35.22, 34.20, 31.43. **IR** ( $\text{CDCl}_3$ ): 2960.31, 1870.07, 1671.22, 1607.34, 1491.96, 1466.00, 1364.38, 1337.63, 1357.29, 1211.59, 1131.39, 1058.17, 839.47, 795.09, 779.86, 615.11, 546.48  $\text{cm}^{-1}$ . **HRMS-ASAP** (positive)  $M = \text{C}_{13}\text{H}_{16}\text{N}_2\text{O}$ : calculated  $(M+H)^+$   $m/z$  218.1372; found  $(M+H)^+$   $m/z$  218.1375.

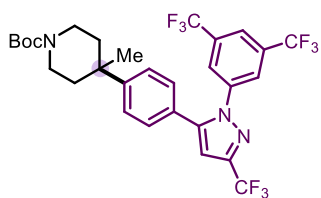

**tert-butyl 4-(4-(1-(3,5-bis(trifluoromethyl)phenyl)-3-(trifluoromethyl)-1H-pyrazol-5-yl)phenyl)-3-(trifluoromethyl)-1H-pyrazol-5-yl)phenyl)-4-methylpiperidine-1-carboxylate.** Prepared

according to General Procedure B from 1-(3,5-bis(trifluoromethyl)phenyl)-5-(4-bromophenyl)-3-(trifluoromethyl)-1H-pyrazole (50.3 mg, 0.1 mmol) and *tert*-butyl-4-methyl-4-((2,4,6-trimethoxybenzylidene)amino)piperidine-1-carboxylate (78.4 mg, 0.2 mmol). Clear oil (31.0 mg, 50%).  **$R_f$** : 0.2 in 10% EtOAc/hexanes.  **$^1\text{H NMR}$**  (500 MHz,  $\text{CDCl}_3$ )  $\delta$  7.81 (s, 1H), 7.74 (s, 2H), 7.38

(d,  $J = 8.4$  Hz, 2H), 7.20 (d,  $J = 8.4$  Hz, 2H), 6.80 (s, 1H), 3.55 – 3.46 (m, 2H), 3.37 – 3.29 (m, 2H), 2.03 (m, 2H), 1.70 (m, 2H), 1.46 (s, 9H), 1.25 (s, 3H).  $^{13}\text{C NMR}$  (126 MHz,  $\text{CDCl}_3$ )  $\delta$  155.11, 150.71, 145.23, 140.31, 132.67 (q,  $J = 34.3$  Hz), 129.32, 126.85, 126.01, 124.95, 123.73, 121.56, 106.78, 79.63, 36.88, 29.11, 28.58.  $^{19}\text{F NMR}$  (471 MHz,  $\text{CDCl}_3$ )  $\delta$  -61.65, -62.31. **IR** ( $\text{CDCl}_3$ ): 2934.19, 1690.68, 1470.17, 1396.48, 1279.88, 1235.53, 1168.61, 1139.33, 972.47, 897.19, 814.06, 706.75, 681.15  $\text{cm}^{-1}$ . **HRMS-ESI** (positive)  $M = \text{C}_{29}\text{H}_{28}\text{F}_9\text{N}_3\text{O}_2$ : calculated  $(M+\text{Na})^+$   $m/z$  644.1935; found  $(M+\text{H})^+$   $m/z$ , 644.1922.

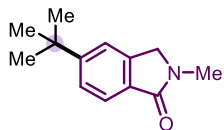

**5-(*tert*-butyl)-2-methylisoindolin-1-one.** Prepared according to General Procedure B from *N-tert*-butyl-1-(2,4,6-trimethoxyphenyl)methanimine (50.2 mg, 0.2 mmol) and 5-bromo-2-methylisoindolin-1-one (22.6 mg, 0.1 mmol). Light yellow oil (15.2 mg, 75%).  $^1\text{H NMR}$  (500 MHz,  $\text{CDCl}_3$ )  $\delta$  7.78 (d,  $J = 8.0$  Hz, 1H), 7.52 (dd,  $J = 8.0, 1.7$  Hz, 1H), 7.50 – 7.44 (d,  $J = 1.7$  Hz, 1H), 4.37 (s, 2H), 3.21 (s, 3H), 1.38 (s, 9H).  $^{13}\text{C NMR}$  (126 MHz,  $\text{CDCl}_3$ )  $\delta$  168.91, 155.15, 141.26, 130.48, 125.56, 123.28, 119.52, 52.25, 35.40, 31.56, 29.61. **IR** ( $\text{CDCl}_3$ ): 2961.76, 1681.83, 1602.47, 1460.55, 1424.49, 1399.04, 1364.77, 1275.87, 1212.46, 1159.69, 1126.22, 908.81, 840.68, 776.93, 730.97, 698.88. **LRMS** (EI) [ $\text{C}_{13}\text{H}_{17}\text{NO}$ ]:  $m/z$  calculated 203.13; found 203.1.

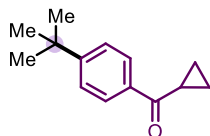

**(4-(*tert*-butyl)phenyl)(cyclopropyl)methanone.** Prepared according to General Procedure B from *N-tert*-butyl-1-(2,4,6-trimethoxyphenyl)methanimine (50.2 mg, 0.2 mmol) and (4-bromophenyl)(cyclopropyl)methanone (22.5 mg, 0.1 mmol). Clear oil (18.6 mg, 92%).  $^1\text{H NMR}$  (500 MHz,  $\text{CDCl}_3$ )  $\delta$  7.97 (d,  $J = 8.7$  Hz, 2H), 7.50 (d,  $J = 8.7$  Hz, 2H), 2.67 (m, 1H), 1.35 (s, 9H), 1.28 – 1.20 (m, 2H), 1.02 (m, 2H).  $^{13}\text{C NMR}$  (126 MHz,  $\text{CDCl}_3$ )  $\delta$  200.34, 156.54, 135.55, 128.13, 125.58, 35.21, 31.26, 17.10, 11.51.

Spectroscopic data matches with previously reported data.<sup>7</sup>

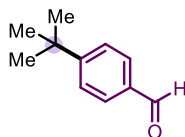

**4-(*tert*-butyl)benzaldehyde.** Prepared according to General Procedure B from *N-tert*-butyl-1-(2,4,6-trimethoxyphenyl)methanimine (50.2 mg, 0.2 mmol) and 4-bromobenzaldehyde (18.5 mg, 0.1 mmol). Colorless oil (9.6 mg, 59%).  $^1\text{H NMR}$  (500 MHz,  $\text{CDCl}_3$ )  $\delta$  9.98 (s, 1H), 7.82 (d,  $J = 8.9$  Hz, 2H), 7.55 (d,  $J = 8.2$  Hz, 2H), 1.36 (s, 9H).  $^{13}\text{C NMR}$  (126 MHz,  $\text{CDCl}_3$ )  $\delta$  192.21, 158.61, 134.24, 129.85, 126.15, 35.51, 31.23. Spectroscopic data matches with previously reported data.<sup>5</sup>

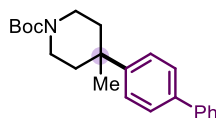

***tert*-butyl 4-([1,1'-biphenyl]-4-yl)-4-methylpiperidine-1-carboxylate.** Prepared according to General Procedure B from *tert*-butyl-4-methyl-4-((2,4,6-trimethoxybenzylidene)amino)piperidine-1-carboxylate (78.4 mg, 0.2 mmol), 4-iodo-1,1'-biphenyl (28.0 mg, 0.1 mmol), and LiCl (4.4 mg, 0.1 mmol). Clear oil (16.4 mg, 47%). **R<sub>f</sub>**: 0.3 in 10% EtOAc/hexanes.  $^1\text{H NMR}$  (500 MHz,  $\text{CDCl}_3$ )  $\delta$  7.64 – 7.56 (m, 4H), 7.49 – 7.40 (m, 4H), 7.39 – 7.32 (m, 1H), 3.54 (m, 2H), 3.48 – 3.42 (m, 2H), 2.13 (m, 2H), 1.73 (m, 2H), 1.48 (s, 9H), 1.32 (s, 3H).  $^{13}\text{C NMR}$  (126 MHz,  $\text{CDCl}_3$ )  $\delta$  155.02, 147.22, 140.78, 138.74, 128.75, 127.18, 127.15, 127.01, 126.18, 79.32, 36.73, 36.34, 29.10, 28.49. **IR** ( $\text{CDCl}_3$ ): 2929.70, 1690.73, 1484.97, 1422.61, 1365.06, 1248.77, 1169.65, 1124.38, 1099.73, 908.39, 865.91, 836.33, 766.42, 733.14, 698.06  $\text{cm}^{-1}$ . **HRMS-ESI** (positive)  $M = \text{C}_{23}\text{H}_{29}\text{NO}_2$ : calculated  $(M+\text{Na})^+$   $m/z$  375.2129; found  $(M+\text{H})^+$   $m/z$  375.2143.

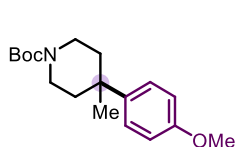

***tert*-butyl 4-(4-methoxyphenyl)-4-methylpiperidine-1-carboxylate.** Prepared according to General Procedure B from *tert*-butyl-4-methyl-4-((2,4,6-trimethoxybenzylidene)amino)piperidine-1-carboxylate (78.4 mg, 0.2 mmol), 1-iodo-4-methoxybenzene (23.4 mg, 0.1 mmol), and LiCl (4.4 mg, 0.1 mmol). Clear oil (11.6 mg, 38%). **R<sub>f</sub>**: 0.2 in 10% EtOAc/hexanes.  $^1\text{H NMR}$  (500 MHz,  $\text{CDCl}_3$ )  $\delta$  7.23 (m, 2H), 6.88 (m, 2H), 3.80 (s, 3H), 3.47 (m, 2H), 3.36 (m, 2H), 2.02 (m, 2H), 1.65 (m, 2H), 1.45 (s, 9H), 1.23 (s, 3H).  $^{13}\text{C NMR}$  (126 MHz,  $\text{CDCl}_3$ )  $\delta$  157.55, 155.02, 140.14, 126.73, 113.79, 79.26, 55.24, 36.91, 35.82, 29.27, 28.48. **IR** ( $\text{CDCl}_3$ ): 2933.36, 1689.88, 1609.62, 1513.69, 1423.45, 1365.42, 1278.33, 1249.10, 1170.08, 1124.01, 1036.70, 908.99, 829.05, 732.09. **HRMS-ESI** (positive)  $M = \text{C}_{18}\text{H}_{27}\text{NO}_3$ : calculated  $(M+\text{Na})^+$   $m/z$  328.1889; found  $(M+\text{Na})^+$   $m/z$  328.1902.

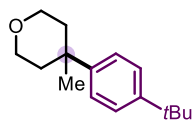

**4-(4-(*tert*-butyl)phenyl)-4-methyltetrahydro-2H-pyran.** Prepared according to General Procedure B from *N*-(4-methyltetrahydro-2H-pyran-4-yl)-1-(2,4,6-trimethoxyphenyl)methanimine (58.7 mg, 0.2 mmol) and 1-(*tert*-butyl)-4-iodobenzene (26.0 mg, 0.1 mmol) and LiCl (4.4 mg, 0.1 mmol). Clear oil (7.6 mg, 33%).  $R_f$ : 0.2 in 5% EtOAc/hexanes.  $^1\text{H NMR}$  (500 MHz,  $\text{CDCl}_3$ )  $\delta$  7.35 (d,  $J = 8.6$  Hz, 2H), 7.25 (d,  $J = 8.6$  Hz, 2H), 3.79 – 3.74 (m, 2H), 3.72 – 3.66 (m, 2H), 2.10 (m, 2H), 1.77 – 1.69 (m, 2H), 1.32 (s, 9H), 1.29 (s, 3H).  $^{13}\text{C NMR}$  (126 MHz,  $\text{CDCl}_3$ )  $\delta$  148.35, 145.79, 128.68, 125.12 (d,  $J = 9.1$  Hz), 64.40, 37.58, 35.08, 34.18, 32.90, 31.29 (d,  $J = 5.0$  Hz). **IR** ( $\text{CDCl}_3$ ): 2957.25, 2854.27, 1391.01, 1269.75, 1109.33, 1018.16, 828.14, 575.25  $\text{cm}^{-1}$ . **LRMS** (EI) [ $\text{C}_{16}\text{H}_{24}\text{O}$ ]  $m/z$  calculated 232.18; found 232.1.

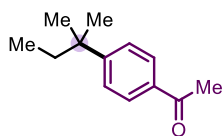

**1-(4-(*tert*-pentyl)phenyl)ethan-1-one.** Prepared according to General Procedure B from *N*-*tert*-pentyl-1-(2,4,6-trimethoxyphenyl)methanimine (53 mg, 0.2 mmol) and 1-(4-bromophenyl)ethan-1-one (19.9 mg, 0.1 mmol). Colorless oil (16.0 mg, 84%).  $^1\text{H NMR}$  (400 MHz,  $\text{CDCl}_3$ )  $\delta$  7.90 (d,  $J = 8.7$  Hz, 2H), 7.42 (d,  $J = 8.7$  Hz, 2H), 2.59 (s, 6H), 1.68 (q,  $J = 7.5$  Hz, 2H), 0.68 (t,  $J = 7.5$  Hz, 3H).  $^{13}\text{C NMR}$  (101 MHz,  $\text{CDCl}_3$ )  $\delta$  198.05, 155.51, 134.72, 128.46, 126.33, 38.56, 36.83, 28.41, 26.68, 9.19. **IR** ( $\text{CDCl}_3$ ) 2965.35, 2877.05, 1682.72, 1605.75, 1459.87, 1406.00, 1357.15, 1269.88, 1192.78, 1116.94, 1013.58, 957.10, 838.16, 628.60, 600.02, 556.88  $\text{cm}^{-1}$ . **LRMS** (EI) [ $\text{C}_{13}\text{H}_{18}\text{O}$ ]  $m/z$  calculated 190.14; found 190.1.

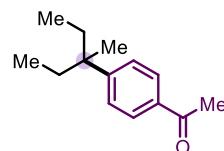

**1-(4-(3-methylpentan-3-yl)phenyl)ethan-1-one.** Prepared according to General Procedure B from *N*-(3-methylpentan-3-yl)-1-(2,4,6-trimethoxyphenyl)methanimine (55.8 mg, 0.2 mmol) and 1-(4-bromophenyl)ethan-1-one (19.9 mg, 0.1 mmol). Colorless oil (13.5 mg, 65%).  $^1\text{H NMR}$  (500 MHz,  $\text{CDCl}_3$ )  $\delta$  7.90 (d,  $J = 8.6$  Hz, 2H), 7.37 (d,  $J = 8.6$  Hz, 2H), 2.59 (s, 3H), 1.82 – 1.69 (m, 2H), 1.66 – 1.58 (m, 2H), 1.27 (s, 3H), 0.66 (t,  $J = 10$  Hz, 6H).  $^{13}\text{C NMR}$  (126 MHz,  $\text{CDCl}_3$ )  $\delta$  198.02, 153.81, 134.46, 128.10, 126.86, 55.34, 41.87, 35.18, 26.55, 22.60, 8.62. **IR** ( $\text{CDCl}_3$ ): 2966.18, 2929.31, 1682.66, 1605.37, 1460.12, 1407.94, 1357.71, 1269.77, 1153.13, 956.52, 908.02, 825.51, 732.16, 600.94  $\text{cm}^{-1}$ . **HRMS-ASAP** (positive)  $M = \text{C}_{14}\text{H}_{20}\text{O}$ : calculated (M+H) $^+$   $m/z$  206.1626; found (M+H) $^+$   $m/z$  206.1629.

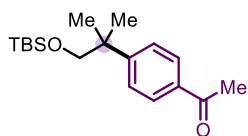

**1-(4-(1-((*tert*-butyldimethylsilyloxy)-2-methylpropan-2-yl)phenyl)ethan-1-one.** Prepared according to General Procedure B from *N*-(1-((*tert*-butyldimethylsilyloxy)-2-methylpropan-2-yl)-1-(2,4,6-trimethoxyphenyl)methanimine (76.2 mg, 0.2 mmol) and 1-(4-bromophenyl)ethan-1-one (19.9 mg, 0.1 mmol). Colorless oil (15.1 mg, 49%).  $^1\text{H NMR}$  (400 MHz,  $\text{CDCl}_3$ )  $\delta$  7.89 (d,  $J = 8.2$  Hz, 2H), 7.47 (d,  $J = 8.2$  Hz, 2H), 3.56 (s, 2H), 2.59 (s, 3H), 1.32 (s, 6H), 0.83 (s, 9H), -0.07 (s, 6H).  $^{13}\text{C NMR}$  (126 MHz,  $\text{CDCl}_3$ )  $\delta$  198.17, 153.78, 134.93, 128.12, 126.78, 72.61, 40.62, 26.73, 25.95, 25.36, 18.37, -5.49. **IR** ( $\text{CDCl}_3$ ): 2929.68, 2856.4, 1684.30, 1806.32, 1359.65, 1270.48, 1092.35, 905.65, 837.08, 776.48, 731.30, 649.61  $\text{cm}^{-1}$ . **HRMS-ASAP** (positive)  $M = \text{C}_{18}\text{H}_{30}\text{O}_2\text{Si}$ : calculated (M+H) $^+$   $m/z$  308.2119; found (M+H) $^+$   $m/z$  308.2123.

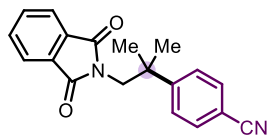

**4-(1-(1,3-dioxoisindolin-2-yl)-2-methylpropan-2-yl)benzotrile.** Prepared according to General Procedure B from 2-(2-methyl-2-((2,4,6-trimethoxybenzylidene)amino)propyl)isindoline-1,3-dione (79.2 mg, 0.2 mmol) and 4-bromobenzotrile (18.2 mg, 0.1 mmol). White solid (21.4 mg, 70%).  $R_f$ : 0.5 in 30% EtOAc/hexanes.  $^1\text{H NMR}$  (400 MHz,  $\text{CDCl}_3$ )  $\delta$  7.81 (dq,  $J = 5.0, 3.0$  Hz, 1H), 7.72 (tt,  $J = 5.1, 2.5$  Hz, 1H), 7.61 (dt,  $J = 5.0, 3.0$  Hz, 1H), 7.58 – 7.52 (m, 1H), 3.81 (s, 0H), 1.43 (s, 1H).  $^{13}\text{C NMR}$  (101 MHz,  $\text{CDCl}_3$ )  $\delta$  168.65, 152.15, 134.27, 132.15, 127.32, 123.54, 119.09, 110.55, 49.38, 40.99, 26.82. **IR** ( $\text{CDCl}_3$ ): 2973.15, 2228.18, 1775.54, 1714.61, 1607.60, 1504.69, 1468.17, 1426.34, 1400.77, 1384.98, 1346.28, 1203.14, 1069.64, 1014.89, 910.46, 840.12, 727.69, 649.21, 569.43, 531.49  $\text{cm}^{-1}$ . **HRMS-ASAP** (positive)  $M = \text{C}_{19}\text{H}_{16}\text{N}_2\text{O}_2$ : calculated (M+H) $^+$   $m/z$  306.1322; found (M+H) $^+$   $m/z$  306.1323.

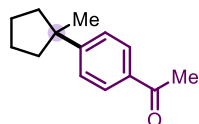

**1-(4-(1-methylcyclopentyl)phenyl)ethan-1-one.** Prepared according to General Procedure B from *N*-(1-methylcyclopentyl)-1-(2,4,6-trimethoxyphenyl)methanimine (55.4 mg, 0.2 mmol) and 1-(4-bromophenyl)ethan-1-one (19.9 mg, 0.1 mmol). Colorless oil (14.3 mg, 71%).  $^1\text{H NMR}$  (400 MHz,  $\text{CDCl}_3$ )  $\delta$  7.89 (d,  $J$  = 8.7 Hz, 2H), 7.41 (d,  $J$  = 8.8 Hz, 2H), 2.58 (s, 3H), 1.96 – 1.67 (m, 8H), 1.26 (s, 3H).  $^{13}\text{C NMR}$  (101 MHz,  $\text{CDCl}_3$ )  $\delta$  198.04, 157.37, 134.72, 128.45, 126.42, 47.65, 39.68, 29.39, 26.69, 23.82. **IR** ( $\text{CDCl}_3$ ): 2957.48, 2871.01, 1681.90, 1604.85, 1564.01, 1405.92, 1358.02, 1271.04, 1190.16, 1086.59, 1014.49, 956.88, 904.67, 835.21, 727.86, 649.72, 599.76  $\text{cm}^{-1}$ . **HRMS-ESI** (positive)  $M = \text{C}_{14}\text{H}_{18}\text{O}$ : calculated (M+H) $^+$   $m/z$  204.1470; found (M+H) $^+$   $m/z$ , 204.1478.

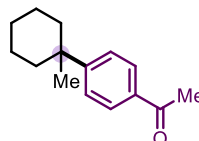

**1-(4-(1-methylcyclohexyl)phenyl)ethan-1-one.** Prepared according to General Procedure B from *N*-(1-methylcyclohexyl)-1-(2,4,6-trimethoxyphenyl)methanimine (58.2 mg, 0.2 mmol) and 1-(4-bromophenyl)ethan-1-one (19.9 mg, 0.1 mmol). Colorless oil (16.1 mg, 77%).  $R_f$ : 0.4 (10% EtOAc/hexanes).  $^1\text{H NMR}$  (500 MHz,  $\text{CDCl}_3$ )  $\delta$  7.92 (d,  $J$  = 8.8 Hz, 2H), 7.47 (d,  $J$  = 8.8 Hz, 2H), 2.59 (s, 3H), 2.03 (dd,  $J$  = 9.0, 4.9 Hz, 2H), 1.64 – 1.52 (m, 4H), 1.43 (d,  $J$  = 5.1 Hz, 4H), 1.19 (s, 3H).  $^{13}\text{C NMR}$  (126 MHz,  $\text{CDCl}_3$ )  $\delta$  198.04, 155.99, 134.62, 128.57, 126.32, 38.65, 37.87, 26.68, 26.39, 22.75.

Spectroscopic data matches with previously reported data.<sup>8</sup>

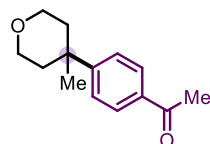

**1-(4-(4-methyltetrahydro-2H-pyran-4-yl)phenyl)ethan-1-one.** Prepared according to General Procedure B from *N*-(4-methyltetrahydro-2H-pyran-4-yl)-1-(2,4,6-trimethoxyphenyl)methanimine (58.6 mg, 0.2 mmol) and 1-(4-bromophenyl)ethan-1-one (19.9 mg, 0.1 mmol). Clear, colorless oil (12.9 mg, 59%).  $^1\text{H NMR}$  (500 MHz,  $\text{CDCl}_3$ )  $\delta$  7.94 (d,  $J$  = 8.6 Hz, 2H), 7.43 (d,  $J$  = 8.5 Hz, 2H), 3.77 (dd,  $J$  = 8.0, 3.3 Hz, 2H), 3.68 (dd,  $J$  = 6.8, 3.5 Hz, 2H), 2.60 (s, 4H), 2.12 (d,  $J$  = 3.7 Hz, 1H), 1.80 (d,  $J$  = 4.2 Hz, 0H), 1.31 (s, 4H).  $^{13}\text{C NMR}$  (126 MHz,  $\text{CDCl}_3$ )  $\delta$  197.88, 154.78, 135.11, 128.78, 126.00, 64.49, 37.57, 36.30, 28.98, 26.70.

Spectroscopic data matches with previously reported data.<sup>8</sup>

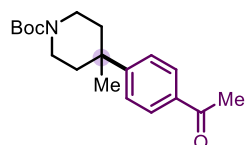

**tert-butyl 4-(4-acetylphenyl)-4-methylpiperidine-1-carboxylate.** Prepared according to General Procedure B from *tert*-butyl-4-methyl-4-((2,4,6-trimethoxybenzylidene)amino)piperidine-1-carboxylate (78.4 mg, 0.2 mmol) and 1-(4-bromophenyl)ethan-1-one (19.9 mg, 0.1 mmol). Clear, colorless oil (22.9 mg, 72%).  $^1\text{H NMR}$  (500 MHz,  $\text{CDCl}_3$ )  $\delta$  7.93 (d,  $J$  = 8.5 Hz, 2H), 7.43 (d,  $J$  = 8.5 Hz, 2H), 3.48 (dd,  $J$  = 7.9, 3.7 Hz, 2H), 3.42 – 3.34 (m, 2H), 2.59 (s, 3H), 2.07 (s, 2H), 1.71 (s, 2H), 1.45 (s, 9H), 1.27 (s, 3H).  $^{13}\text{C NMR}$  (126 MHz,  $\text{CDCl}_3$ )  $\delta$  197.88, 155.06, 154.04, 135.13, 128.79, 126.12, 79.60, 37.09, 28.81, 28.59, 26.71.

Spectroscopic data matches with previously reported data.<sup>8</sup>

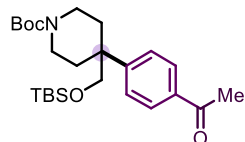

**tert-butyl 4-(4-acetylphenyl)-4-(((tert-butyl)dimethylsilyloxy)methyl)piperidine-1-carboxylate.** Prepared according to General Procedure B from *tert*-butyl-4-(((tert-butyl)dimethylsilyloxy)methyl)-4-((2,4,6-trimethoxybenzylidene)amino)piperidine-1-carboxylate (104.4 mg, 0.2 mmol) and 1-(4-bromophenyl)ethan-1-one (19.9 mg, 0.1 mmol). Clear, colorless oil (21.9 mg, 49%).  $^1\text{H NMR}$  (500 MHz,  $\text{CDCl}_3$ )  $\delta$  7.95 – 7.90 (m, 2H), 7.45 – 7.40 (m, 2H), 3.77 (m, 2H), 3.49 (s, 2H), 2.97 (m, 2H), 2.60 (s, 3H), 2.15 (m, 2H), 1.83 (m, 2H), 1.44 (s, 9H), 0.79 (s, 9H), -0.17 (s, 6H).  $^{13}\text{C NMR}$  (126 MHz,  $\text{CDCl}_3$ )  $\delta$  198.03, 155.16, 149.11, 135.29, 128.41, 127.77, 79.55, 71.89, 43.28, 31.50, 28.60, 26.73, 22.13, 18.32, -5.64. **IR** ( $\text{CDCl}_3$ ): 2952.88, 2929.44, 1695.71, 1605.76, 1419.53, 1363.54, 1269.73, 1248.73, 1168.99, 1099.14, 1011.52, 837.84, 775.95, 596.45  $\text{cm}^{-1}$ . **HRMS-ESI** (positive)  $M = \text{C}_{25}\text{H}_{41}\text{NO}_4\text{Si}$ : calculated (M+Na) $^+$   $m/z$  470.4703; found (M+H) $^+$   $m/z$ , 470.2722.

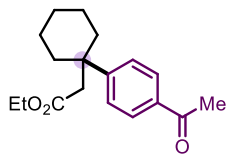

**ethyl 2-(1-(4-cyanophenyl)cyclohexyl)acetate.** Prepared according to General Procedure B from ethyl (2-(1-((2,4,6-trimethoxybenzylidene)amino)cyclohexyl)acetate (72.6 mg, 0.2 mmol) and 1-(4-bromophenyl)ethan-1-one (19.9 mg, 0.1 mmol). Light yellow solid (11.2 mg, 41%). **R<sub>f</sub>**: 0.2 in 10% EtOAc/hexanes. **<sup>1</sup>H NMR** (400 MHz, CDCl<sub>3</sub>) δ 7.92 (d, *J* = 8.8 Hz, 2H), 7.46 (d, *J* = 8.7 Hz, 2H), 3.86 (q, *J* = 7.1 Hz, 2H), 2.59 (s, 3H), 2.54 (s, 2H), 2.26 – 2.17 (m, 2H), 1.86 – 1.76 (m, 2H), 1.64 – 1.57 (m, 2H), 1.49 – 1.35 (m, 4H), 0.99 (t, *J* = 7.1 Hz, 3H). **<sup>13</sup>C NMR** (101 MHz, CDCl<sub>3</sub>) δ 198.01, 171.12, 135.02, 128.44, 127.18, 124.28, 60.06, 41.29, 36.25, 26.70, 26.22, 22.42, 14.15. **IR** (CDCl<sub>3</sub>): 2931.75, 1729.34, 1681.89, 1605.48, 1454.17, 1271.21, 1150.00, 1032.68, 903.47, 725.15, 649.72 cm<sup>-1</sup>. **HRMS-ASAP** (positive) *M* = C<sub>18</sub>H<sub>24</sub>O<sub>3</sub>: calculated (*M*+*H*)<sup>+</sup> *m/z* 290.1838; found (*M*+*H*)<sup>+</sup> *m/z* 290.1831.

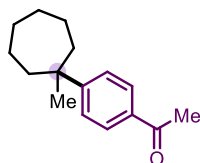

**1-(4-(1-methylcycloheptyl)phenyl)ethan-1-one.** Prepared according to General Procedure B from *N*-(1-methylcycloheptyl)-1-(2,4,6-trimethoxyphenyl)methanimine (71 mg, 0.2 mmol) and 1-(4-bromophenyl)ethan-1-one (19.9 mg, 0.1 mmol). Colorless oil (10.8 mg, 47%). **<sup>1</sup>H NMR** (500 MHz, CDCl<sub>3</sub>) δ 7.90 (d, *J* = 8.6 Hz, 2H), 7.45 (d, *J* = 8.6 Hz, 2H), 2.59 (s, 3H), 2.08 (d, *J* = 8.6 Hz, 1H), 1.71 (s, 1H), 1.51 (s, 10H), 1.23 (s, 3H). **<sup>13</sup>C NMR** (126 MHz, CDCl<sub>3</sub>) δ 198.05, 157.20, 134.55, 128.45, 126.38, 41.92, 40.80, 32.38, 30.02, 26.69, 23.82. **R<sub>f</sub>**: 0.5 in 5% EtOAc/hexanes. Spectroscopic data matches with previously reported data.<sup>8</sup>

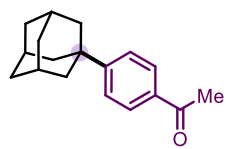

**1-(4-((3*r*,5*r*,7*r*)-adamantan-1-yl)phenyl)ethan-1-one.** Prepared according to General Procedure B from *N*-((3*r*,5*r*,7*r*)-adamantan-1-yl)-1-(2,4,6-trimethoxyphenyl)methanimine (69 mg, 0.2 mmol), 1-(4-bromophenyl)ethan-1-one (19.9 mg, 0.1 mmol), and NiCl<sub>2</sub>dtbbpy(H<sub>2</sub>O)<sub>4</sub> (4.7 mg, 0.01 mmol). White solid (17.6 mg, 69%). **<sup>1</sup>H NMR** (500 MHz, CDCl<sub>3</sub>) δ 7.92 (d, *J* = 8.5 Hz, 2H), 7.45 (d, *J* = 8.6 Hz, 2H), 2.59 (s, 4H), 2.12 (s, 3H), 1.93 (s, 6H), 1.85 – 1.72 (m, 6H). **<sup>13</sup>C NMR** (126 MHz, CDCl<sub>3</sub>) δ 198.10, 157.08, 134.79, 128.47, 125.27, 43.02, 36.84, 36.80, 28.94, 26.71.

Spectroscopic data matches with previously reported data.<sup>5</sup>

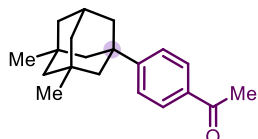

**1-(4-((1*r*,3*R*,5*S*,7*r*)-3,5-dimethyladamantan-1-yl)phenyl)ethan-1-one.** Prepared according to General Procedure B from *N*-((1*r*,3*R*,5*S*,7*r*)-3,5-dimethyladamantan-1-yl)-1-(2,4,6-trimethoxyphenyl)methanimine (71.4 mg, 0.2 mmol) and 1-(4-bromophenyl)ethan-1-one (19.9 mg, 0.1 mmol). Colorless oil (12.7 mg, 45%). **<sup>1</sup>H NMR** (500 MHz, CDCl<sub>3</sub>) δ 7.93 – 7.87 (m, 2H), 7.48 – 7.42 (m, 2H), 2.58 (s, 3H), 2.20 (hept, *J* = 3.3 Hz, 1H), 1.77 – 1.73 (m, 2H), 1.60 – 1.50 (m, 4H), 1.42 (q, *J* = 3.3 Hz, 4H), 1.28 – 1.16 (m, 2H), 0.89 (s, 6H). **<sup>13</sup>C NMR** (126 MHz, CDCl<sub>3</sub>) δ 197.98, 156.36, 134.70, 128.32, 125.26, 50.76, 49.24, 42.87, 41.47, 38.58, 31.52, 30.69, 29.89, 26.58. **IR** (CDCl<sub>3</sub>): 2899.59, 2841.60, 1682.31, 1604.53, 1453.74, 1405.69, 1356.68, 1270.23, 1014.26, 903.86, 727.35, 649.62, 597.69. **HRMS-ASAP** (positive) *M* = C<sub>20</sub>H<sub>26</sub>O: calculated (*M*+*H*)<sup>+</sup> *m/z* 284.2096; found (*M*+*H*)<sup>+</sup> *m/z* 284.2097.

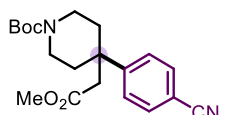

**tert-butyl 4-(4-cyanophenyl)-4-(2-methoxy-2-oxoethyl)piperidine-1-carboxylate.** Prepared according to General Procedure B from *tert*-butyl 4-(2-methoxy-2-oxoethyl)-4-((2,4,6-trimethoxybenzylidene)amino)piperidine-1-carboxylate (90.1 mg, 0.2 mmol) and 4-bromobenzonitrile (18.2 mg, 0.1 mmol). Clear oil (20.2 mg, 56%). **R<sub>f</sub>**: 0.2 in 30% EtOAc/hexanes. **<sup>1</sup>H NMR** (500 MHz, CDCl<sub>3</sub>) δ 7.64 (d, *J* = 8.7 Hz, 2H), 7.43 (d, *J* = 8.7 Hz, 2H), 3.62 (m, 2H), 3.43 (s, 3H), 3.26 – 3.17 (m, 2H), 2.62 (s, 2H), 2.22 (m, 2H), 1.94 (m, 2H), 1.44 (s, 9H). **<sup>13</sup>C NMR** (126 MHz, CDCl<sub>3</sub>) δ 170.76, 154.92, 149.51, 132.44, 127.66, 118.82, 110.70, 79.92, 55.95, 51.54, 46.09, 39.77, 35.05, 28.55. **IR** (CDCl<sub>3</sub>): 2973.94, 2227.72, 1734.98, 1688.54, 1606.89, 1423.76, 1247.00, 1162.70,

838.73  $\text{cm}^{-1}$ . **HRMS-ESI** (positive)  $M = \text{C}_{20}\text{H}_{26}\text{N}_2\text{O}_4$ : calculated  $(M+\text{Na})^+ m/z$  381.1790; found  $(M+\text{Na})^+ m/z$  381.1800.

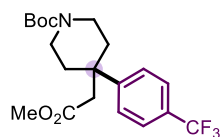

**tert-butyl 4-(2-methoxy-2-oxoethyl)-4-(4-(trifluoromethyl)phenyl)piperidine-1-carboxylate.** Prepared according to General Procedure B from *tert*-butyl 4-(2-methoxy-2-oxoethyl)-4-((2,4,6-trimethoxybenzylidene)amino)piperidine-1-carboxylate (90.1 mg, 0.2 mmol) and 1-bromo-4-(trifluoromethyl)benzene (22.5 mg, 0.1 mmol). Clear oil (26.0 mg, 65%).  **$^1\text{H NMR}$**  (400 MHz,  $\text{CDCl}_3$ )  $\delta$  7.60 (d,  $J = 8.1$  Hz, 2H), 7.44 (d,  $J = 8.1$  Hz, 2H), 3.70 – 3.60 (m, 2H), 3.42 (s, 3H), 3.20 (ddt,  $J = 13.8, 9.4, 4.8$  Hz, 2H), 2.61 (s, 2H), 2.33 – 2.21 (m, 2H), 1.94 (ddd,  $J = 13.8, 9.4, 3.7$  Hz, 2H), 1.44 (s, 9H).  **$^{13}\text{C NMR}$**  (101 MHz,  $\text{CDCl}_3$ )  $\delta$  170.94, 154.99, 147.84, 129.14, 128.82, 127.19, 125.60 (q,  $J = 3.7$  Hz), 122.90, 79.78, 51.45, 46.63, 39.59, 35.17, 28.57.  **$^{19}\text{F NMR}$**  (376 MHz,  $\text{CDCl}_3$ )  $\delta$  -62.53. **IR** ( $\text{CDCl}_3$ ): 2952, 1742, 1690, 1422, 1328.9, 1265.6, 1168.8, 1120.4, 1016.1, 800.2  $\text{cm}^{-1}$ . **LRMS** (EI) [ $\text{C}_{20}\text{H}_{26}\text{F}_3\text{NO}_4$ ]:  $m/z$  calculated 401.18, found 344.1 (loss of Boc *t*Bu).

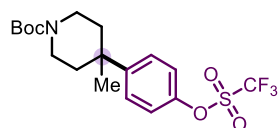

**tert-butyl 4-methyl-4-(4-(((trifluoromethyl)sulfonyl)oxy)phenyl)piperidine-1-carboxylate.** Prepared according to General Procedure B from *tert*-butyl-4-methyl-4-((2,4,6-trimethoxybenzylidene)amino)piperidine-1-carboxylate (78.4 mg, 0.2 mmol) and 4-iodophenyl trifluoromethanesulfonate (35.2 mg, 0.1 mmol). Clear oil (28.9 mg, 68%). **R<sub>f</sub>**: 0.5 in 30% EtOAc/hexanes.  **$^1\text{H NMR}$**  (400 MHz,  $\text{CDCl}_3$ )  $\delta$  7.40 (d,  $J = 9.0$  Hz, 2H), 7.23 (d,  $J = 8.9$  Hz, 2H), 3.44 (dd,  $J = 7.2, 4.5$  Hz, 4H), 2.00 (dt,  $J = 12.7, 6.0$  Hz, 2H), 1.70 (dt,  $J = 13.2, 5.3$  Hz, 2H), 1.45 (s, 9H), 1.27 (s, 3H).  **$^{13}\text{C NMR}$**  (101 MHz,  $\text{CDCl}_3$ )  $\delta$  155.03, 149.24, 147.77, 127.73, 121.36, 117.66 (d,  $J = 69.7$  Hz), 79.67, 40.45, 36.89, 36.63, 28.60, 28.46.  **$^{19}\text{F NMR}$**  (376 MHz,  $\text{CDCl}_3$ )  $\delta$  -72.89. **IR** ( $\text{CDCl}_3$ ): 2973.61, 2932.69, 1691.18, 1503.58, 1422.90, 1249.80, 1211.81, 1141.50, 890.51, 839.54  $\text{cm}^{-1}$ . **HRMS-ESI** (positive)  $M = \text{C}_{18}\text{H}_{24}\text{F}_3\text{NO}_5\text{S}$ : calculated  $(M+\text{Na})^+ m/z$  446.1225; found  $(M+\text{H})^+ m/z$  446.1237.

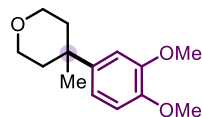

**4-(3,4-dimethoxyphenyl)-4-methyltetrahydro-2H-pyran.** Prepared according to General Procedure B from *N*-(4-methyltetrahydro-2H-pyran-4-yl)-1-(2,4,6-trimethoxyphenyl)methanimine (58.7 mg, 0.2 mmol) and 4-iodo-1,2-dimethoxybenzene (26.4 mg, 0.1 mmol) and LiCl (4.4 mg, 0.1 mmol). Off-white solid (6.8 mg, 29%).  **$^1\text{H NMR}$**  (500 MHz,  $\text{CDCl}_3$ )  $\delta$  6.85 (m, 3H), 3.89 (s, 3H), 3.88 (s, 3H), 3.75 (m, 2H), 3.71 (m, 2H), 2.08 (m, 2H), 1.78 – 1.69 (m, 2H), 1.29 (s, 3H).  **$^{13}\text{C NMR}$**  (126 MHz,  $\text{CDCl}_3$ )  $\delta$  148.95, 147.25, 141.88, 117.77, 111.16, 109.53, 68.21, 64.62, 56.10, 56.00, 38.02, 35.48, 33.14, 29.85. **IR** ( $\text{CDCl}_3$ ): 2922.93, 2849.83, 1589.78, 1462.53, 1260.02, 1244.75, 1147.80, 1029.12, 849.86, 806.15, 766.17  $\text{cm}^{-1}$ . **LRMS** (EI) [ $\text{C}_{14}\text{H}_{20}\text{O}_3$ ]  $m/z$  calculated 236.14; found 236.1.

## 5. Electrochemical Data –

Samples were prepared with 0.2 mmol of Ni(TMHD)<sub>2</sub> in 2 mL of 0.1 M tetra-*N*-butylammonium hexafluorophosphate in dry, degassed acetonitrile. 100 μL of DMSO was used to solubilize the nickel catalyst. Measurements were taken using a glassy carbon working electrode, silver pseudo reference electrode and platinum counter electrode. Ferrocene was added as a reference after each experiment, and the graphs were normalized accordingly. The scan rate was set at 100 mV/s. TBAC solutions in MeCN were added to achieve 5%, 10%, 20% loading relative to the nickel catalyst. The last scan is TBAC alone.

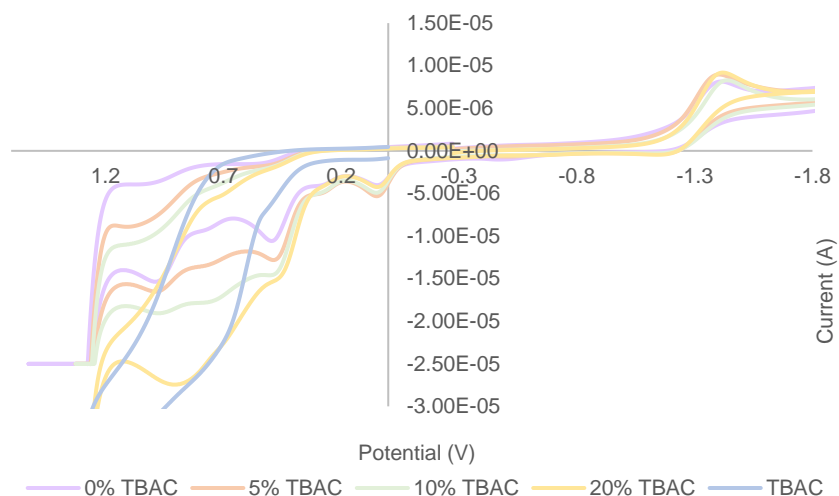

## 6. Kinetics Data

All LED-NMR experiments were run on a Bruker 500 MHz instrument equipped with the IDX probe using LED ( $\lambda = 420 \text{ nm}$ ).<sup>9,10</sup> The reaction was set up according to General Procedure B. *N*-*tert*-butyl-1-(2,4,6-trimethoxyphenyl)methanimine (0.1 mmol, 25.1 mg) was weighed outside the glove box and placed in a 1 dr vial equipped with stir bar. The vial was brought into an N<sub>2</sub>-filled glovebox. To this flask was added Ni(TMHD)<sub>2</sub> (4.25 mg, 0.01 mmol) and 0.1 mL of a stock solution of catalyst, [Ir(dF-CF<sub>3</sub>-ppy)<sub>2</sub>(dtbbpy)]PF<sub>6</sub> (0.0005 mmol, 0.5 mg), 1-(4-bromophenyl)ethan-1-one (19.9 mg, 0.1 mmol) and *n*Bu<sub>4</sub>NCl, followed by diluting the mixture up to a final volume of 2.0 mL DMSO-*d*<sub>6</sub>. A 400 μl aliquot from this solution was transferred into a 5 mm thin wall NMR tube followed by the placement of the coaxial insert. The cap was then placed over the NMR tube and was sealed using Parafilm®. The sample was then wrapped in aluminum foil and brought out of the glovebox. Prior to the sample being placed inside the LED NMR setup the aluminum foil was removed. Mesitylene was used as the internal standard. For one-hour initial rate reactions, the reactions were run in duplicate and shown is the average yield of two experiments.

### LED-NMR model reaction:

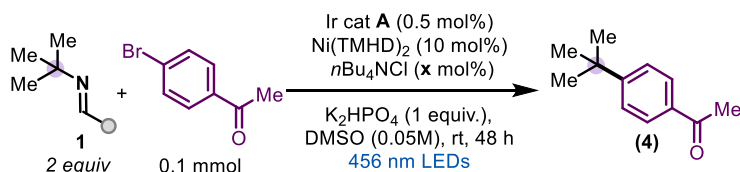



### Model NMR Spectrum:

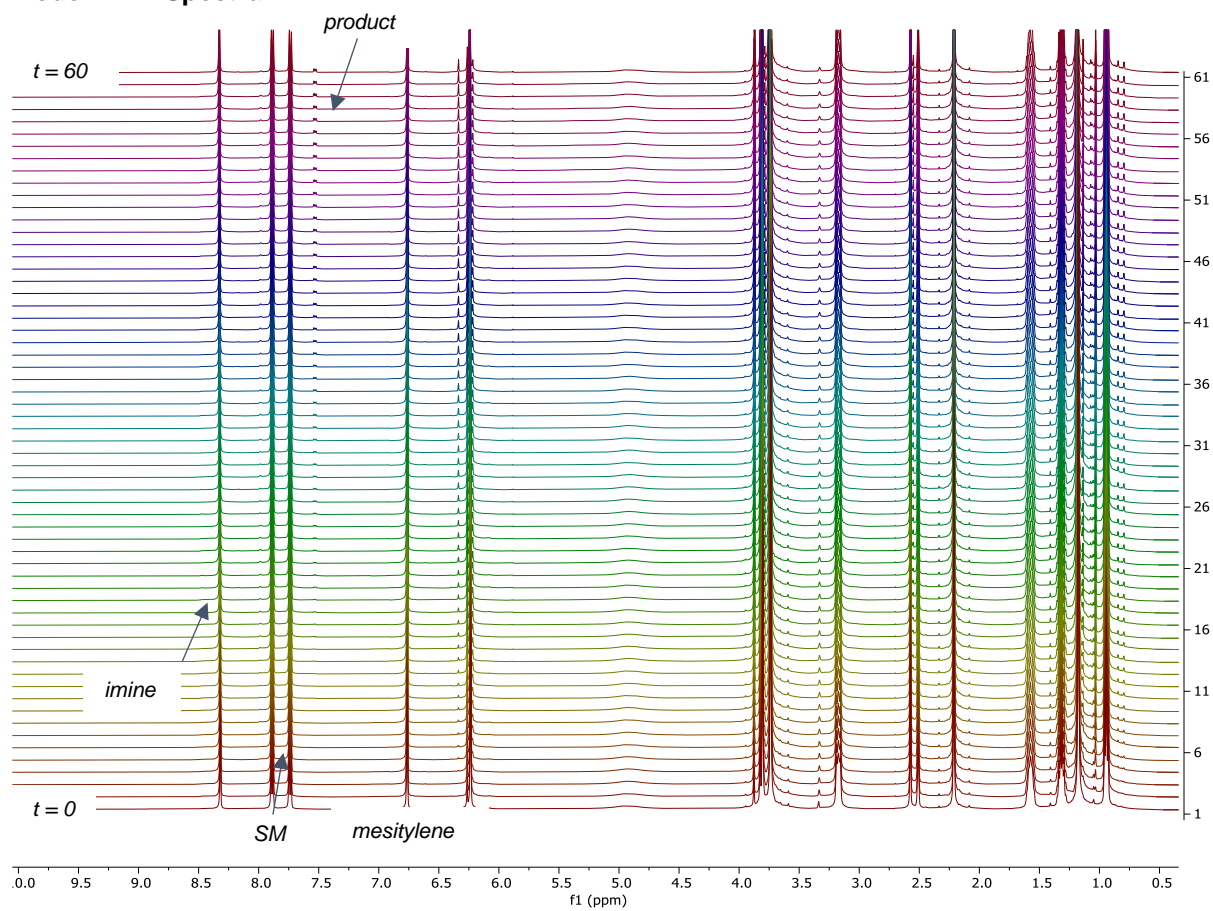



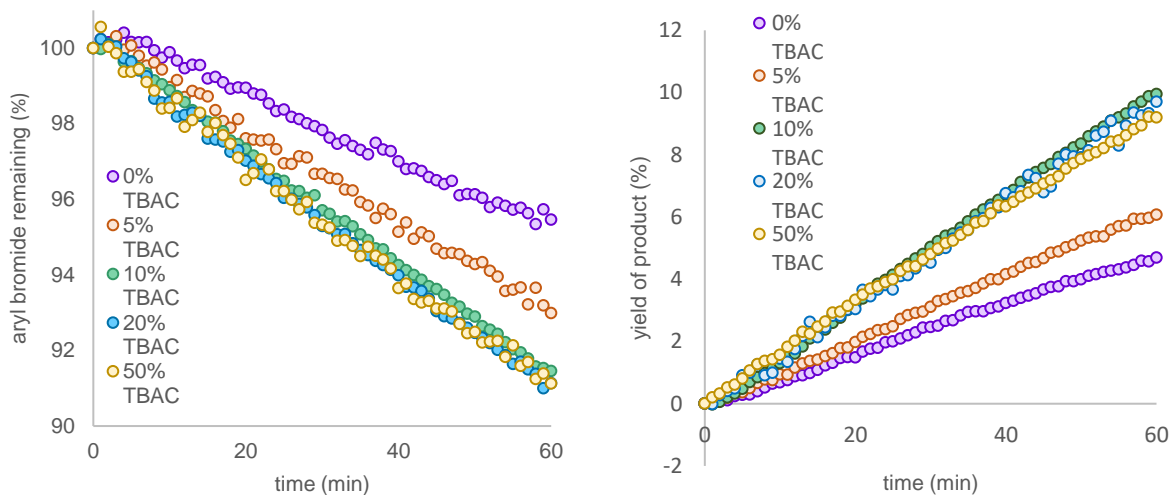

The slopes of the starting material consumption are shown below.

| additive loading(%) | slope (-) | accel.   |
|---------------------|-----------|----------|
| 0                   | 0.0878    | 1        |
| 5                   | 0.1231    | 1.40205  |
| 10                  | 0.1492    | 1.699317 |
| 20                  | 0.1544    | 1.758542 |
| 50                  | 0.153     | 1.742597 |

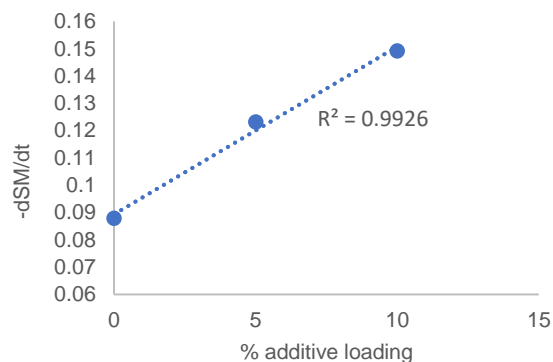

### Using other anions –

Kinetic experiments were taken of other additives in the form of TBAX, where X = PF<sub>6</sub>, BF<sub>4</sub>, ClO<sub>4</sub>, and OTf and set up according to the procedure mentioned above.

| time | Starting material remaining |                    |                     |          |
|------|-----------------------------|--------------------|---------------------|----------|
|      | TBAPF <sub>6</sub>          | TBABF <sub>4</sub> | TBAClO <sub>4</sub> | TBAOTf   |
| 0    | 100                         | 100                | 100                 | 100      |
| 1    | 100.2929                    | 100.8079           | 100.0538            | 100.2285 |
| 2    | 100.2096                    | 100.7288           | 100.1487            | 100.1799 |
| 3    | 100.0142                    | 100.0992           | 99.98321            | 100.1645 |
| 4    | 100.0237                    | 100.3339           | 100.0544            | 100.1104 |
| 5    | 99.95692                    | 100.169            | 99.87384            | 99.91405 |
| 6    | 99.81006                    | 99.95678           | 99.83858            | 99.86863 |
| 7    | 99.85246                    | 100.2636           | 99.65901            | 99.74153 |
| 8    | 99.59248                    | 100.1203           | 99.48249            | 99.6324  |
| 9    | 99.43391                    | 99.71328           | 99.24256            | 99.54077 |
| 10   | 99.38185                    | 99.93415           | 99.35125            | 99.38338 |
| 11   | 99.48852                    | 99.88838           | 99.23408            | 99.24382 |
| 12   | 99.28196                    | 99.42027           | 99.11793            | 99.22505 |
| 13   | 99.33792                    | 99.41618           | 98.86816            | 99.15613 |
| 14   | 99.20937                    | 99.22679           | 98.74625            | 98.98723 |
| 15   | 99.16308                    | 99.68708           | 98.51683            | 98.82654 |
| 16   | 99.14239                    | 99.40665           | 98.52344            | 98.70305 |
| 17   | 99.00536                    | 99.41465           | 98.34625            | 98.72892 |

|    |          |          |          |          |
|----|----------|----------|----------|----------|
| 18 | 98.76132 | 98.91761 | 98.24281 | 98.5064  |
| 19 | 98.97178 | 99.03417 | 98.20924 | 98.36021 |
| 20 | 98.79676 | 98.90672 | 98.12463 | 98.28215 |
| 21 | 98.85561 | 98.78472 | 97.99457 | 98.19636 |
| 22 | 98.66296 | 98.98823 | 97.78652 | 97.97746 |
| 23 | 98.43435 | 98.97819 | 97.72463 | 97.96422 |
| 24 | 98.61157 | 98.67531 | 97.63188 | 97.82102 |
| 25 | 98.30258 | 98.76855 | 97.41738 | 97.75999 |
| 26 | 98.23848 | 98.45104 | 97.48877 | 97.65212 |
| 27 | 98.0114  | 98.2722  | 97.35379 | 97.534   |
| 28 | 98.22338 | 98.07805 | 97.1554  | 97.45783 |
| 29 | 98.04871 | 98.18746 | 97.18745 | 97.3722  |
| 30 | 97.98375 | 98.14032 | 97.11437 | 97.21245 |
| 31 | 98.00631 | 97.88372 | 96.84561 | 97.15568 |
| 32 | 97.87606 | 97.79065 | 96.81357 | 96.98662 |
| 33 | 97.56402 | 97.70778 | 96.7822  | 96.87213 |
| 34 | 97.63881 | 97.3758  | 96.59771 | 96.83097 |
| 35 | 97.3695  | 97.30977 | 96.47427 | 96.79391 |
| 36 | 97.30302 | 97.09605 | 96.51106 | 96.67689 |
| 37 | 97.37544 | 97.49848 | 96.47647 | 96.60624 |
| 38 | 96.98199 | 97.21448 | 96.24604 | 96.41321 |
| 39 | 97.28589 | 96.99787 | 96.20382 | 96.35912 |
| 40 | 97.41817 | 96.84524 | 96.14667 | 96.22854 |
| 41 | 97.15599 | 97.08159 | 95.92488 | 96.12824 |
| 42 | 97.19584 | 96.83571 | 95.86299 | 96.08346 |
| 43 | 96.91449 | 97.01557 | 95.89351 | 95.95304 |
| 44 | 96.91229 | 96.80712 | 95.79279 | 95.84738 |
| 45 | 96.43116 | 96.71507 | 95.83586 | 95.88207 |
| 46 | 96.67215 | 96.69703 | 95.6702  | 95.8346  |
| 47 | 96.85107 | 96.43396 | 95.47554 | 95.59079 |
| 48 | 96.57023 | 96.56175 | 95.50047 | 95.61603 |
| 49 | 96.58702 | 96.05655 | 95.24985 | 95.56982 |
| 50 | 96.43913 | 96.26261 | 95.27359 | 95.48308 |
| 51 | 96.50002 | 96.14282 | 95.18084 | 95.30504 |
| 52 | 96.24919 | 96.04532 | 95.12387 | 95.22272 |
| 53 | 96.25242 | 95.99206 | 95.26223 | 95.17115 |
| 54 | 96.05094 | 96.11474 | 94.99517 | 95.08394 |
| 55 | 96.09928 | 96.09143 | 94.95651 | 94.97938 |
| 56 | 96.16898 | 95.59456 | 94.8468  | 95.09718 |
| 57 | 96.01109 | 95.8692  | 94.9621  | 94.78966 |
| 58 | 95.93596 | 95.87107 | 94.73879 | 94.98663 |
| 59 | 95.84337 | 95.82751 | 94.59907 | 94.71018 |
| 60 | 95.70261 | 95.57125 | 94.62348 | 94.6195  |

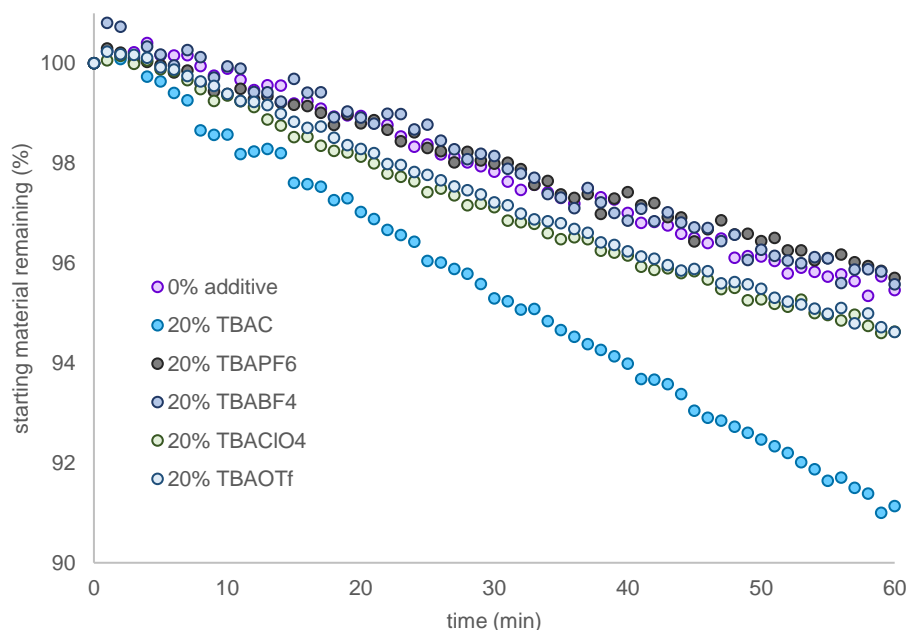

Although none of these additives show as significant of a rate enhancement as TBACl, TBAClO<sub>4</sub> and TBAOTf do show a slight rate enhancement. Below are the slopes and the relative rate increase compared to no additive loading.

| anion | slope (-) | accel.   |
|-------|-----------|----------|
| 0%    | 0.0878    | 1        |
| PF6   | 0.0762    | 0.867882 |
| BF4   | 0.0867    | 0.987472 |
| ClO4  | 0.0968    | 1.102506 |
| OTf   | 0.0976    | 1.111617 |
| Cl-   | 0.1544    | 1.758542 |

To obtain data for the full 48-hour experiment, the same model reaction was set up according to General Procedure B in DMSO-*d*<sub>6</sub> with mesitylene (0.1 mmol) as an internal standard. 20 μL aliquots were taken at the specified times and further diluted, then analyzed by <sup>1</sup>HNMR.

| time (hours) | product/IS |            | yield of product(%) |             | SM/IS    |          | SM remaining |          |
|--------------|------------|------------|---------------------|-------------|----------|----------|--------------|----------|
|              | 0% TBAC    | 20% TBAC   | 0% TBAC             | 20% TBAC    | 0% TBAC  | 20% TBAC | 0% TBAC      | 20% TBAC |
| 0            | 0          | 0          | 0                   | 0           | 0.1      | 0.1      | 100          | 100      |
| 1            | 0.009536   | 0.02423775 | 9.53571429          | 24.23775216 | 0.082944 | 0.077875 | 82.94379     | 77.875   |
| 2            | 0.014763   | 0.0368572  | 14.7630332          | 36.8572028  | 0.070795 | 0.063428 | 70.79545     | 63.4276  |
| 3            | 0.01861    | 0.04186166 | 18.6102418          | 41.86166008 | 0.063142 | 0.055597 | 63.14189     | 55.59684 |
| 4            | 0.020288   | 0.04811182 | 20.2876526          | 48.11181507 | 0.058958 | 0.050605 | 58.95773     | 50.60469 |
| 5            | 0.022488   | 0.05309659 | 22.4879679          | 53.09659091 | 0.054756 | 0.043327 | 54.75586     | 43.32682 |
| 6            | 0.022812   | 0.0549984  | 22.8124535          | 54.99839798 | 0.052035 | 0.037681 | 52.03466     | 37.68145 |
| 8            | 0.027429   | 0.06326657 | 27.4293056          | 63.26657264 | 0.042221 | 0.022704 | 42.22139     | 22.7044  |

|    |          |            |            |             |          |          |          |          |
|----|----------|------------|------------|-------------|----------|----------|----------|----------|
| 10 | 0.027528 | 0.0648414  | 27.527907  | 64.84140297 | 0.038195 | 0.018087 | 38.19482 | 18.0871  |
| 12 | 0.031997 | 0.06791217 | 31.9968406 | 67.91216518 | 0.037681 | 0.014511 | 37.68145 | 14.51087 |
| 27 | 0.035332 | 0.08295873 | 35.3321759 | 82.95873181 | 0.035044 | 0.011635 | 35.04375 | 11.63453 |
| 34 | 0.039766 | 0.08357317 | 39.7659574 | 83.57317073 | 0.036567 | 0.011681 | 36.56739 | 11.68125 |
| 48 | 0.049444 | 0.0873577  | 49.4444444 | 87.35769598 |          |          |          |          |

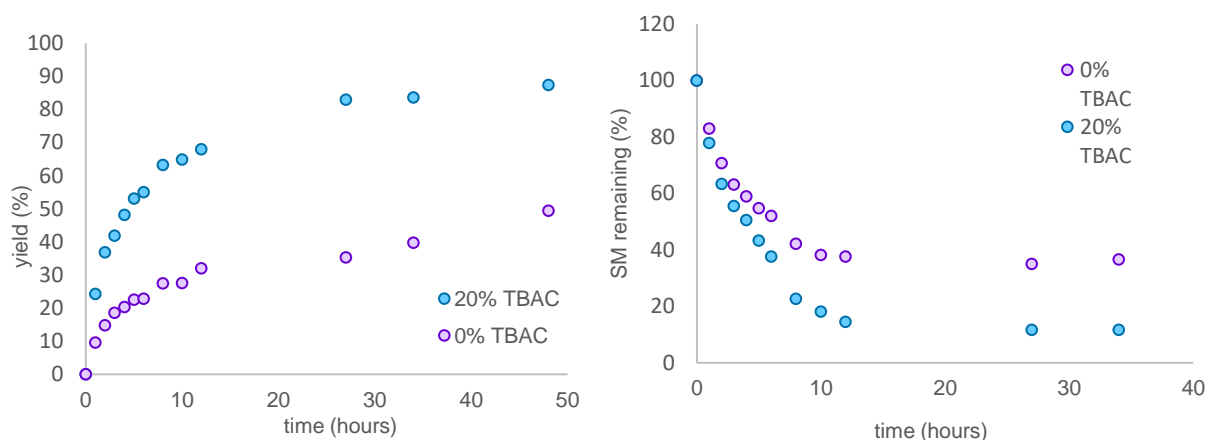

## 7. UV-Vis Data

Samples were taken using 0.02 mmol of  $\text{Ni}(\text{TMHD})_2$  and 0, 0.01, and 0.02 mmol of  $n\text{Bu}_4\text{NCl}$  in 2 mL of DMSO. The window of excitation was 350-1100 nm.

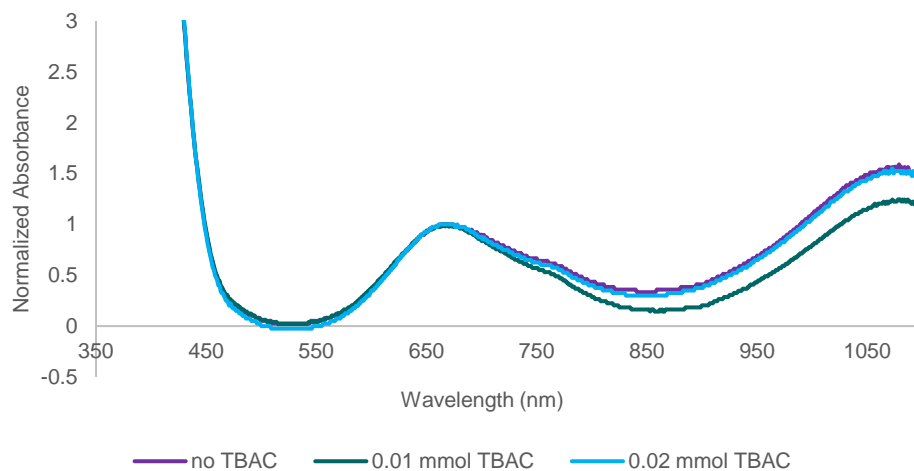

## 8. Spectra

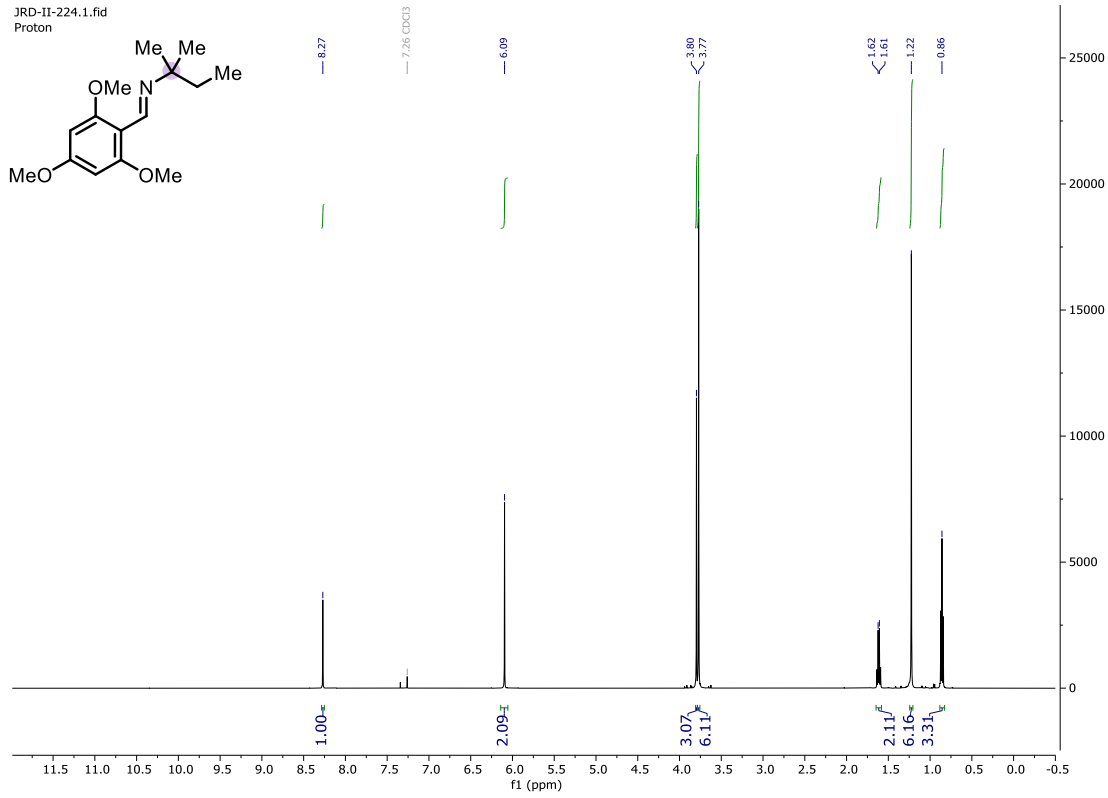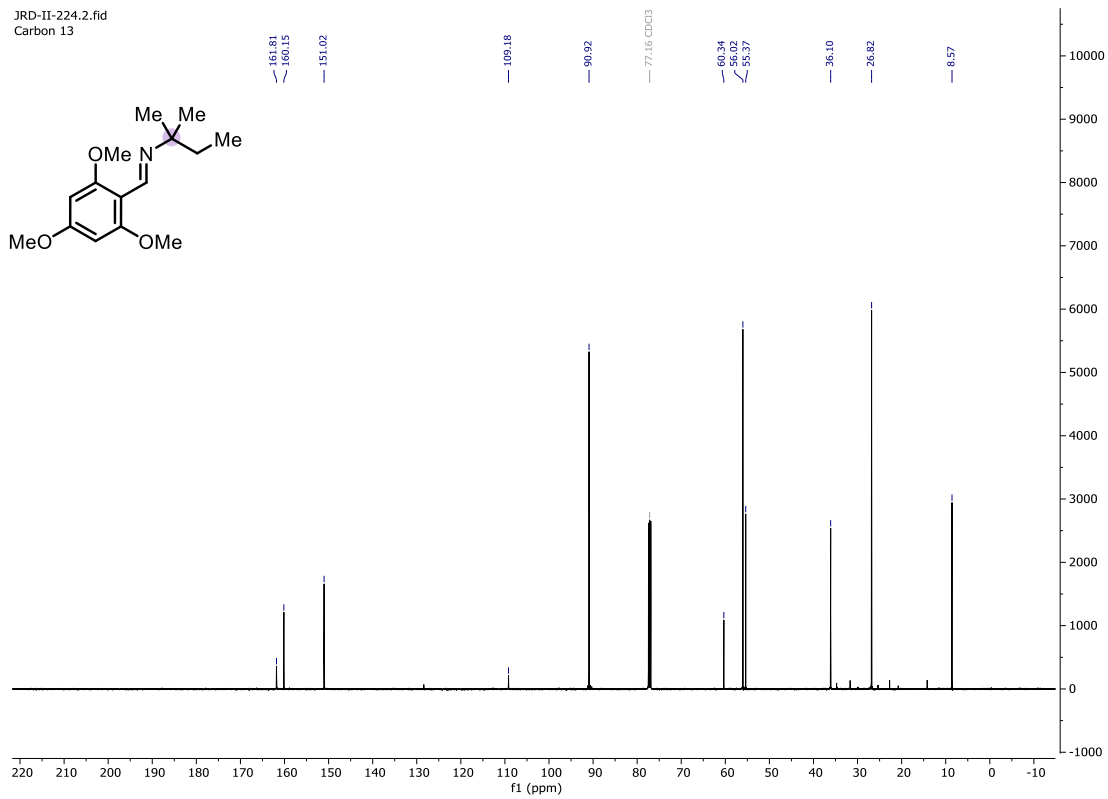

JRD-II-40.3.fid

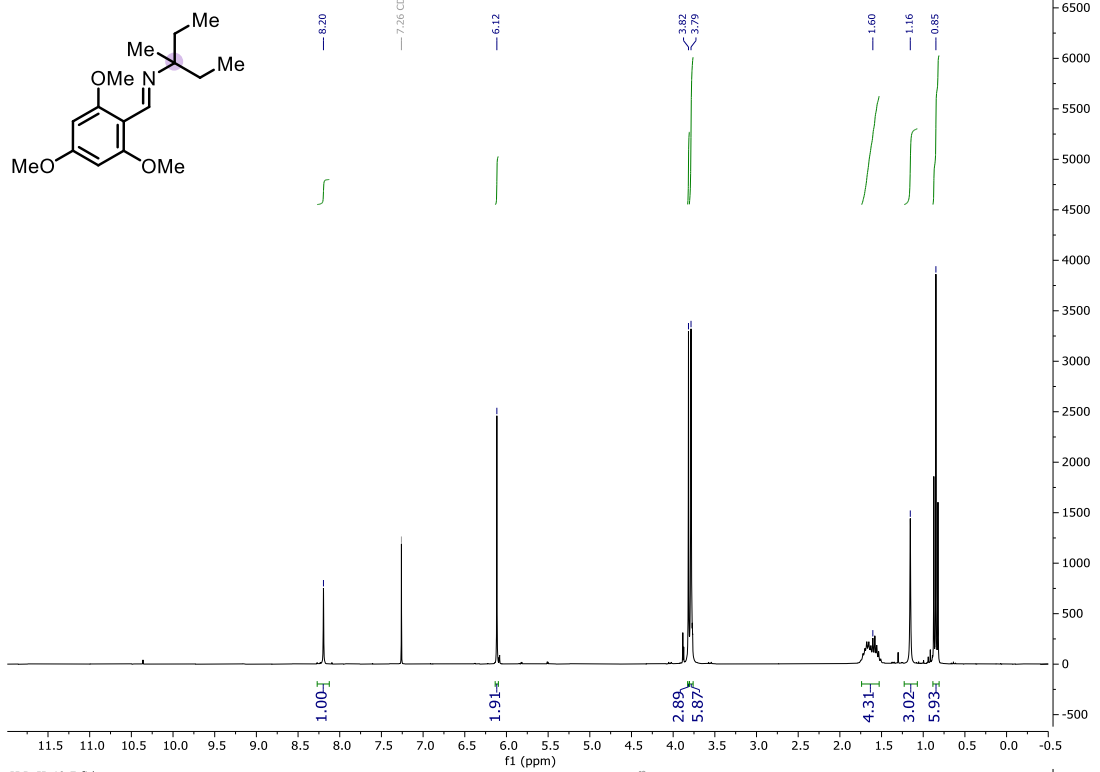

JRD-II-40.5.fid  
Carbon 13

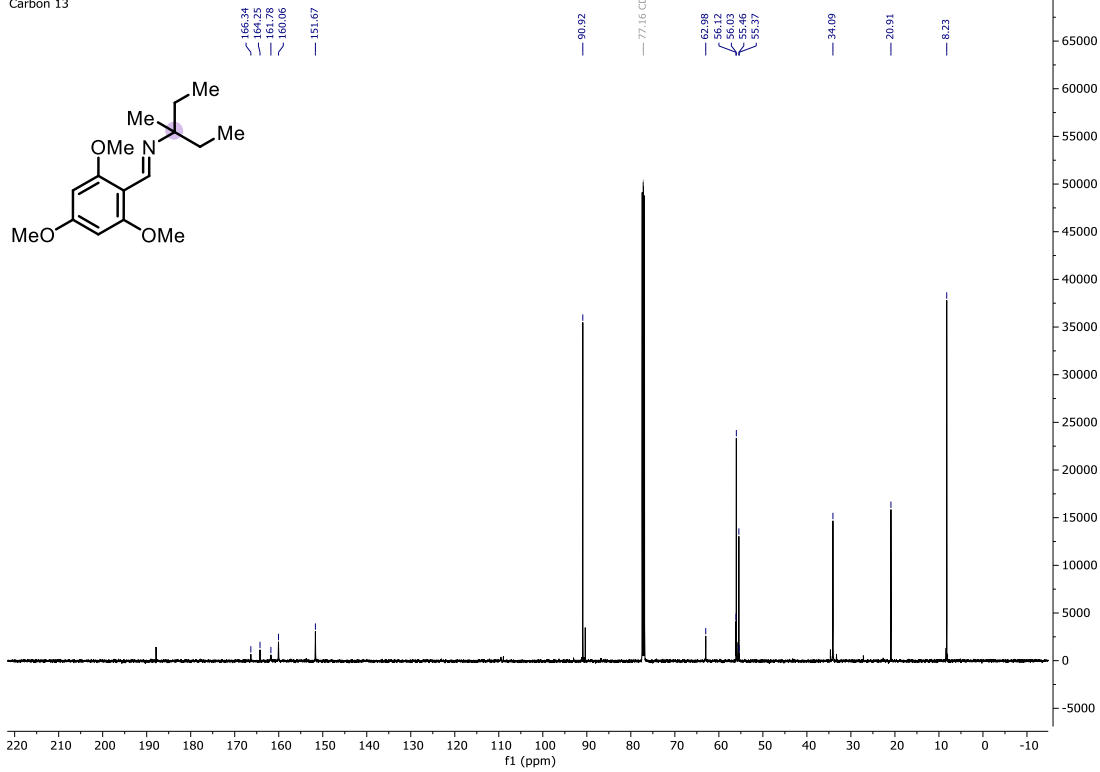



JRD-II-61-check.2.fid  
Proton

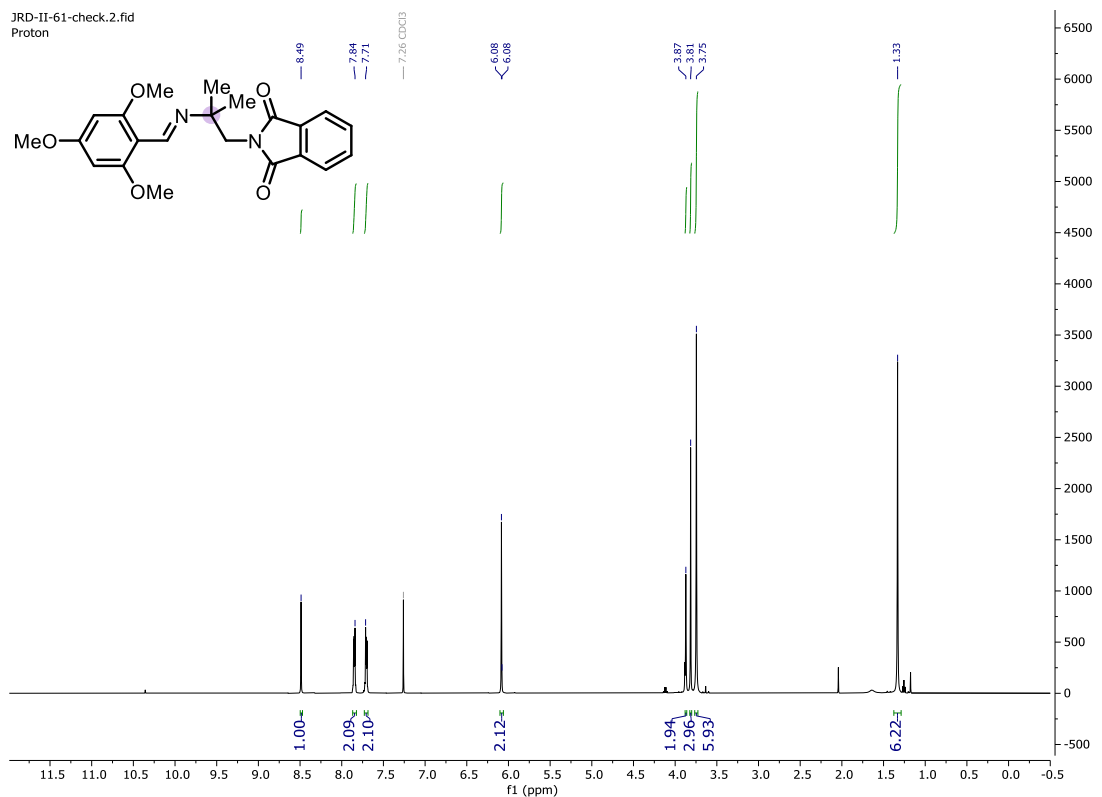

JRD-61-C.1.fid  
Carbon 13

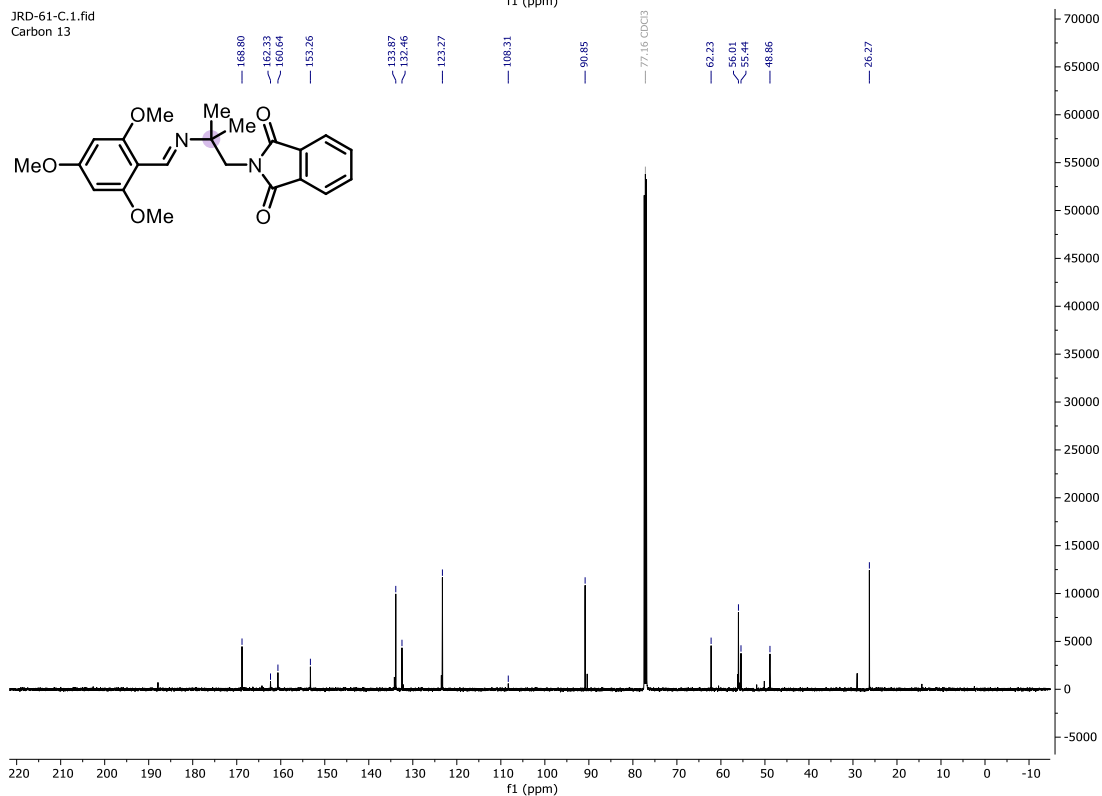

JRD-II-462.2.fid  
Proton

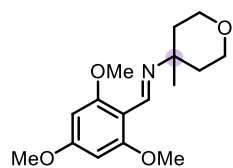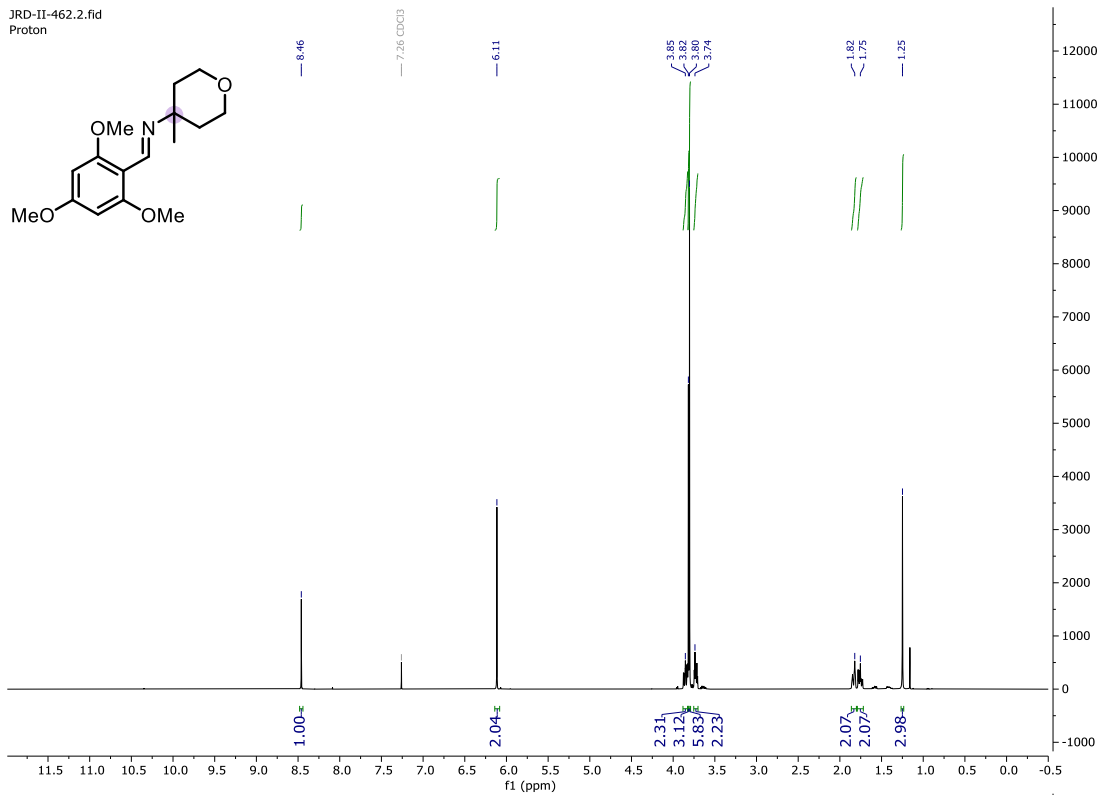

JRD-II-462.3.fid  
Carbon 13

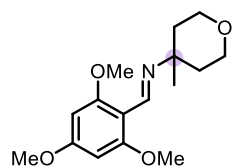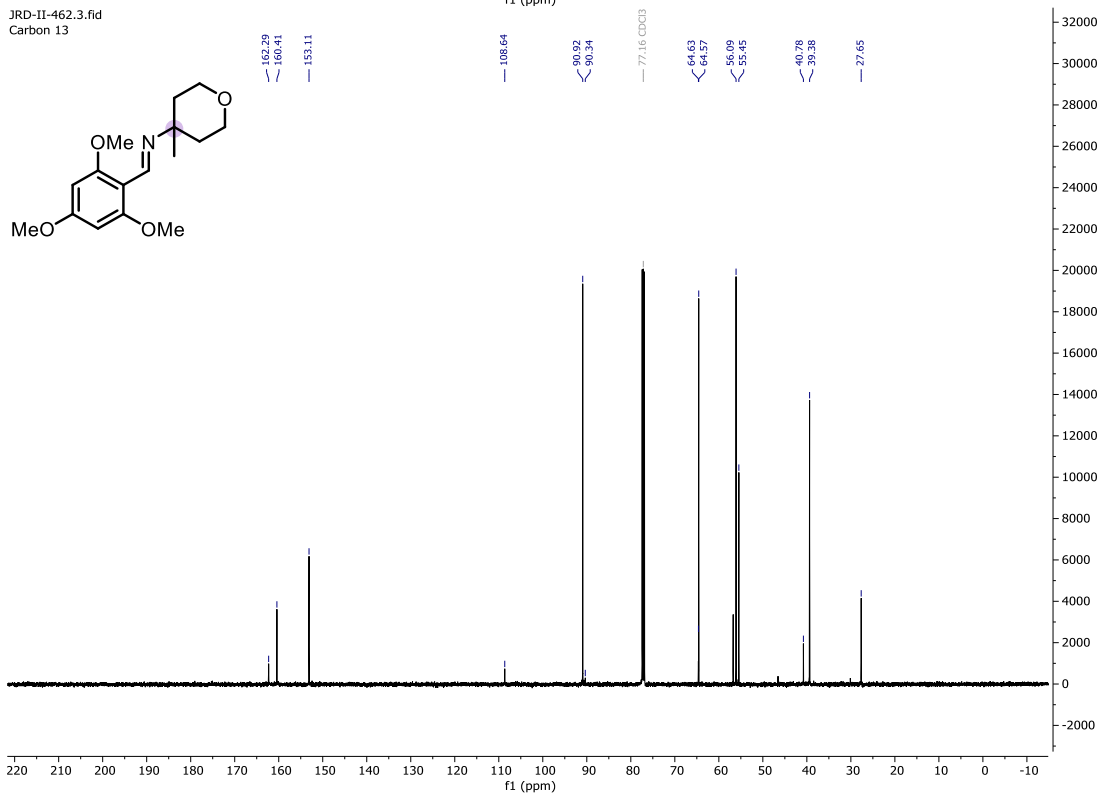

JRD-II-228.1.fid  
proton

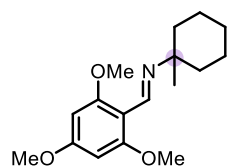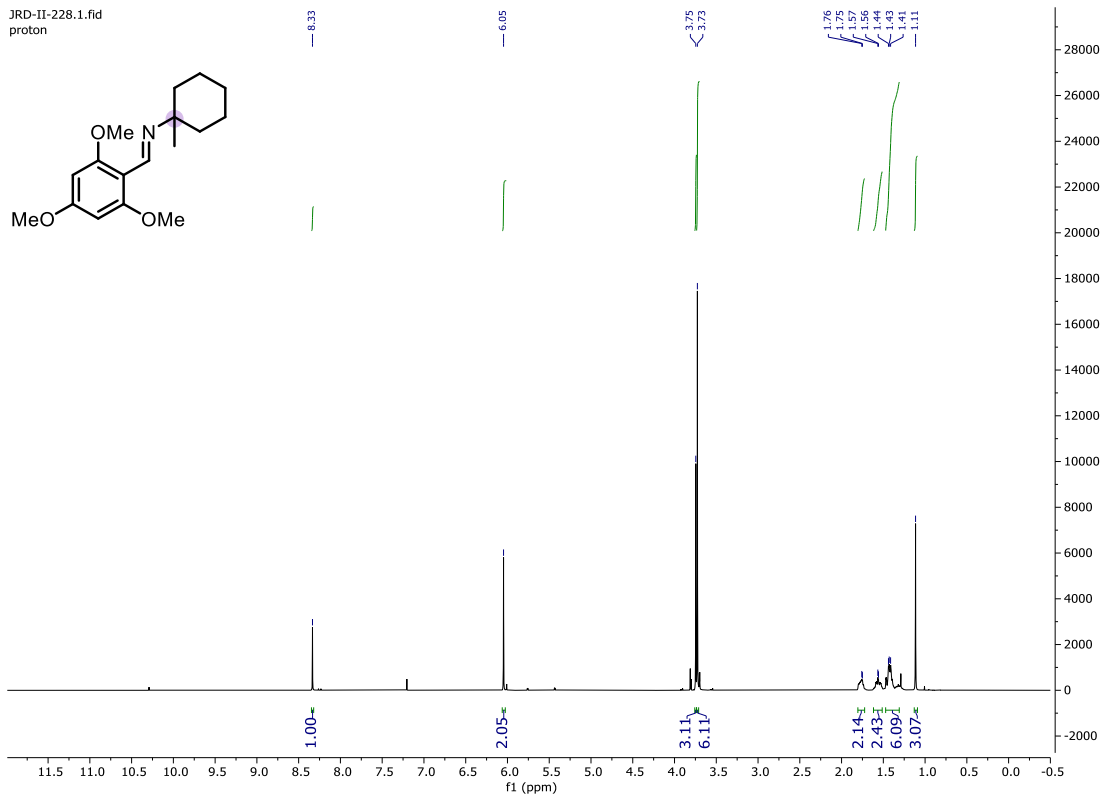

JRD-II-228.2.fid

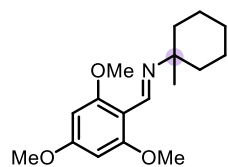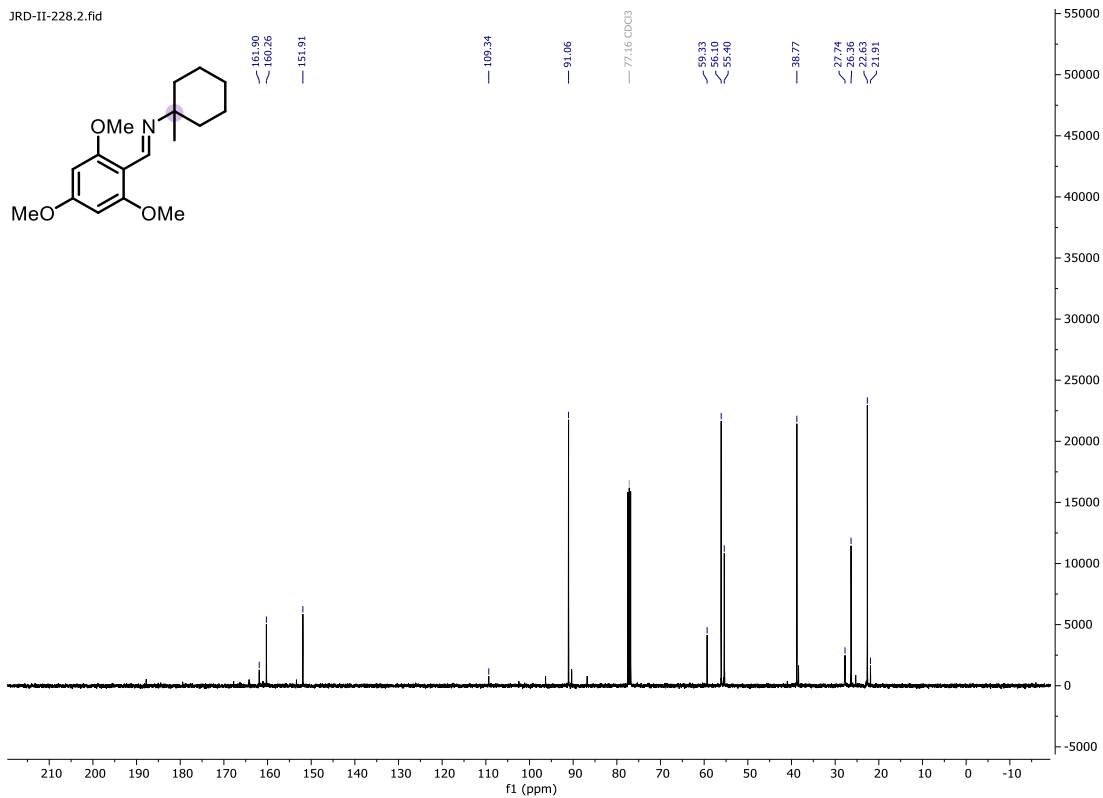

JRD-II-149.4.fid  
proton

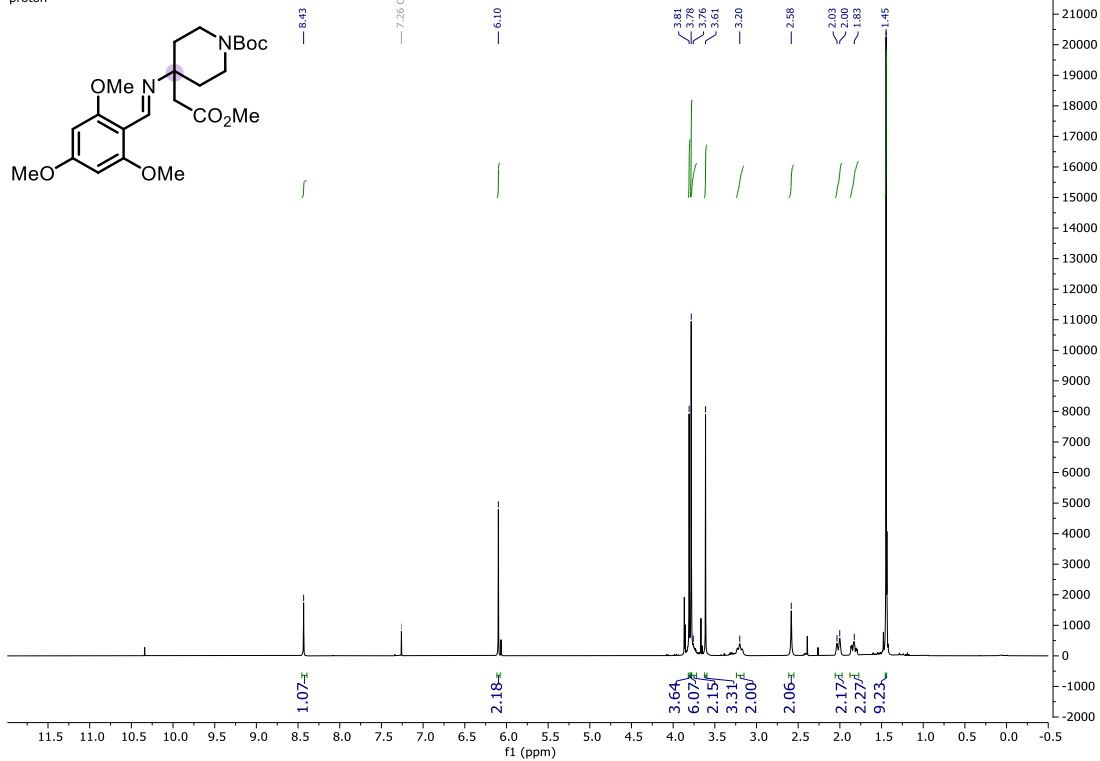

JRD-II-149.5.fid

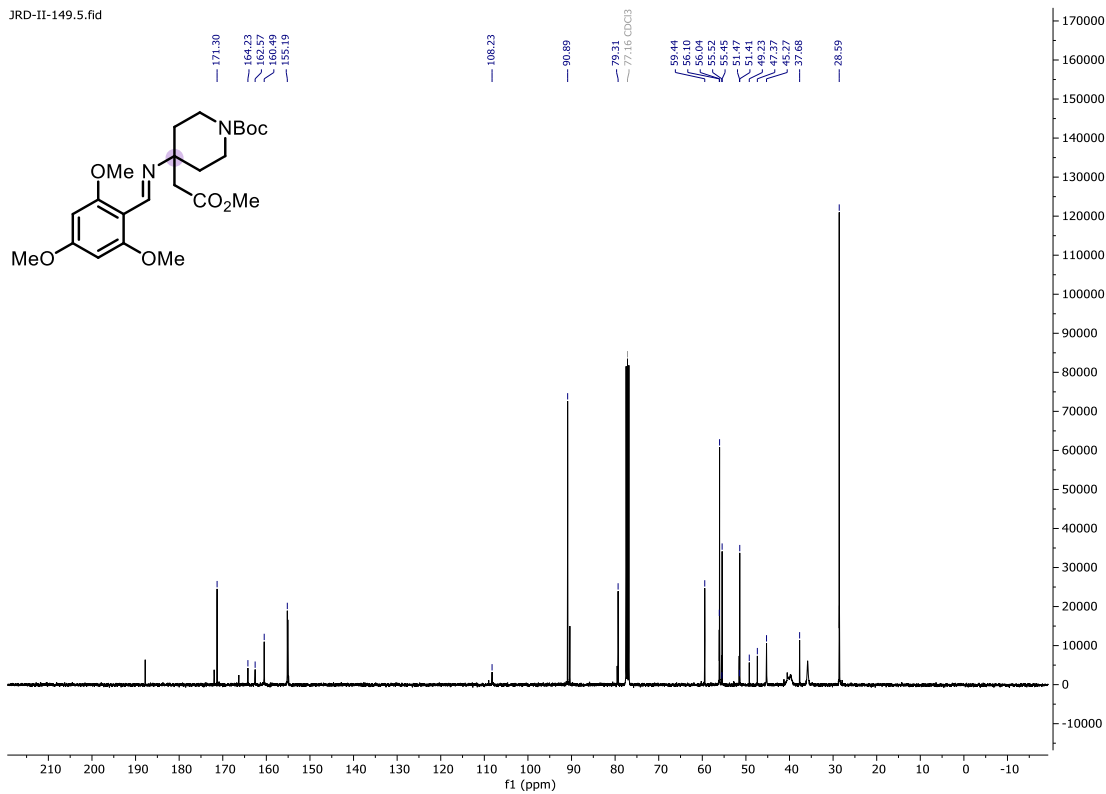

JRD-II-137.2.fid  
Proton

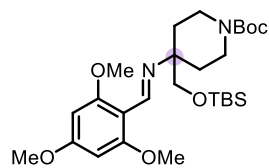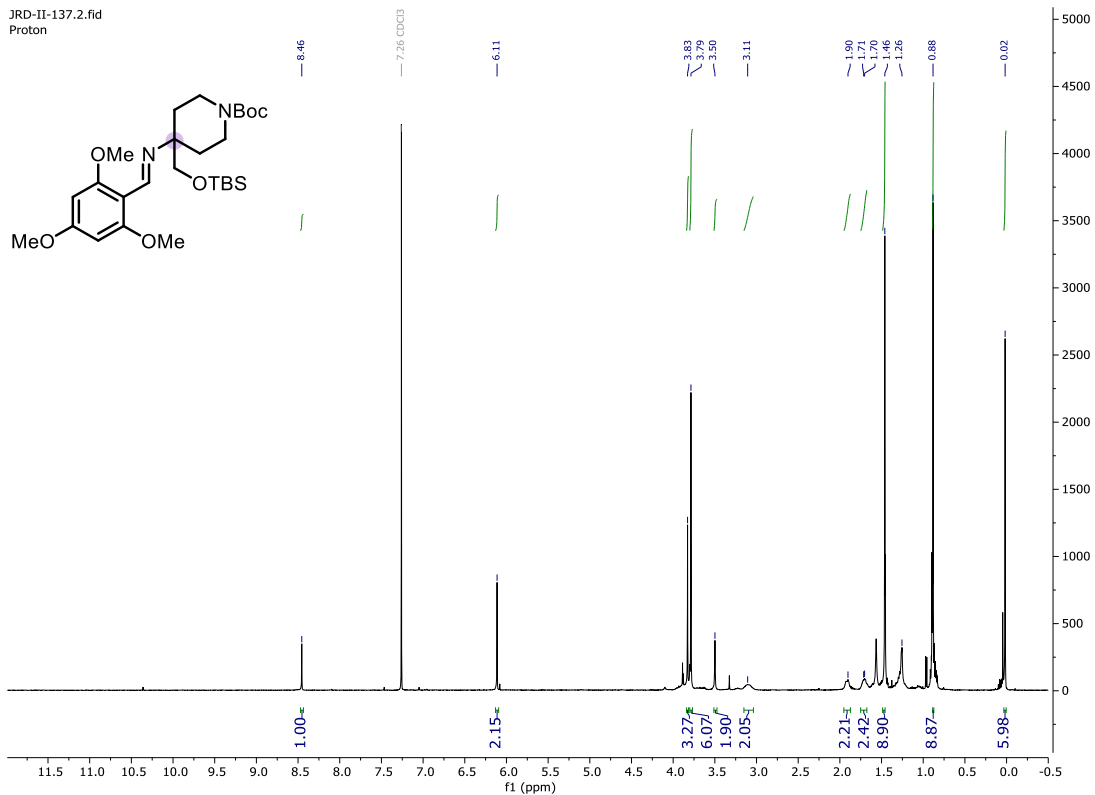

JRD-II-137.3.fid  
Carbon 13

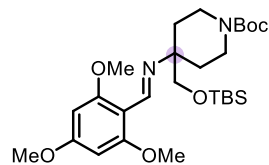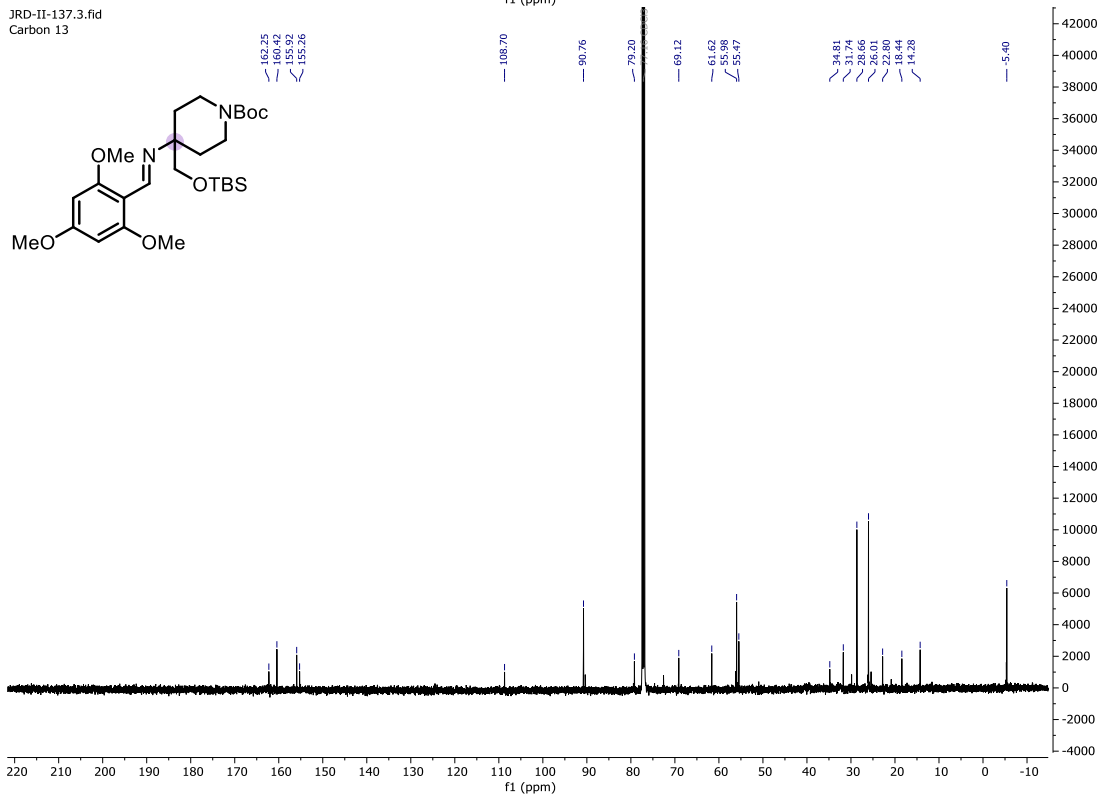

JRD-399-2ac.1.fid  
Proton

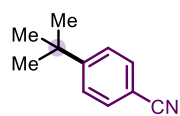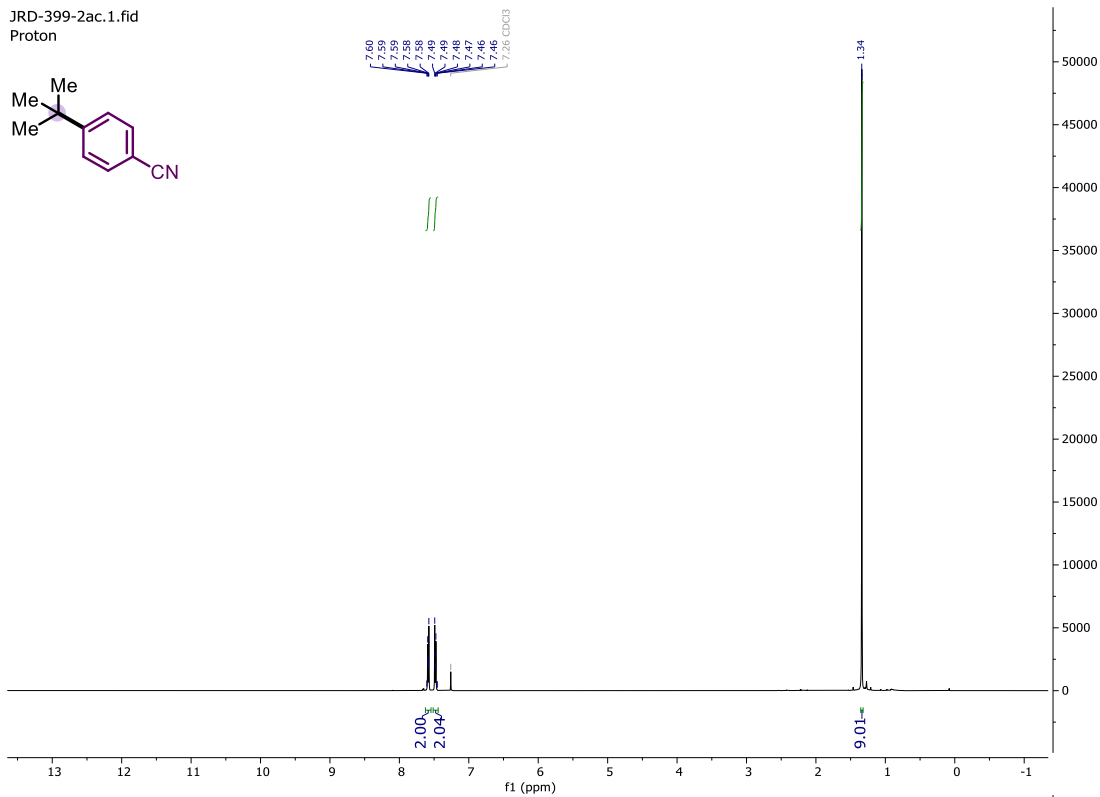

JRD-399-2acC.1.fid  
Carbon 13

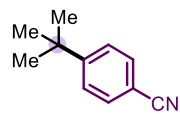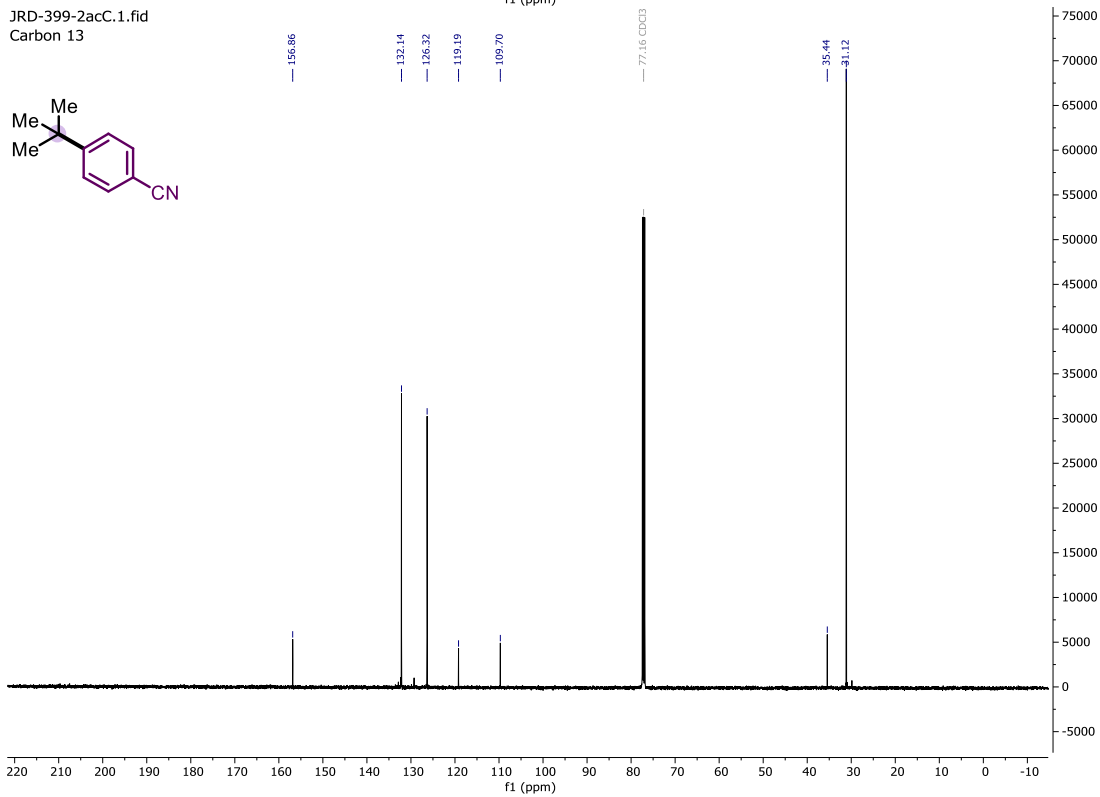

JRD-391-1ac.1.1.1r  
Proton

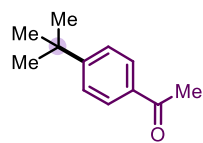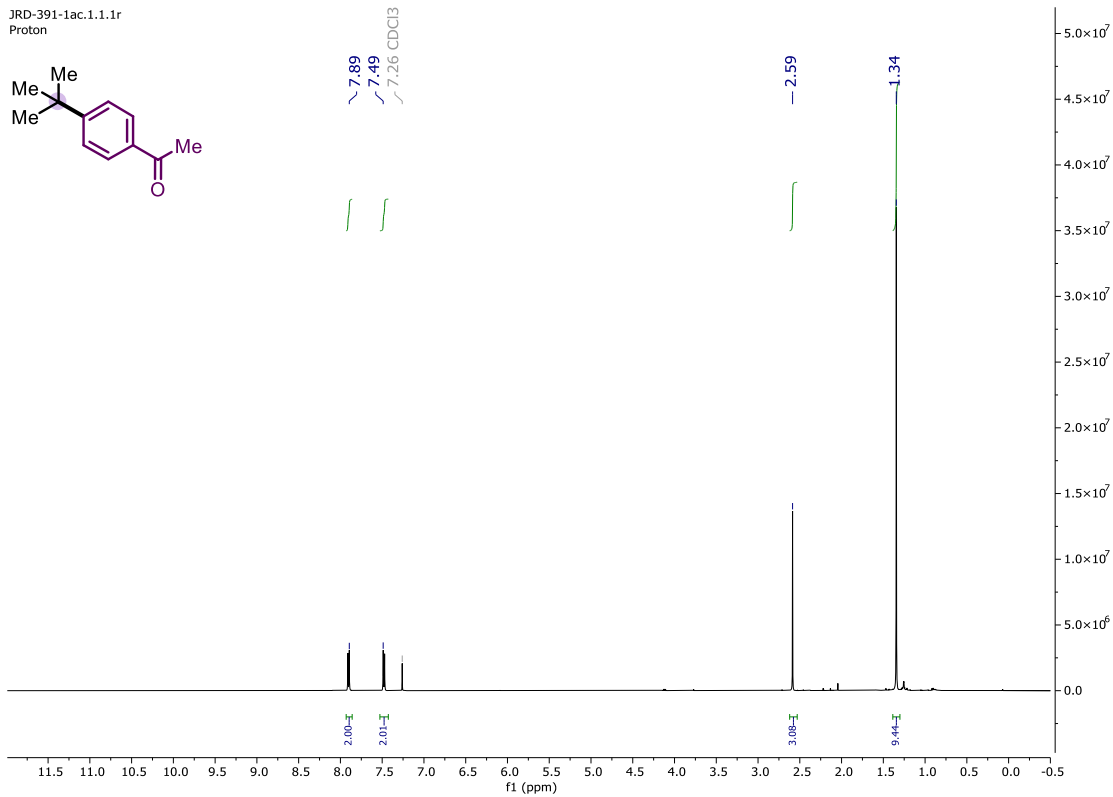

JRD-391-acC.1.fid  
Carbon 13

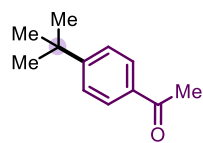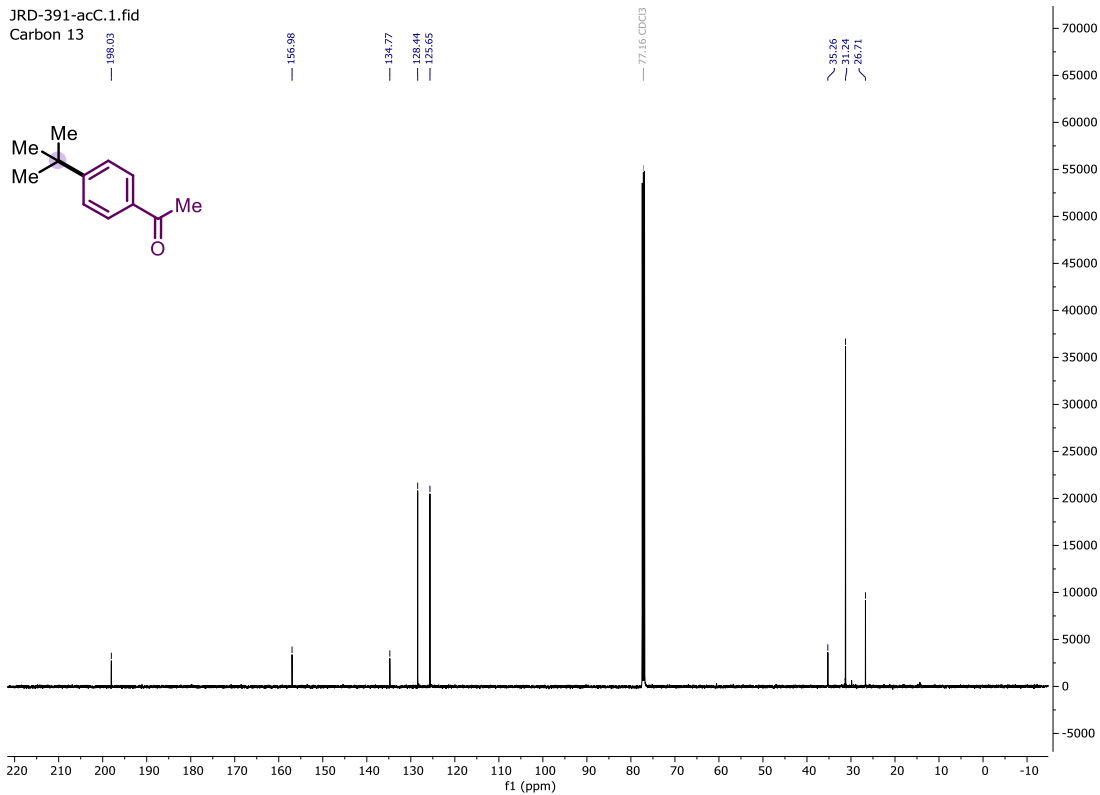

JRD-438-3-ac3.1.fid  
Proton

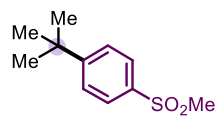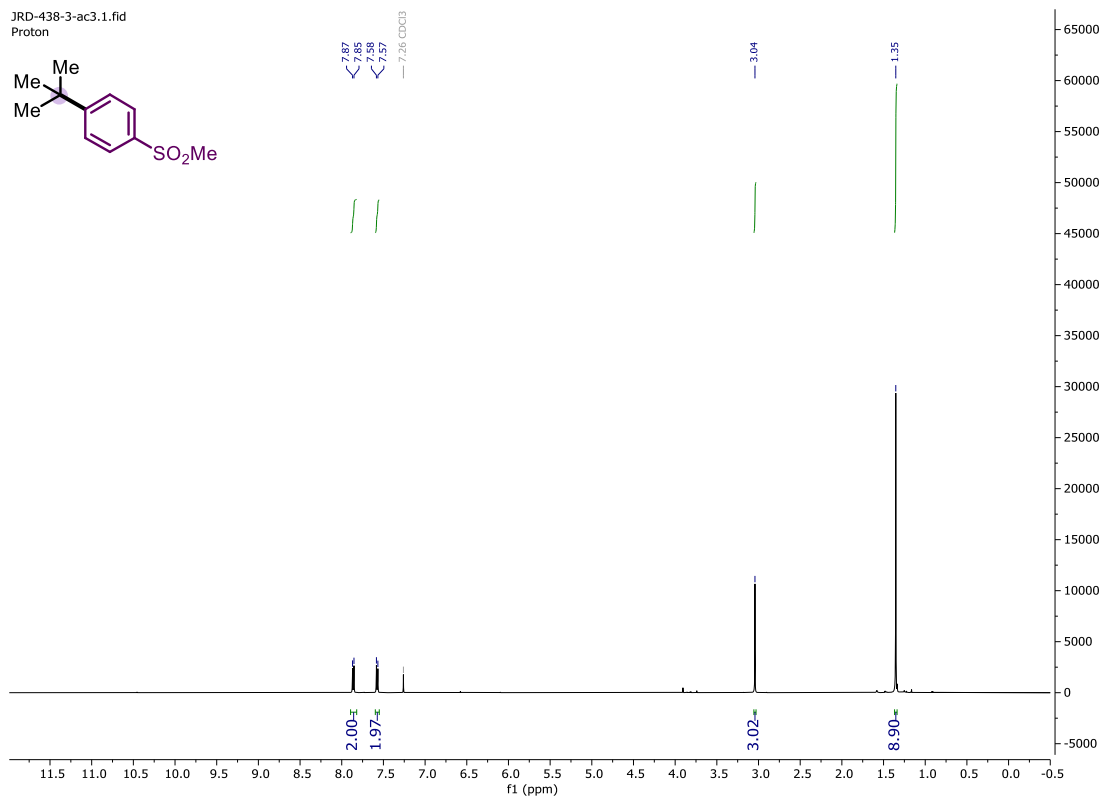

JRD-438-3-ac3carbon.1.fid  
Carbon 13

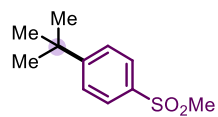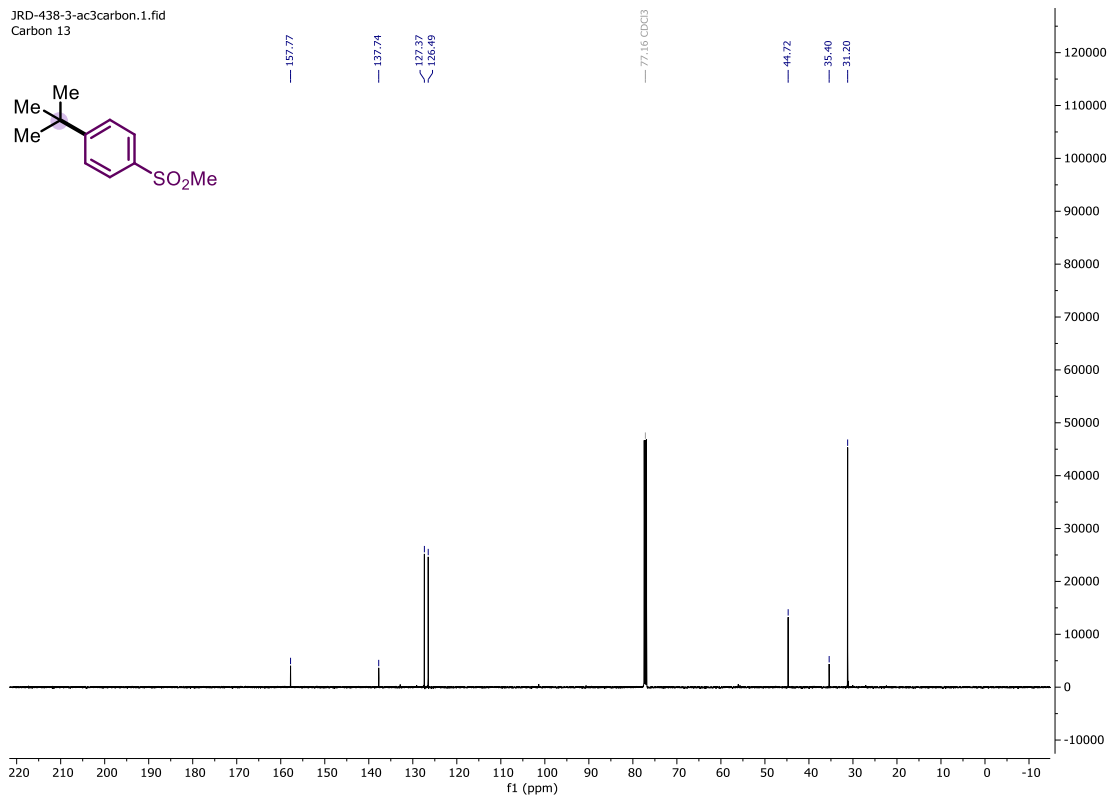



JRD-II-22-3-ac.1.fid  
Proton

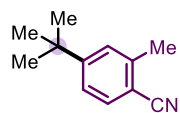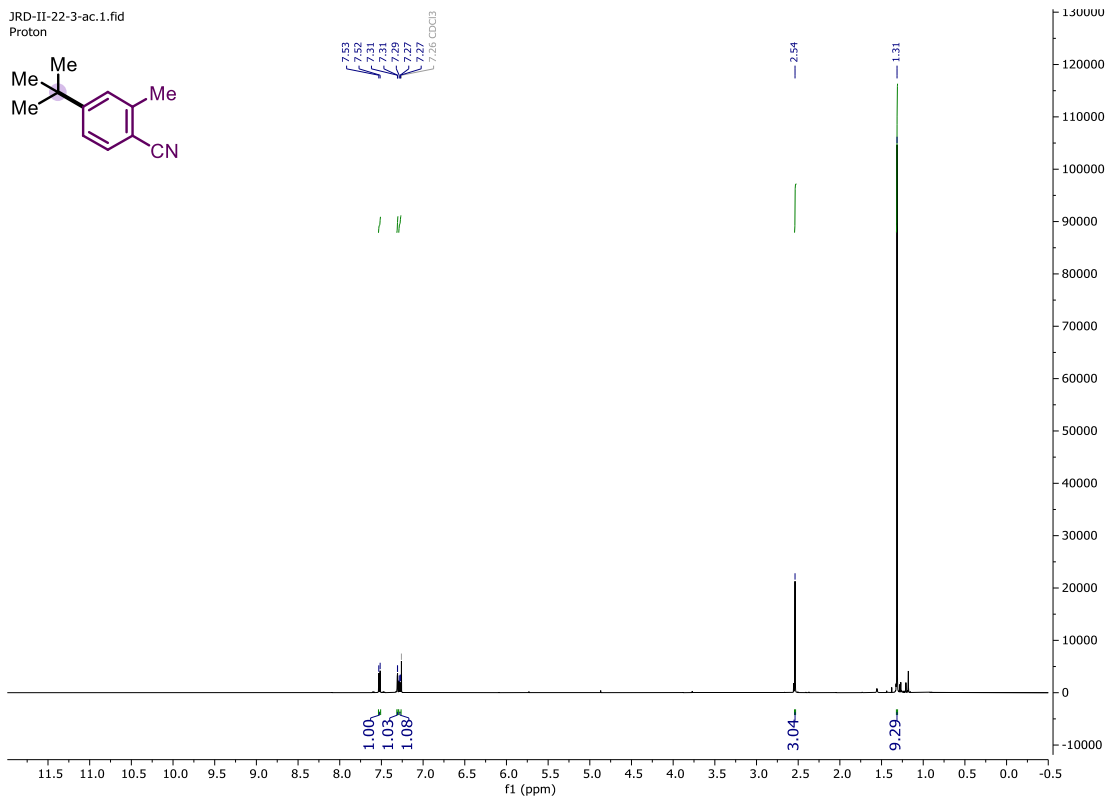

JRD-II-22-3-ac.2.fid  
Carbon 13

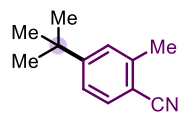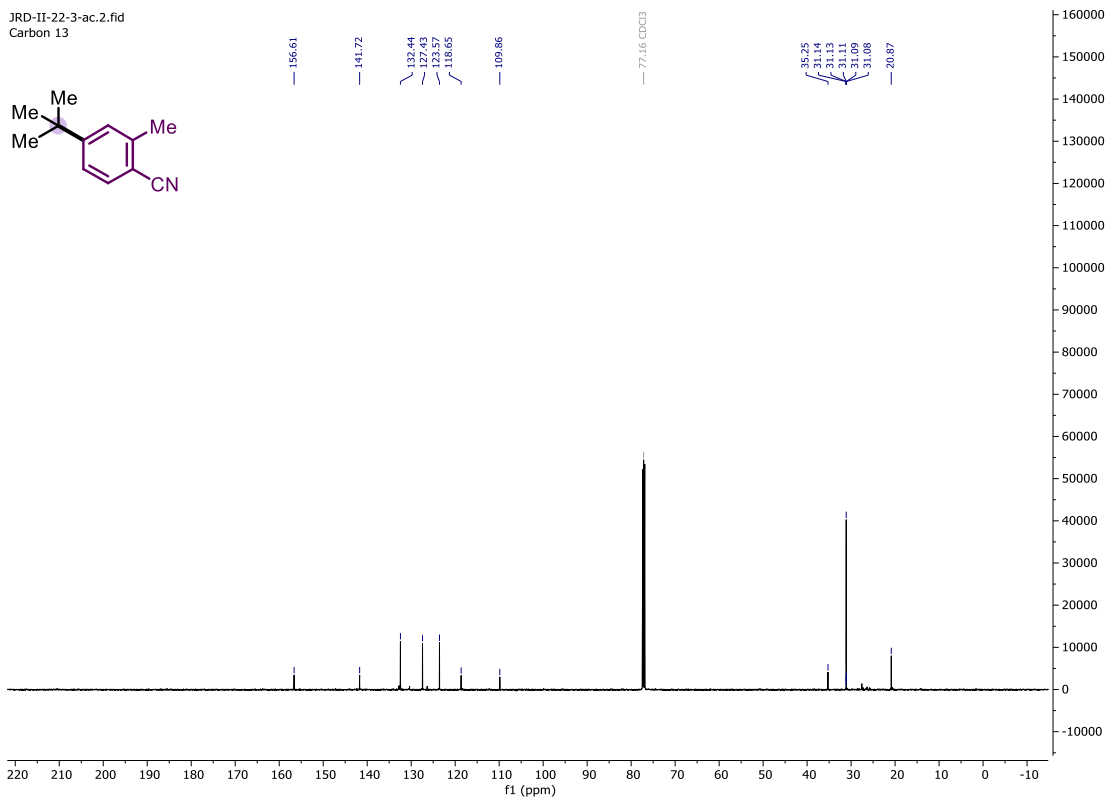

JRD-II-22-1-ac.1.fid  
Proton

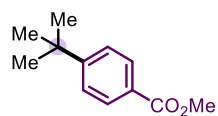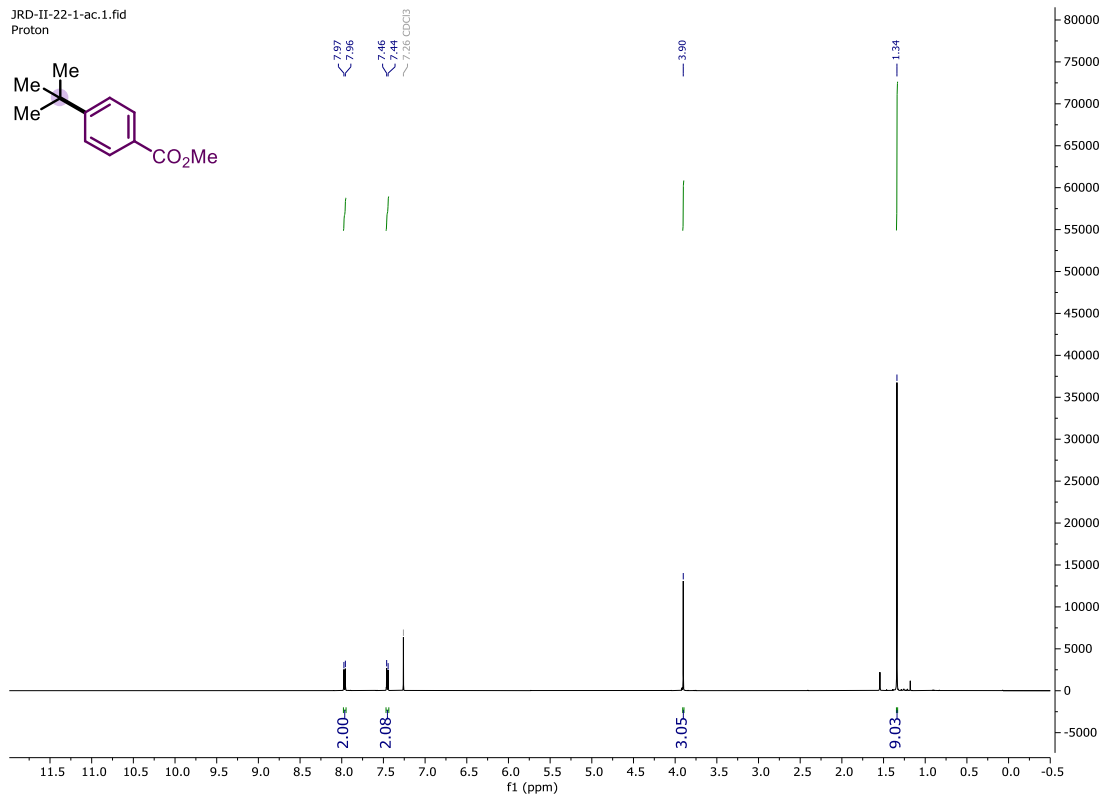

JRD-II-22-1-ac.2.fid  
Carbon 13

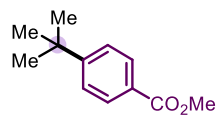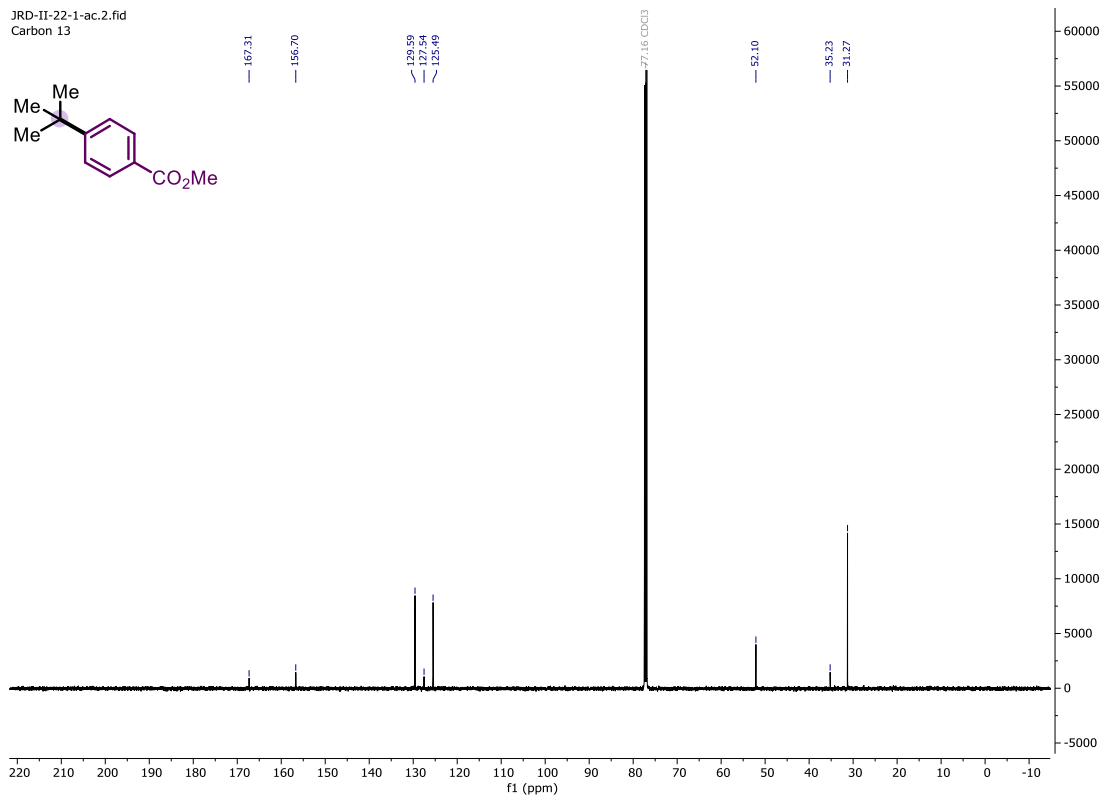

JRD-II-28-3-ac-2.1.fid  
Proton

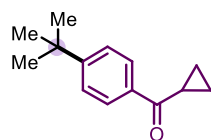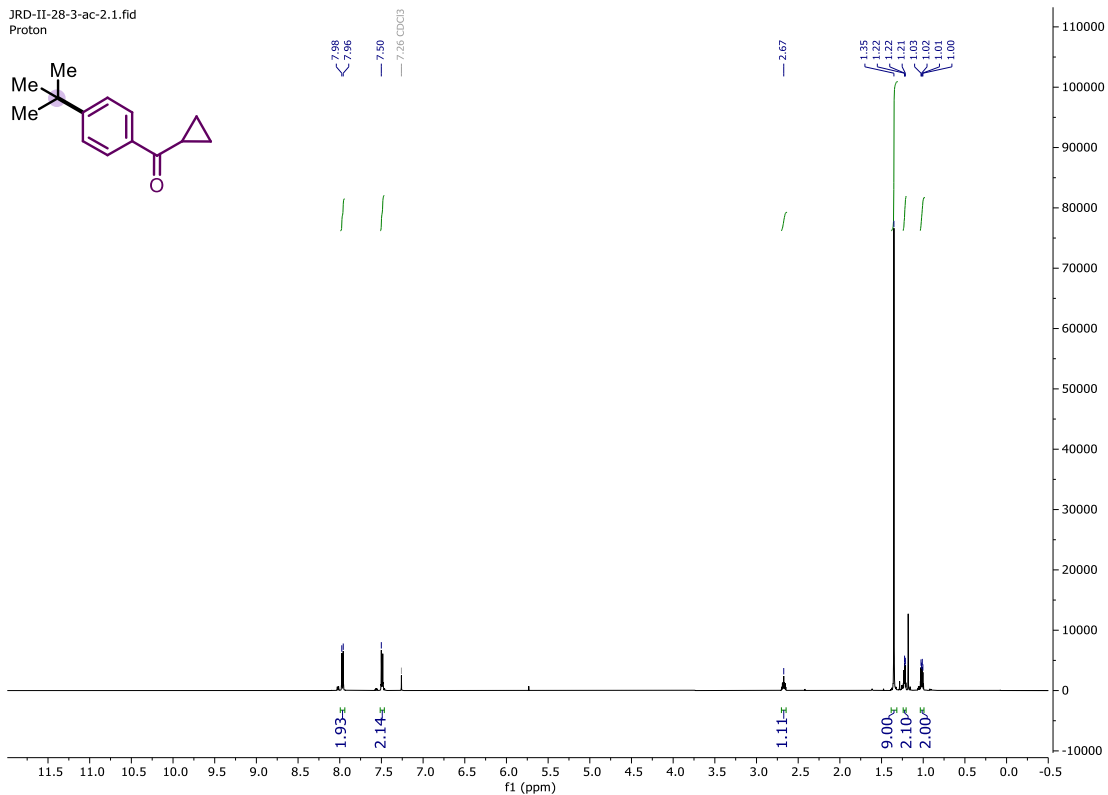

JRD-II-28-3-ac-2.2.fid  
Carbon 13

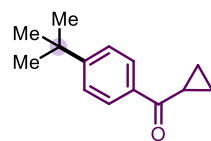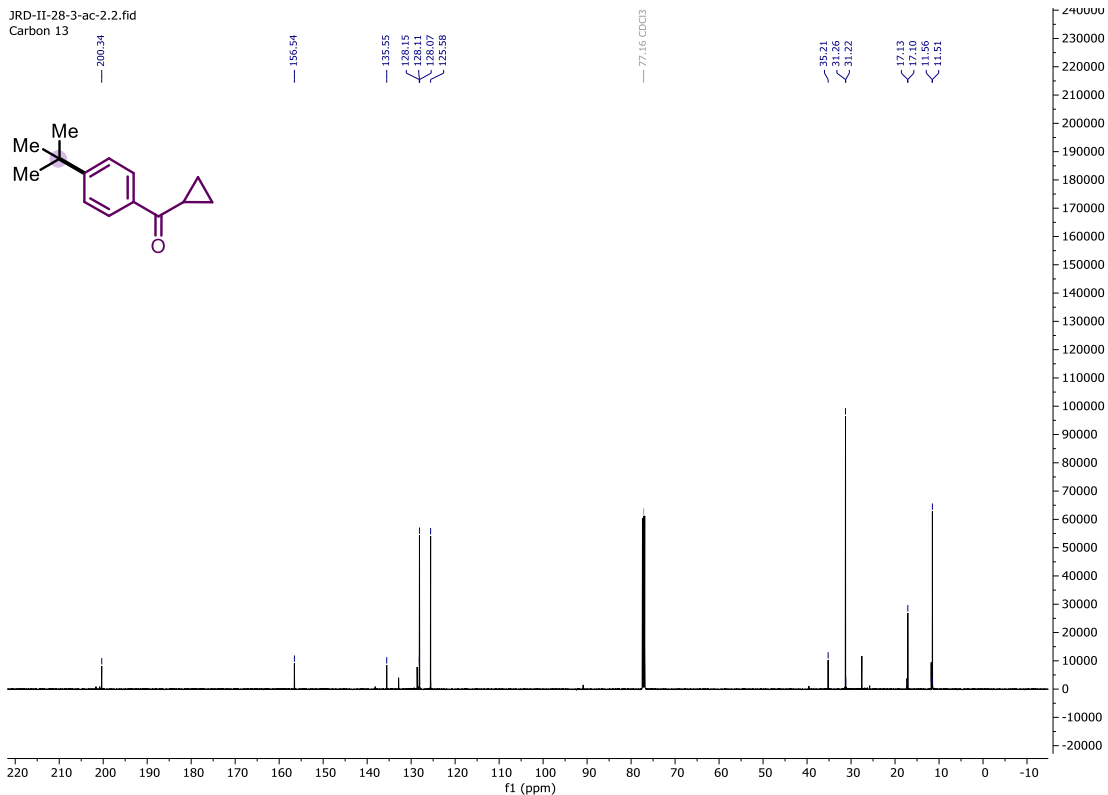

JRD-II-81-1-ac.1.fid  
proton

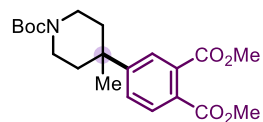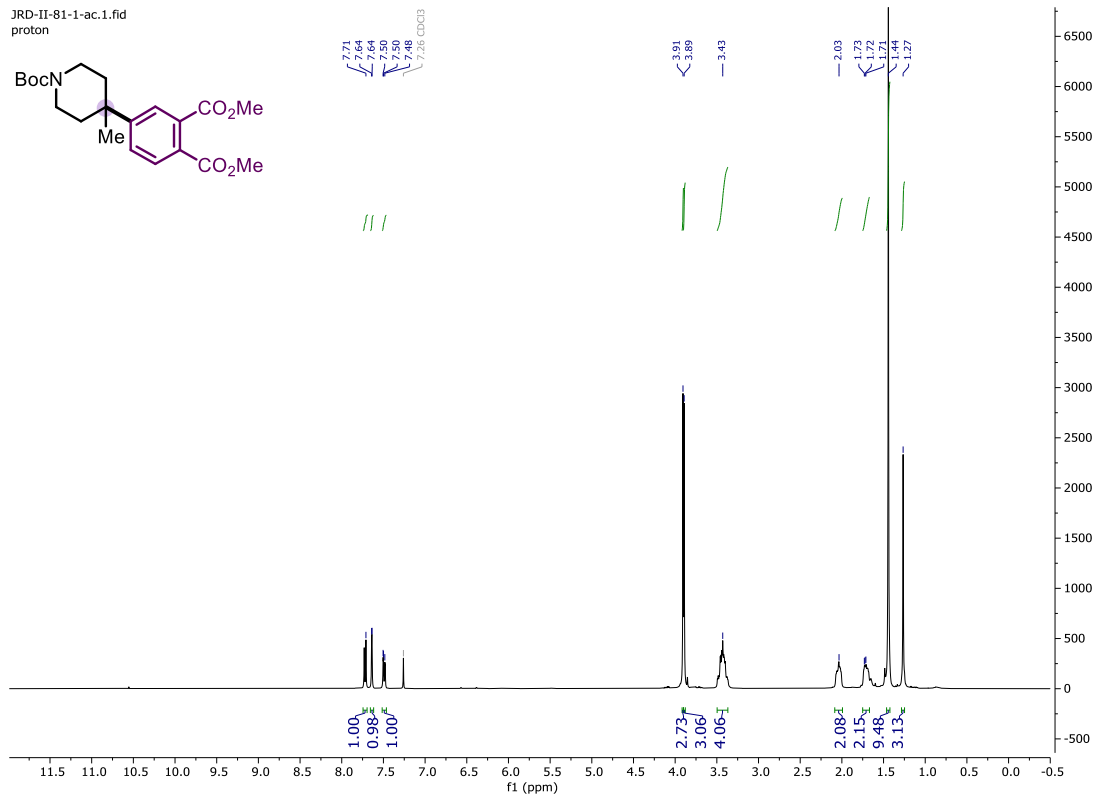

JRD-II-81-1-ac.2.fid

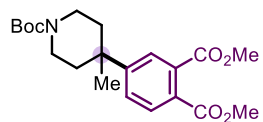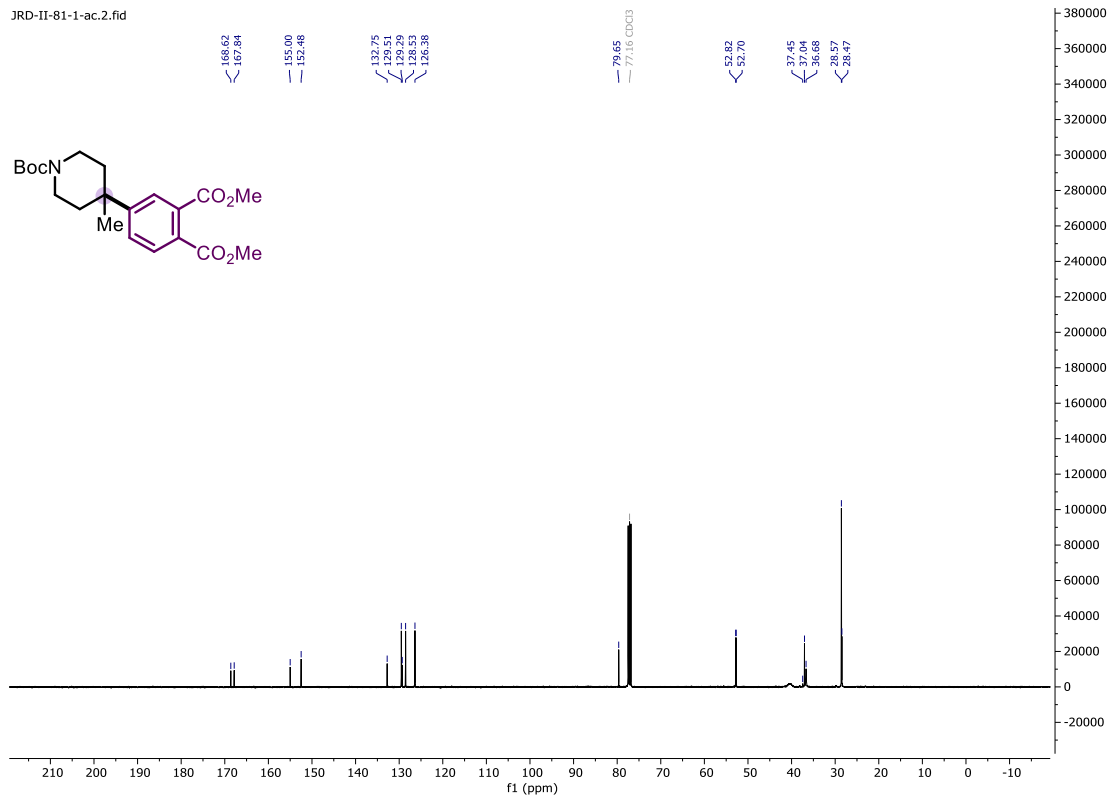

JRD-II-25-ac1.1.fid  
Proton

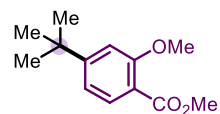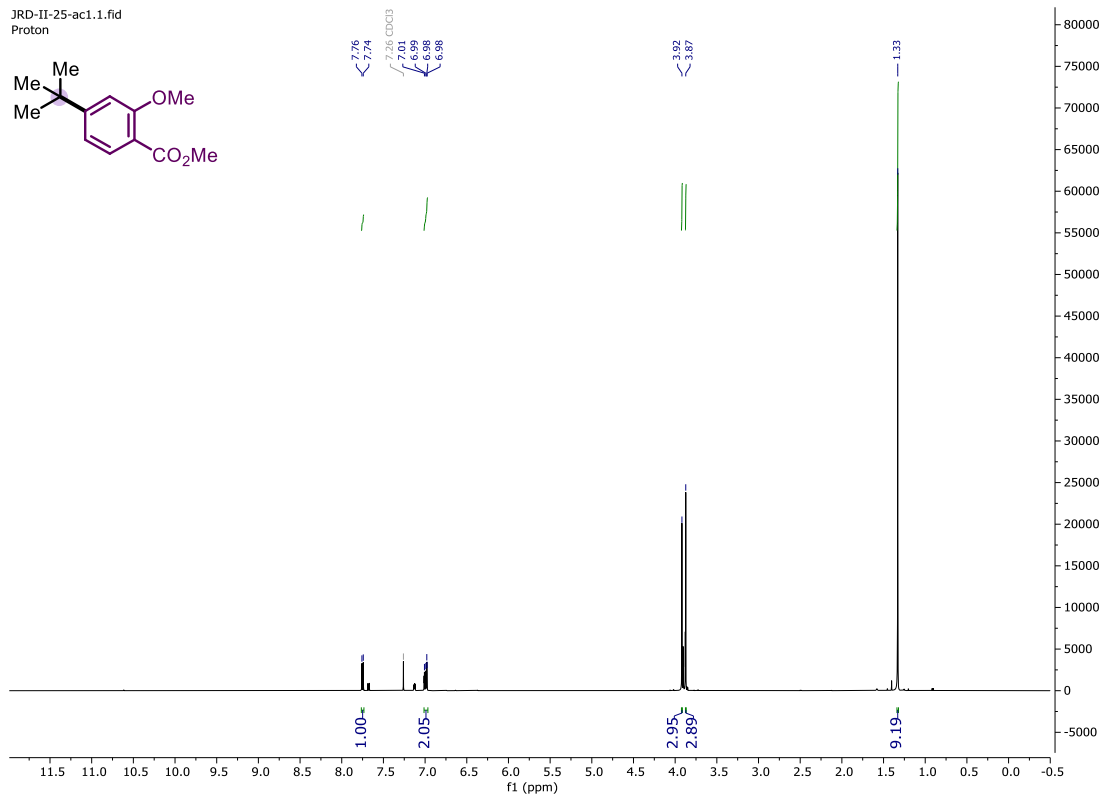

JRD-II-25-ac1.2.fid  
Carbon 13

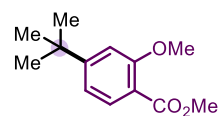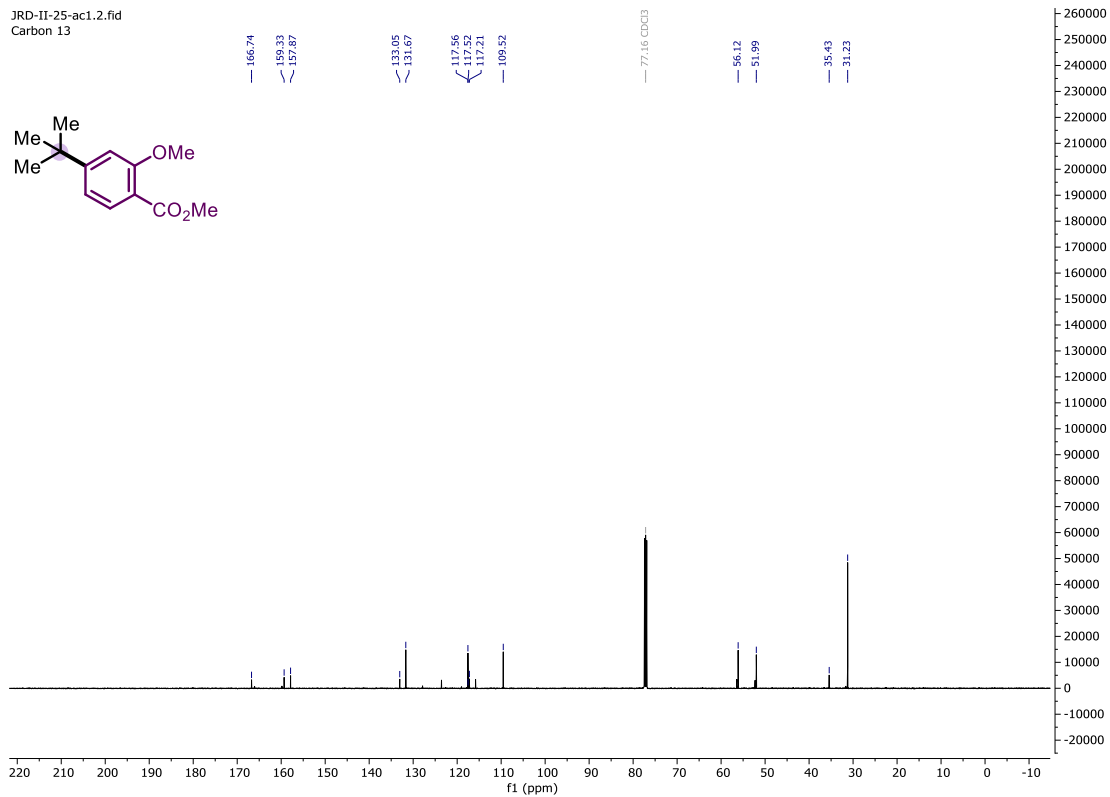

JRD-II-111-ac.3.fid  
Proton

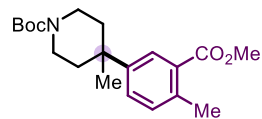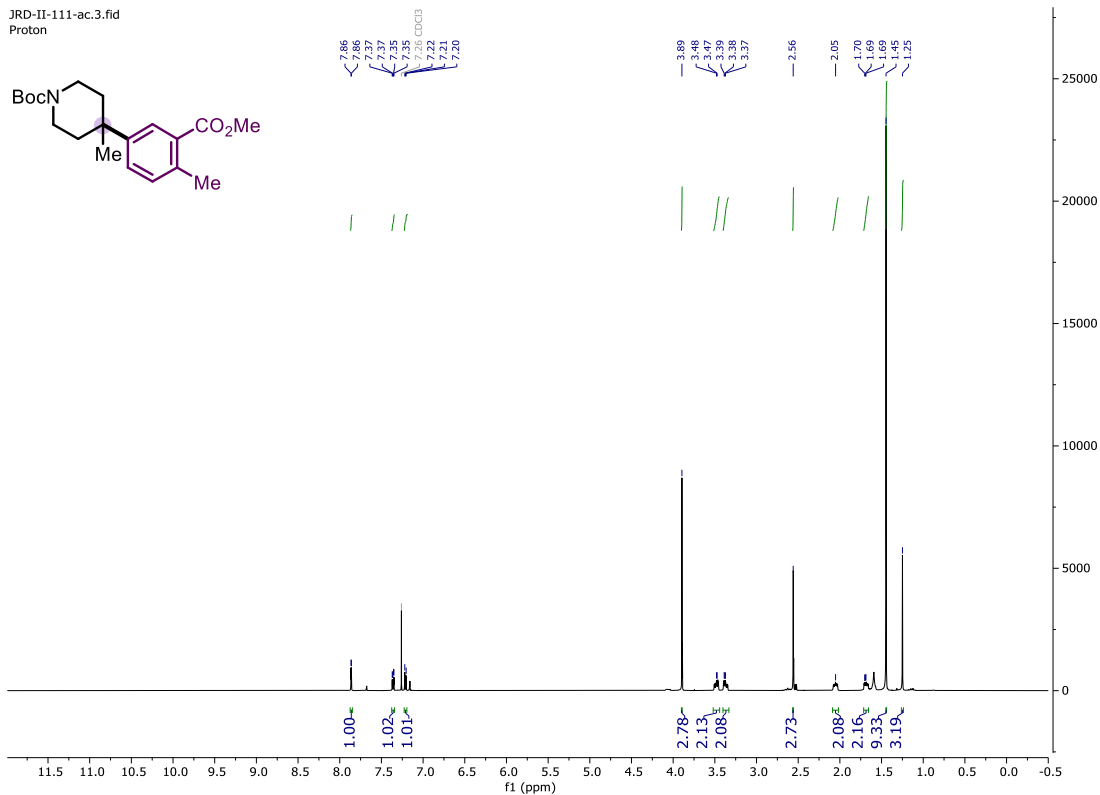

JRD-II-111-ac.2.fid

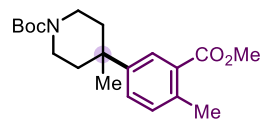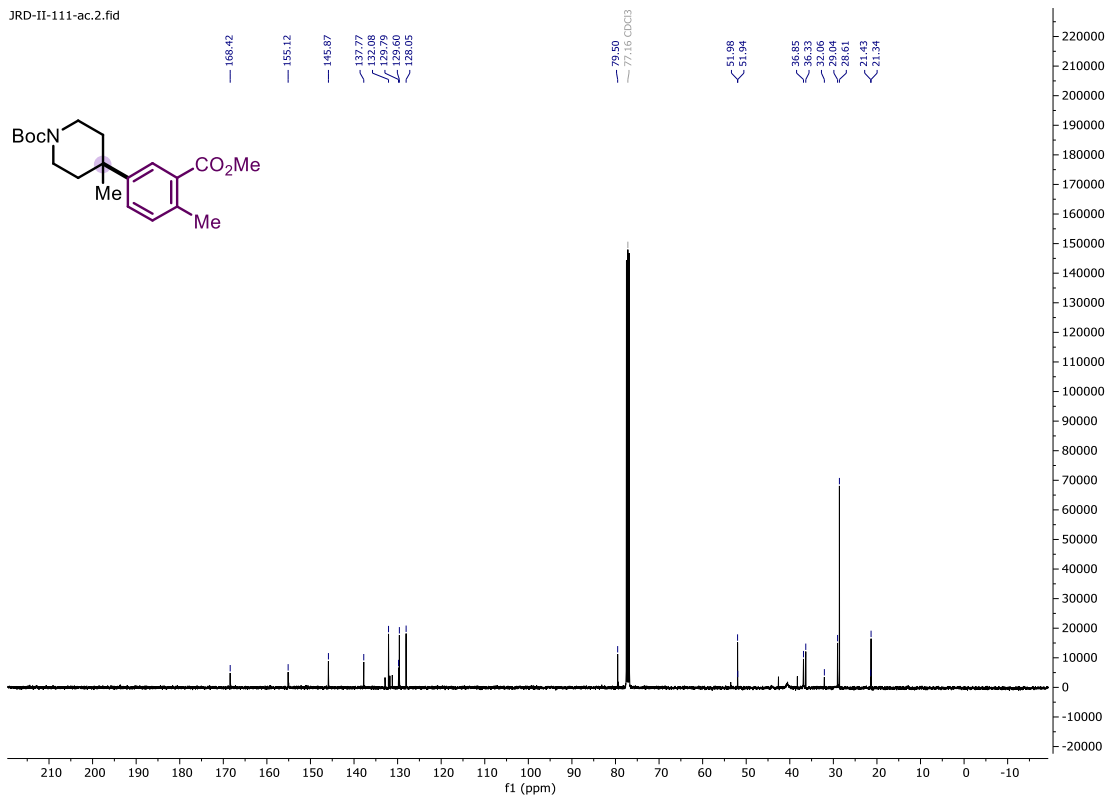

JRD-II-25-1-ac.1.fid  
Proton

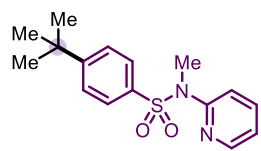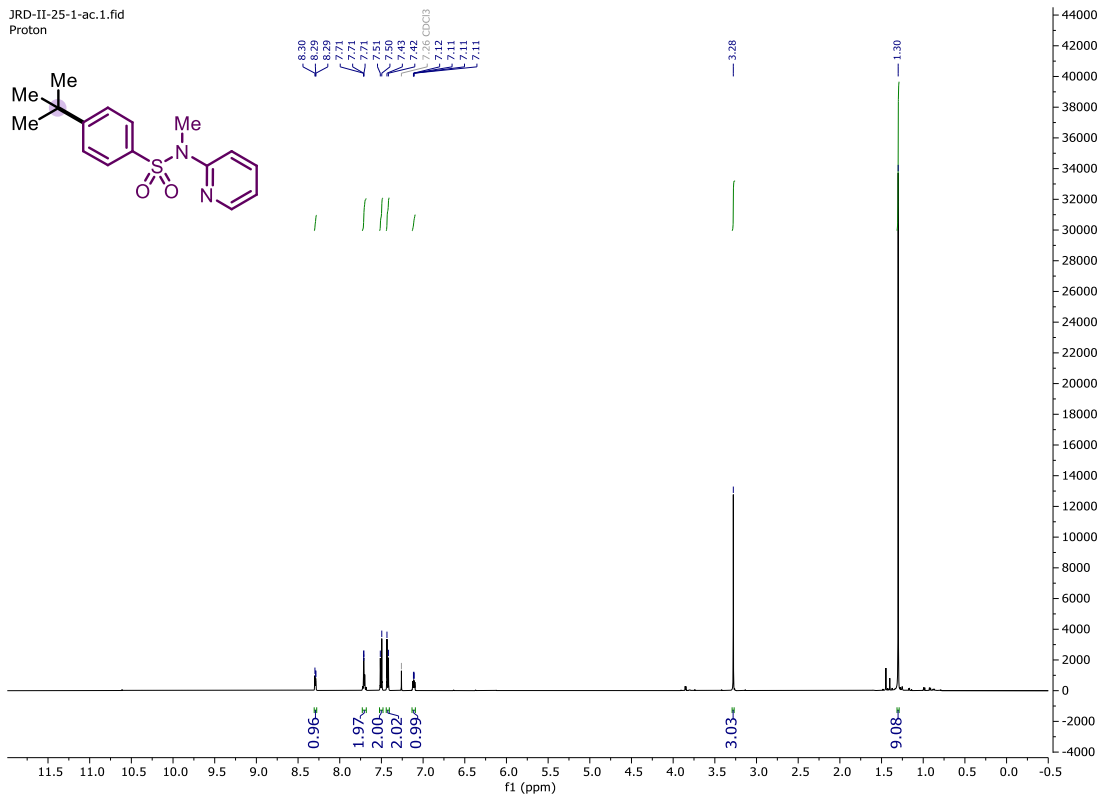

JRD-II-25-1-ac.2.fid  
Carbon 13

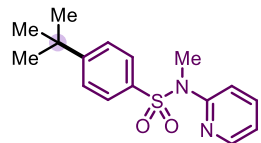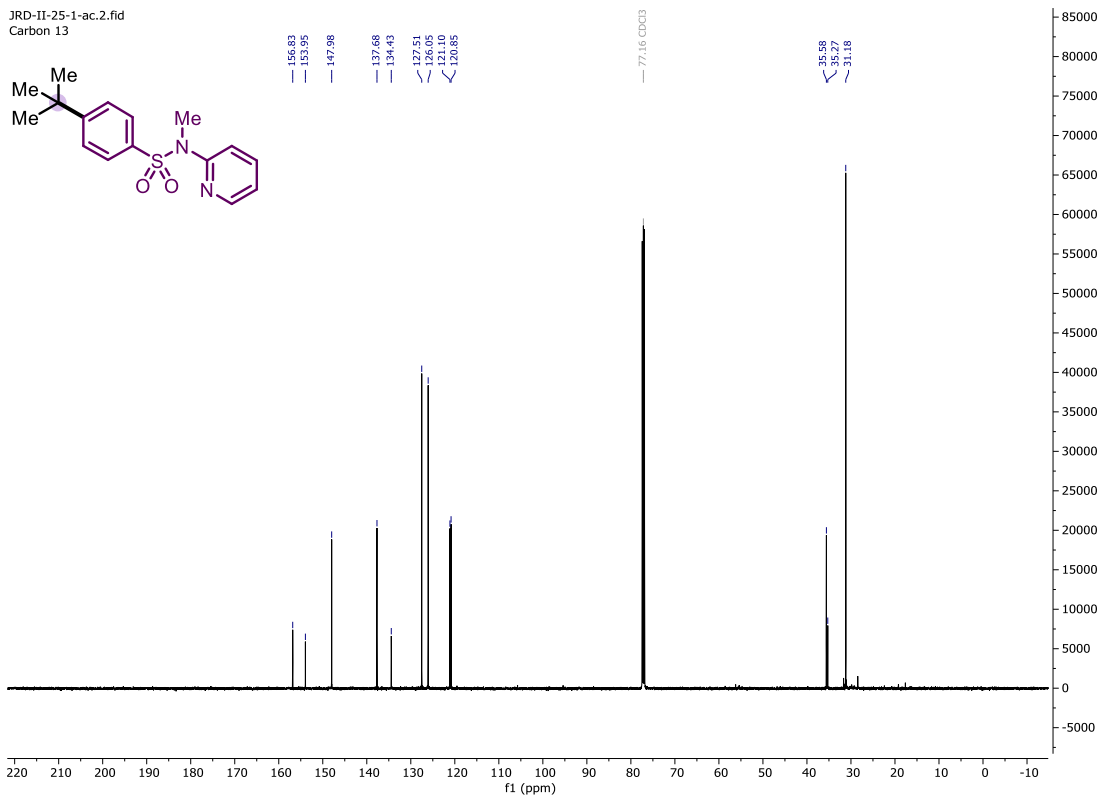

JRD-II-24-3-ac.1.fid  
proton

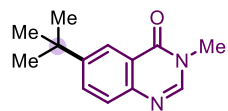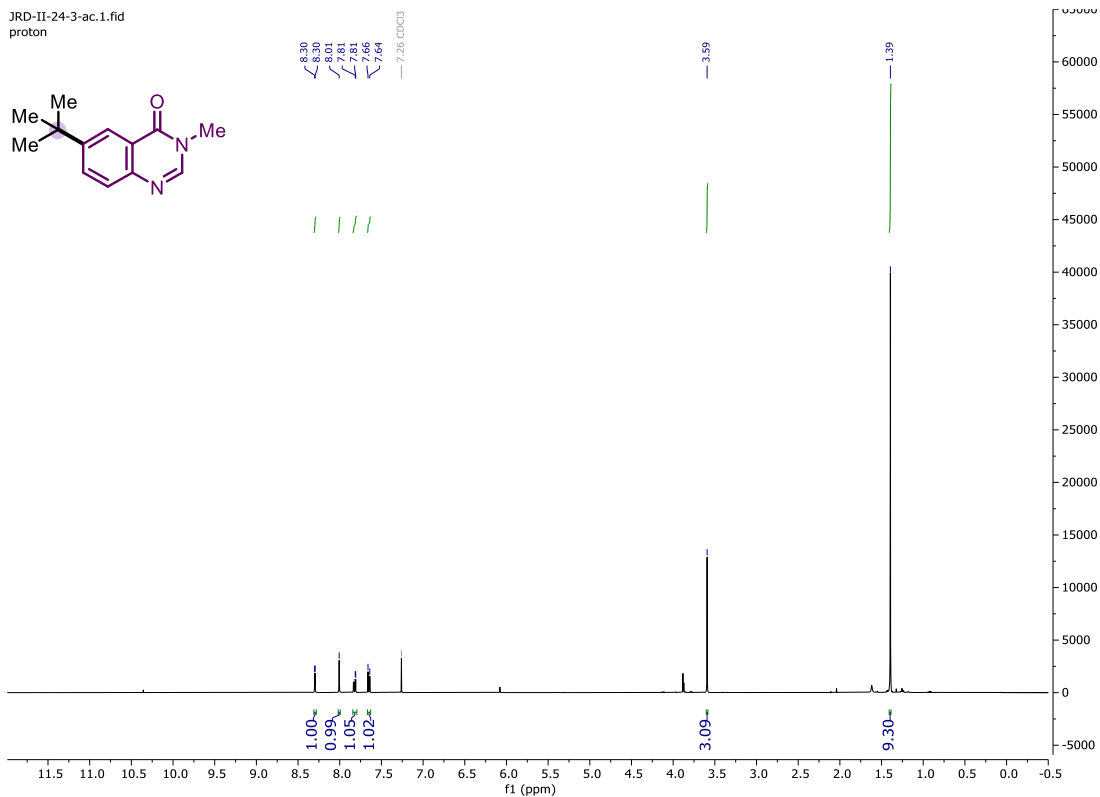

JRD-II-24-3-ac.2.fid

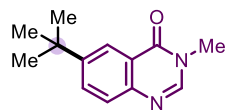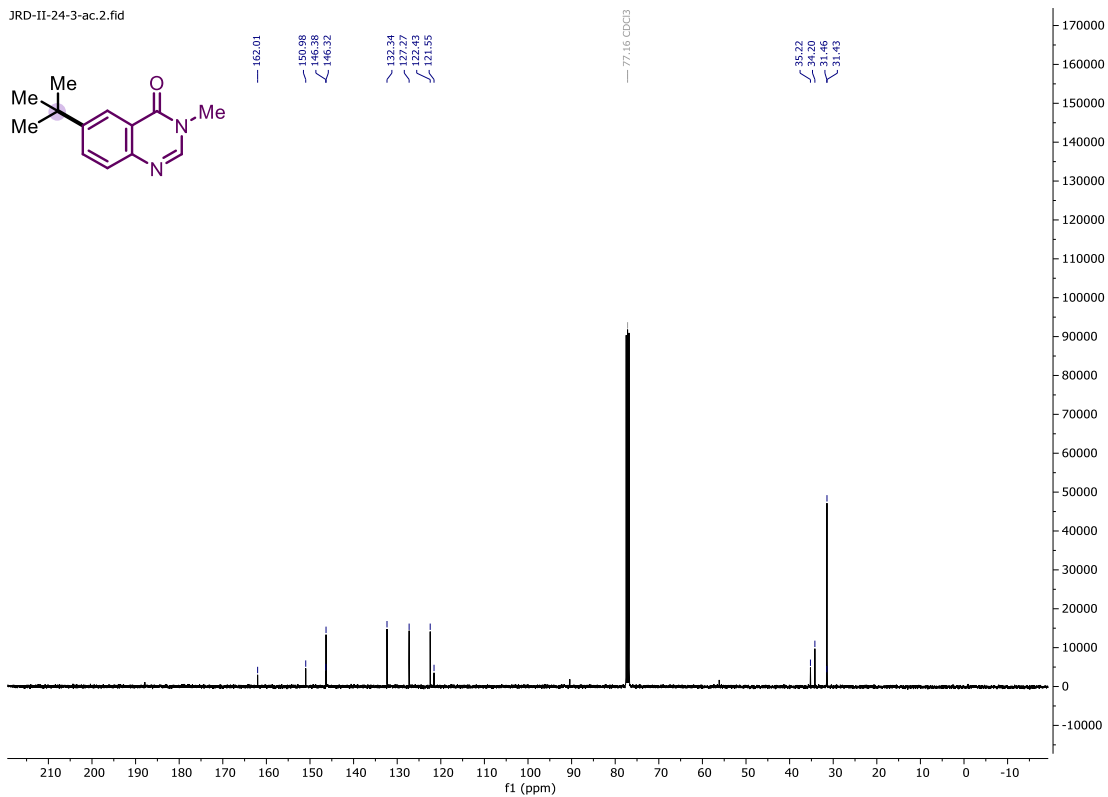



JRD-II-139-3-ac.1.fid  
Proton

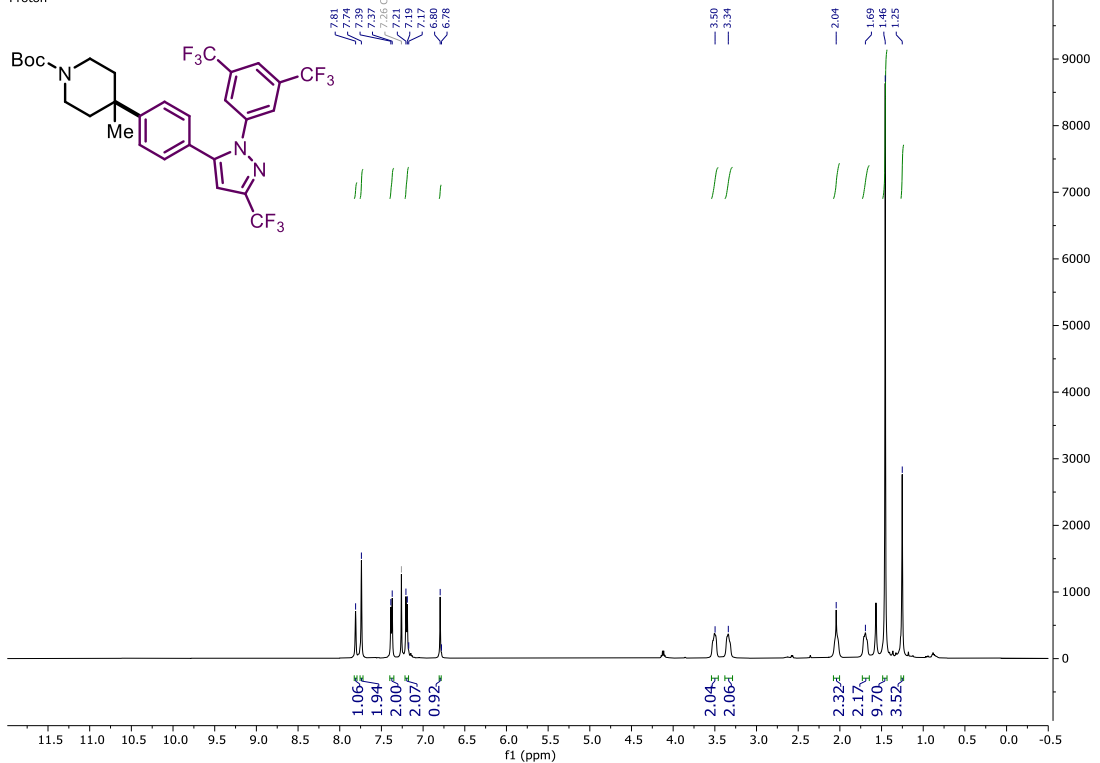

JRD-II-139-3-ac.2.fid  
Carbon 13

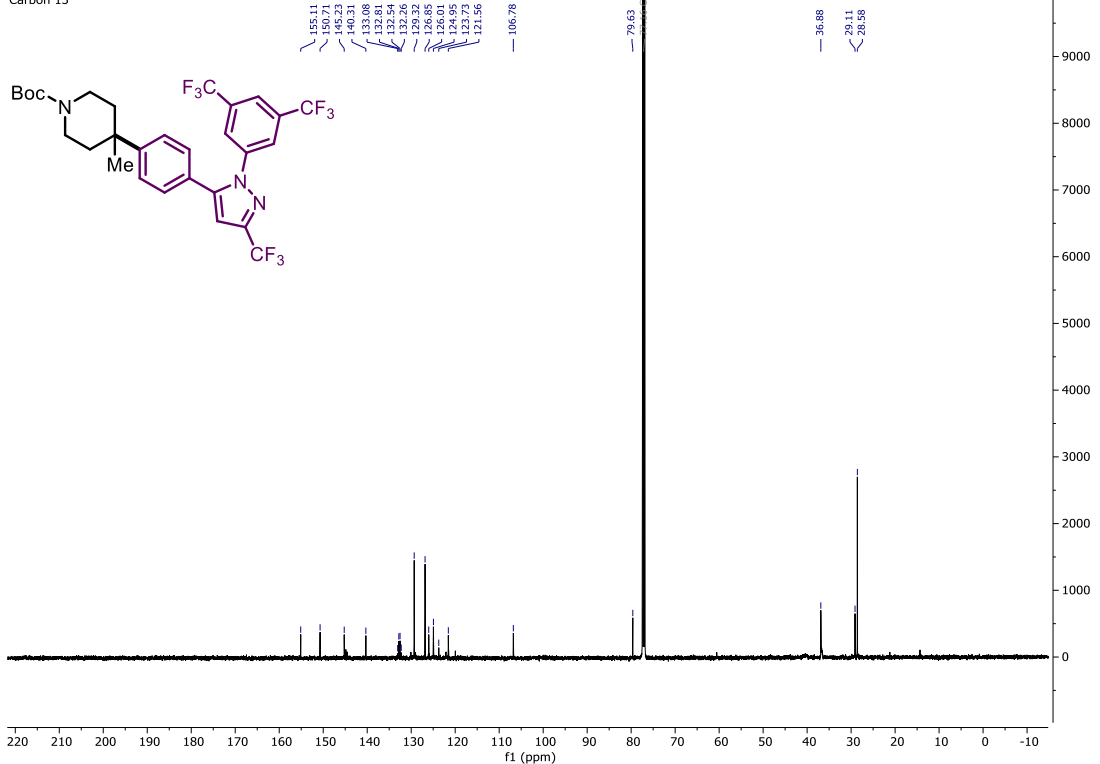

JRD-II-139-3-ac.3.fid  
19F

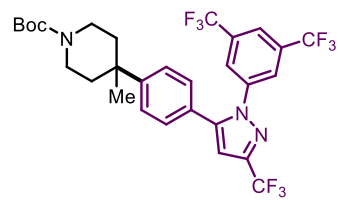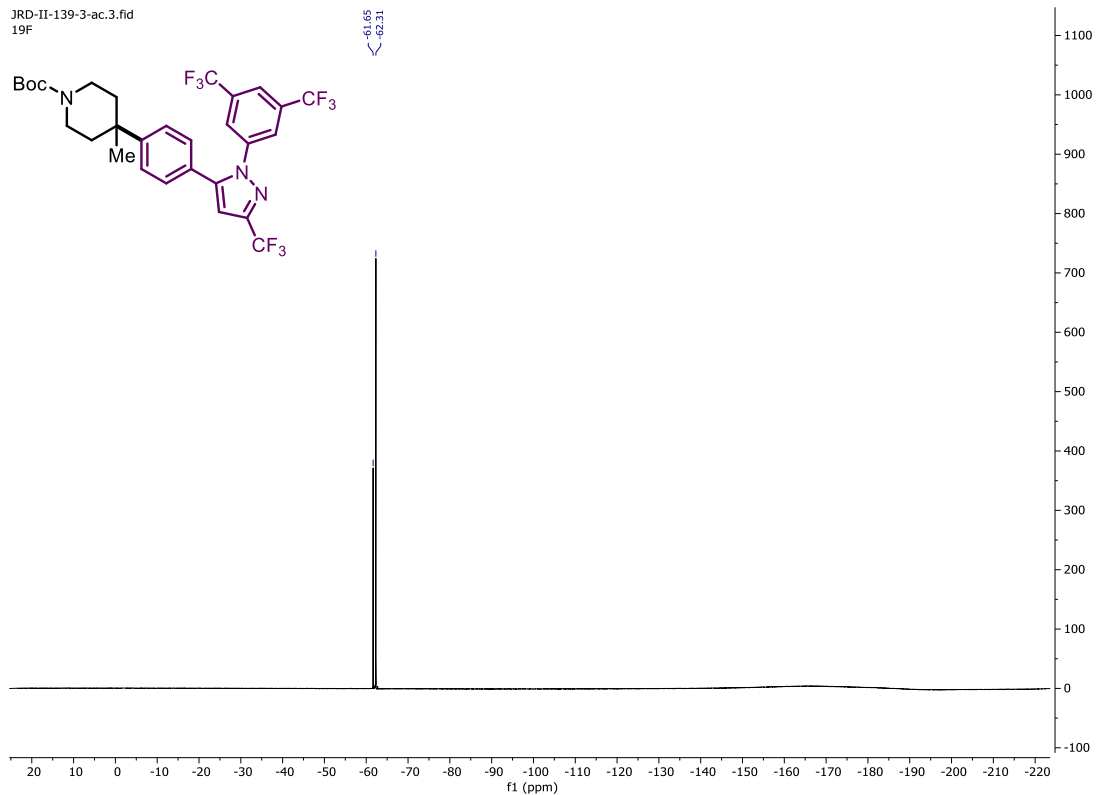

JRD-II-38-1-ac.3.fid

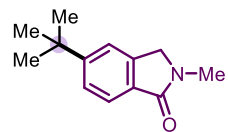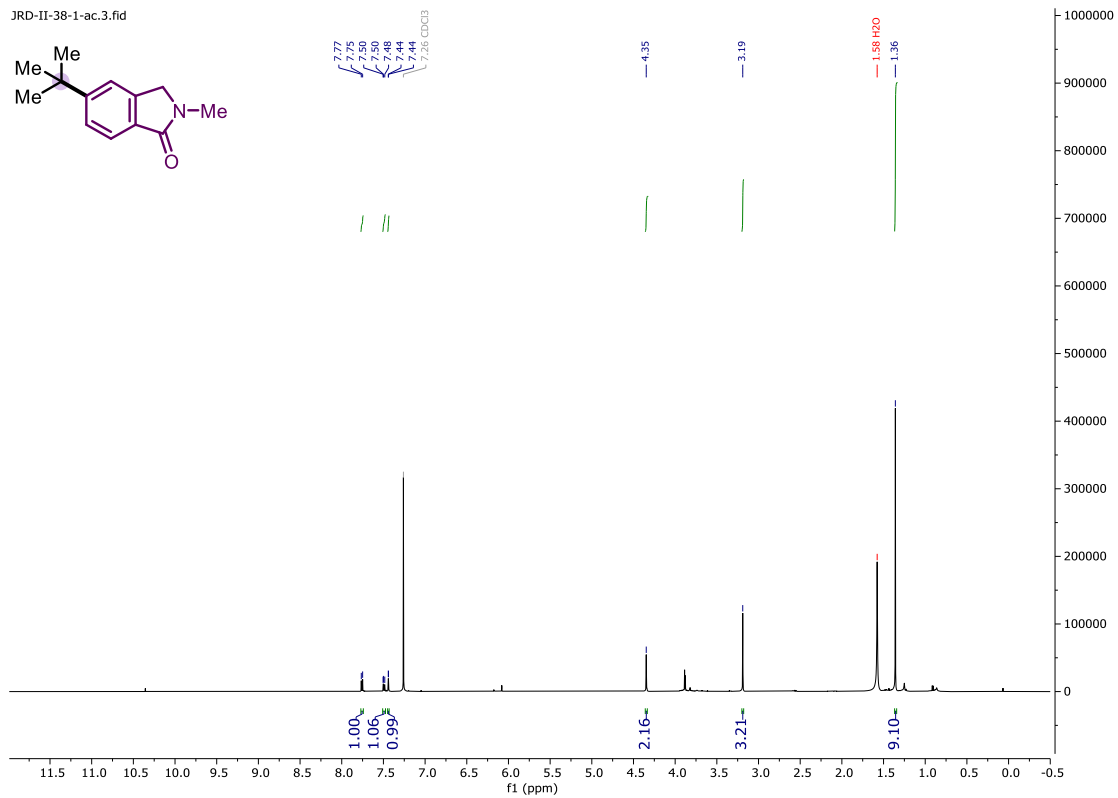

JRD-II-38-1-ac.4.fid  
Carbon 13

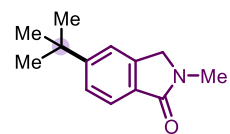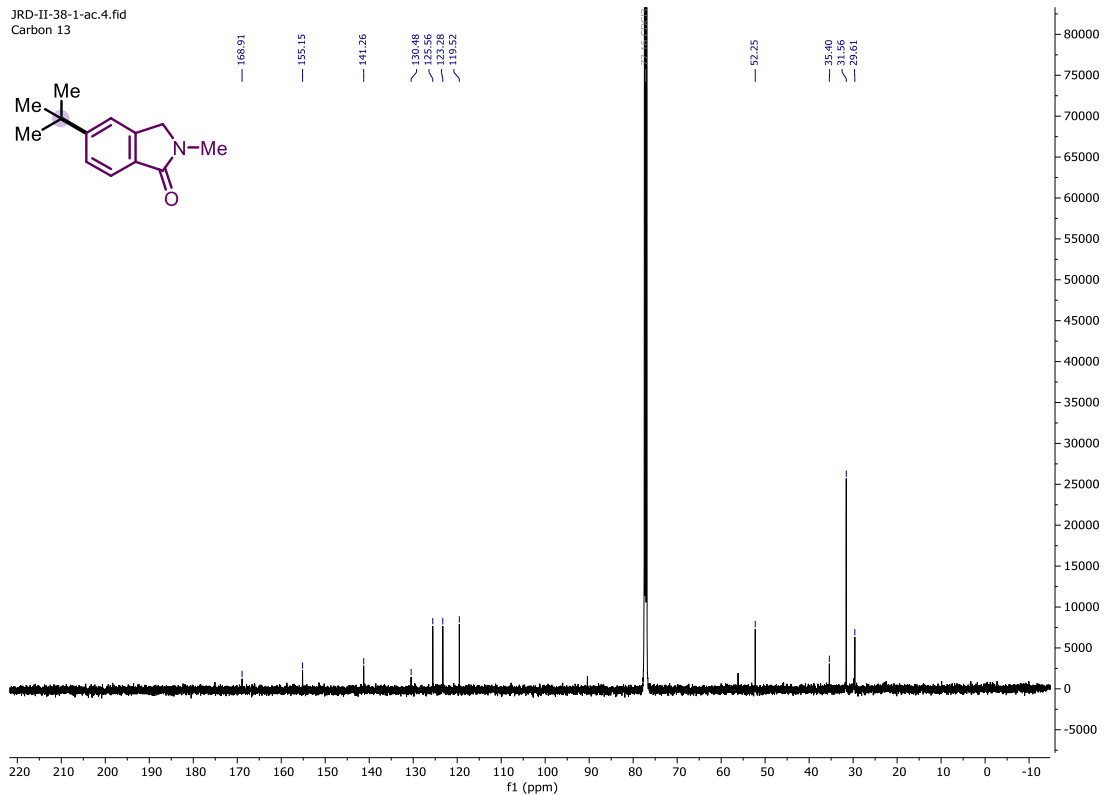

JRD-II-28-4-ac.2.fid  
Proton

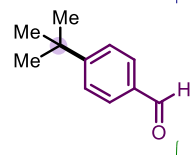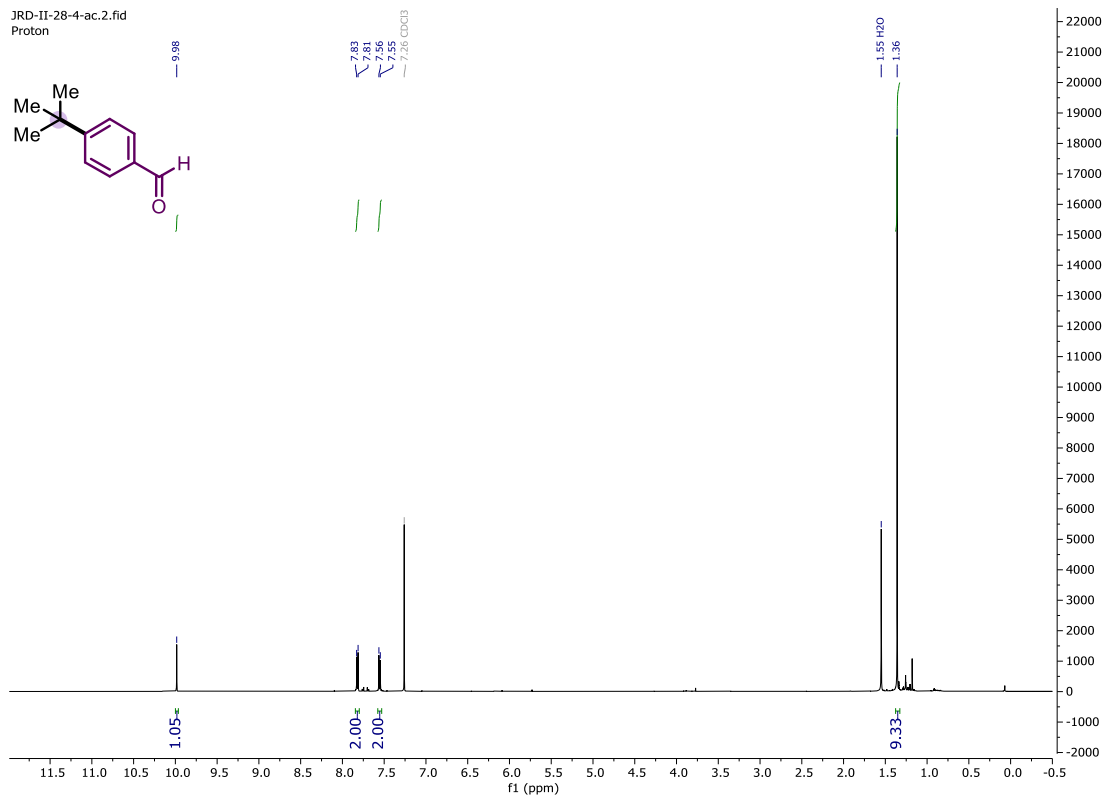

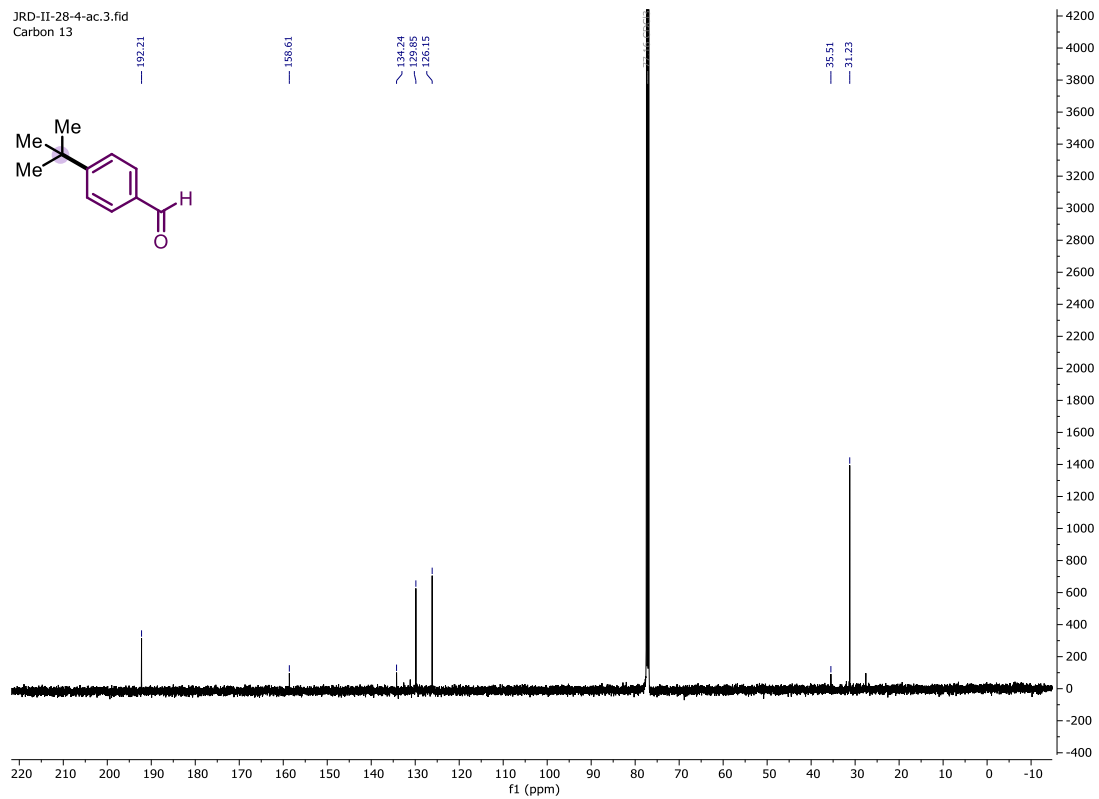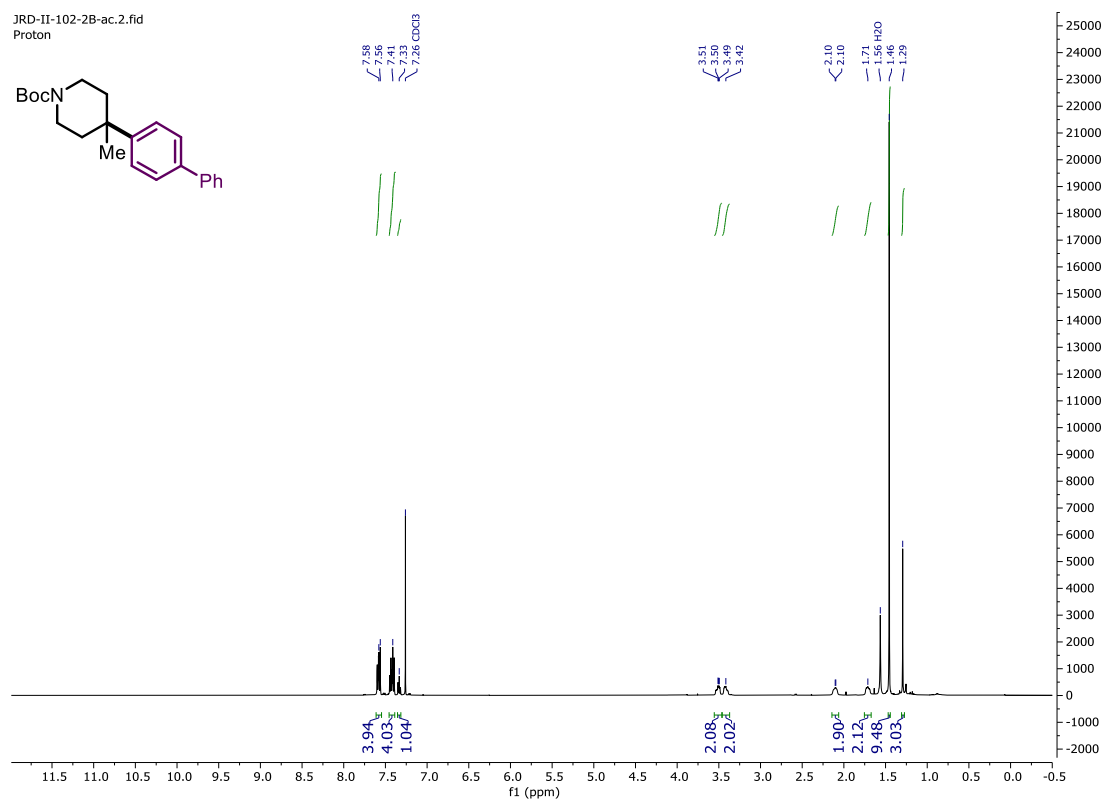

JRD-II-102-2B-ac.3.fid  
Carbon 13

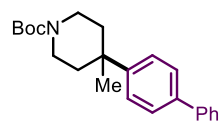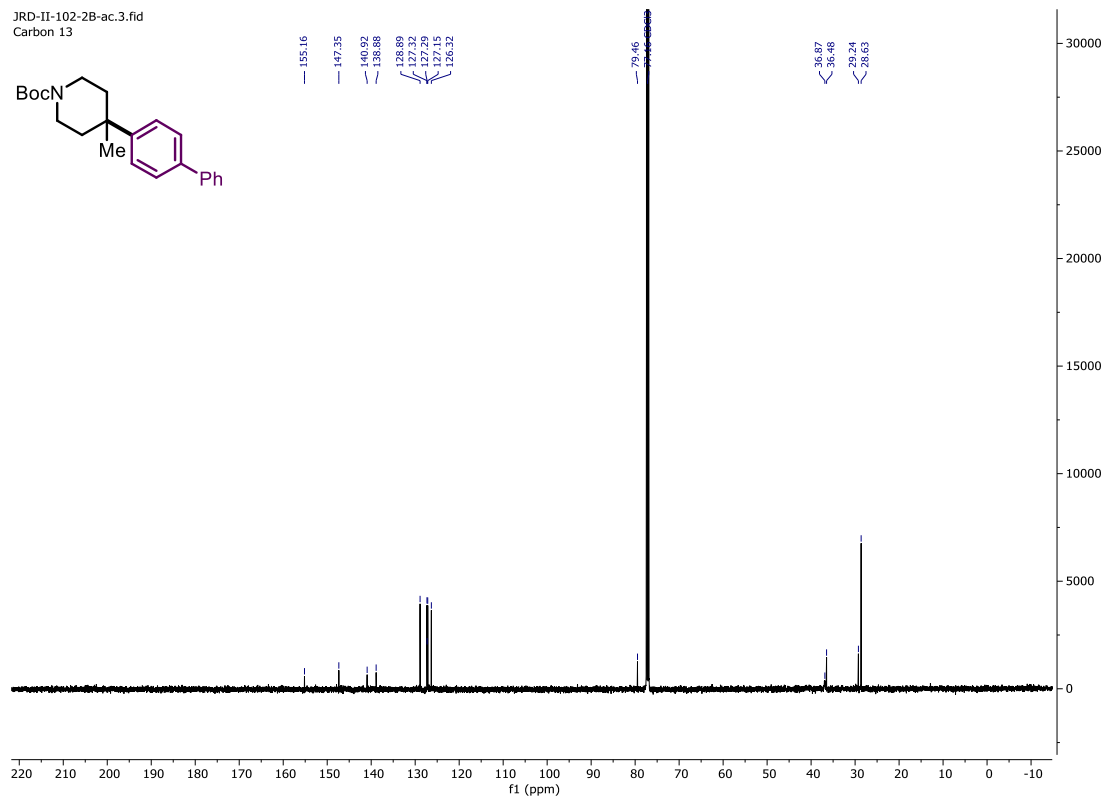

JRD-II-93-3-ac.1.fid  
Proton

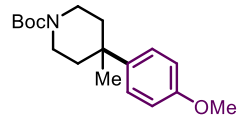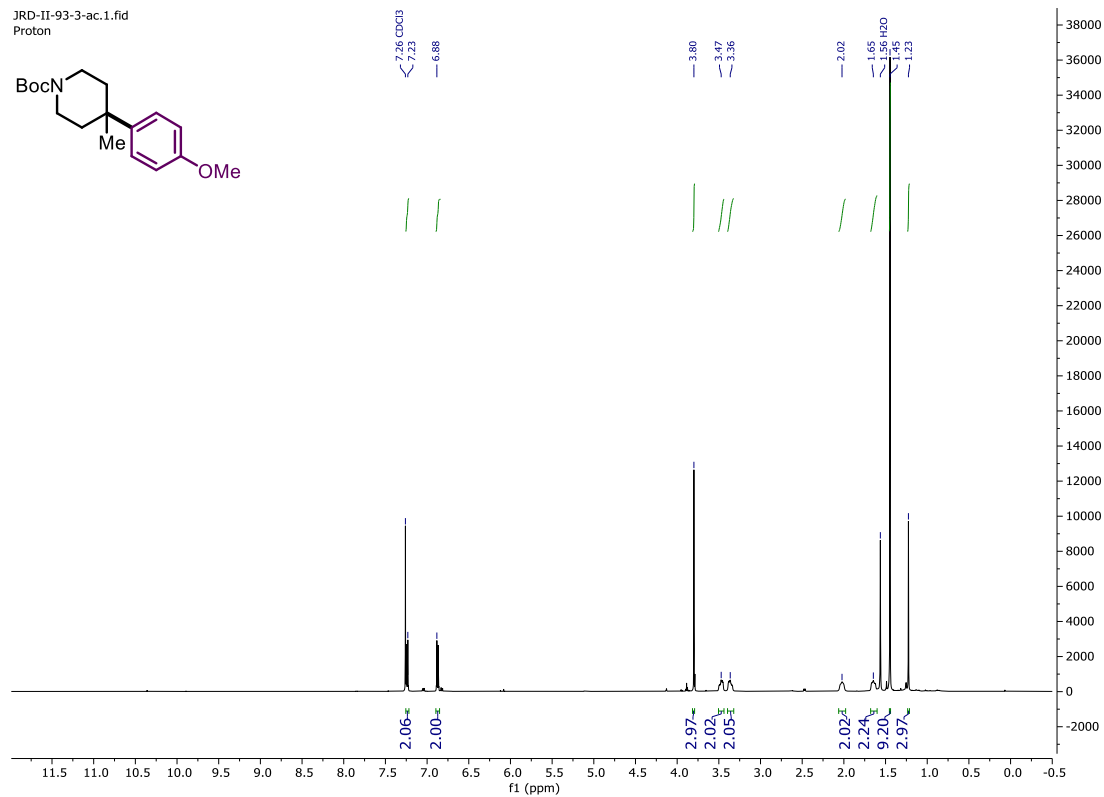

JRD-II-93-3-ac.2.fid  
Carbon 13

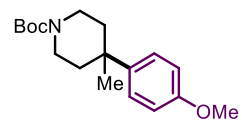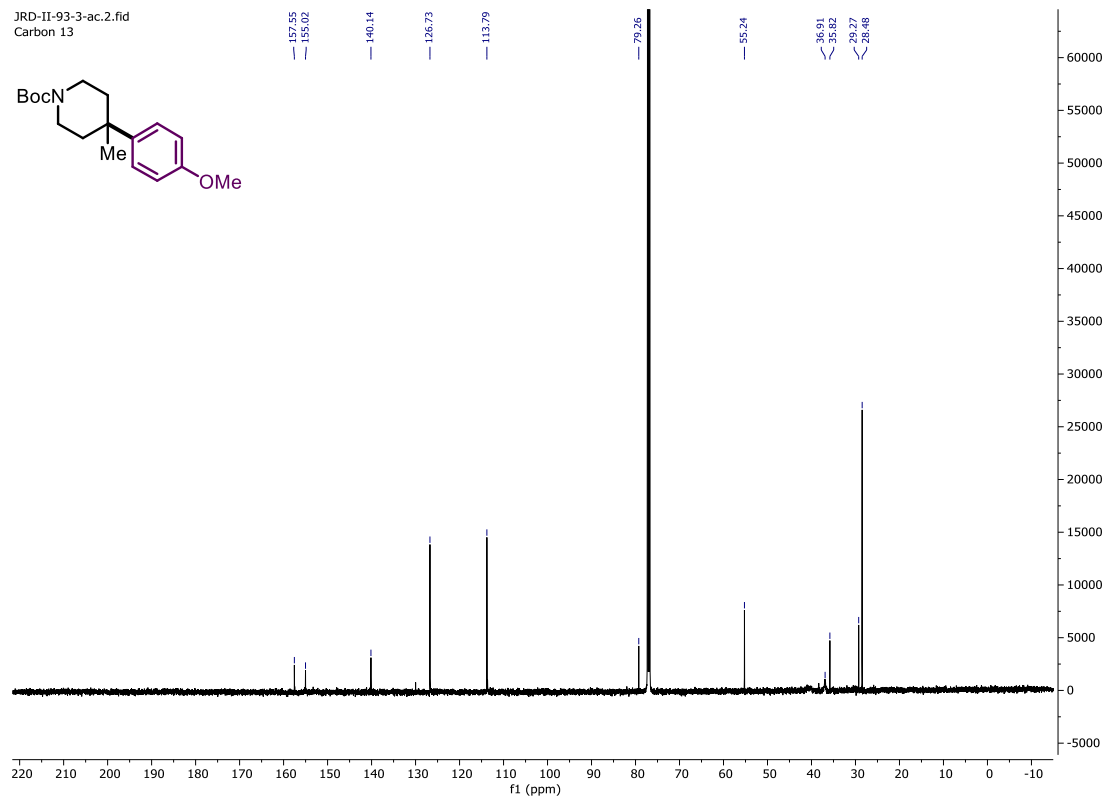

JRD-II-226-5-ac.3.fid  
Proton

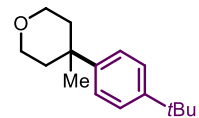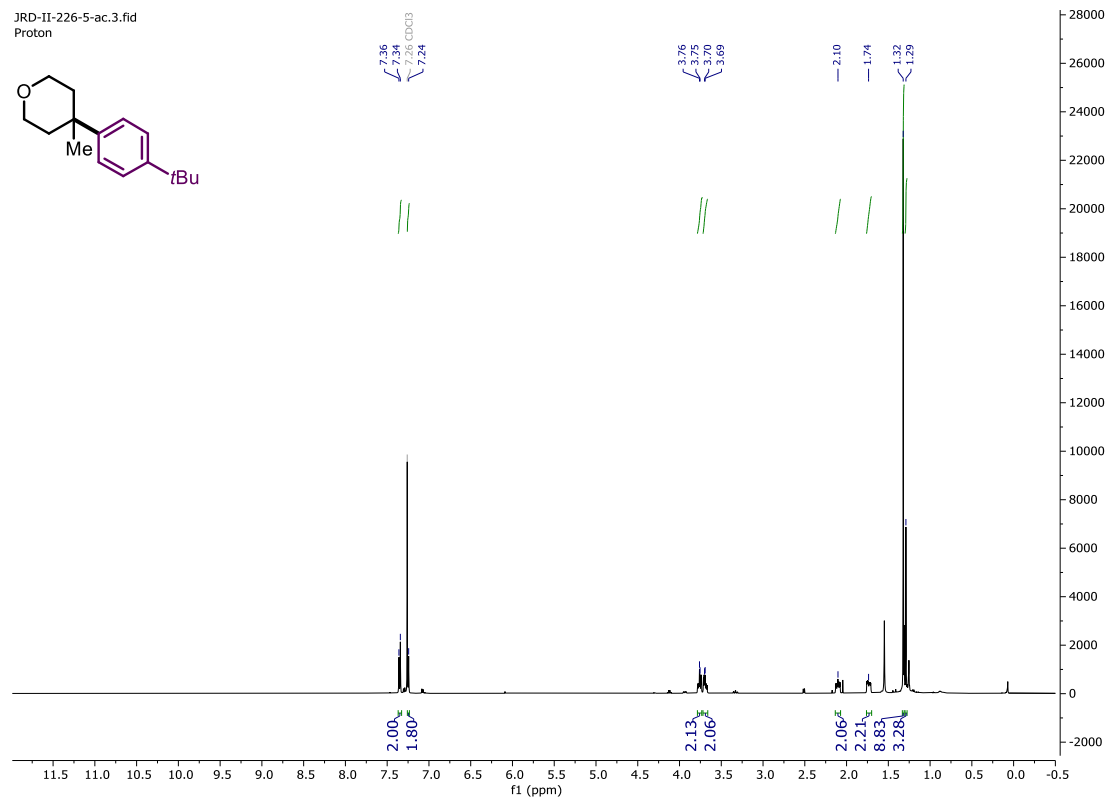

JRD-II-226-5-ac.4.fid  
Carbon 13

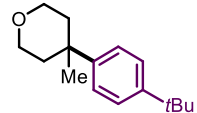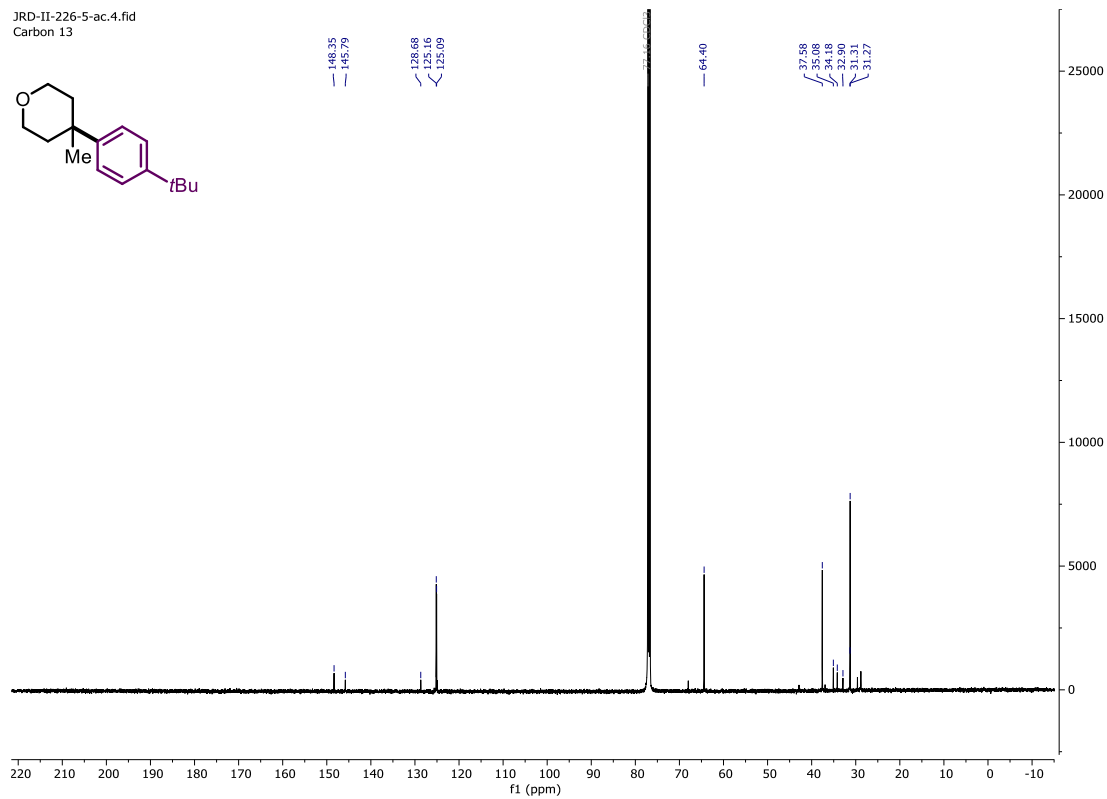

JRD-II-19-2-ac.1.fid  
proton

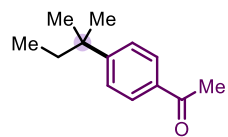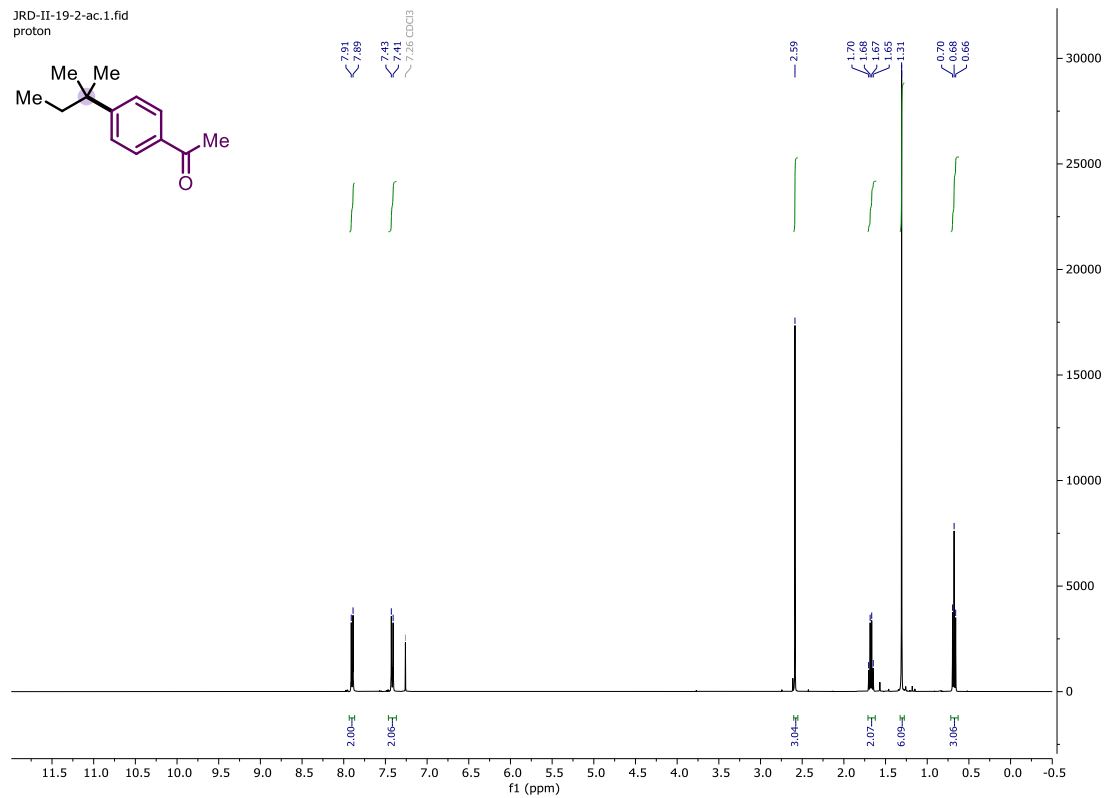

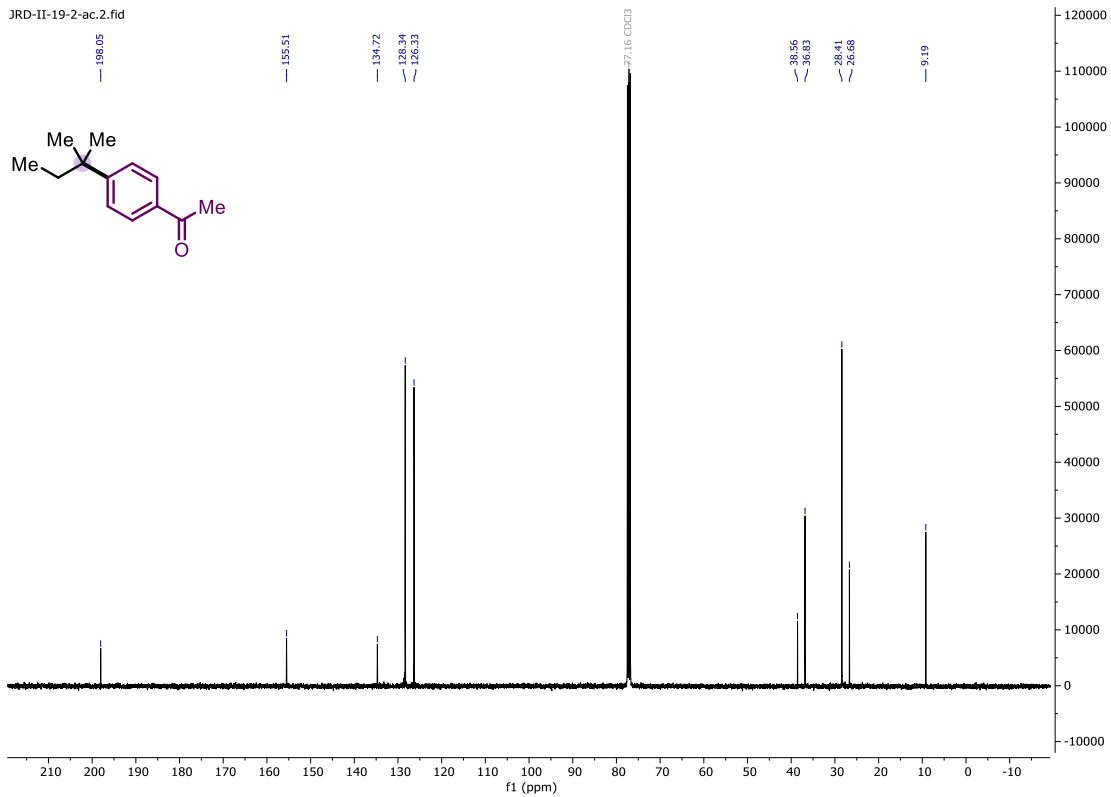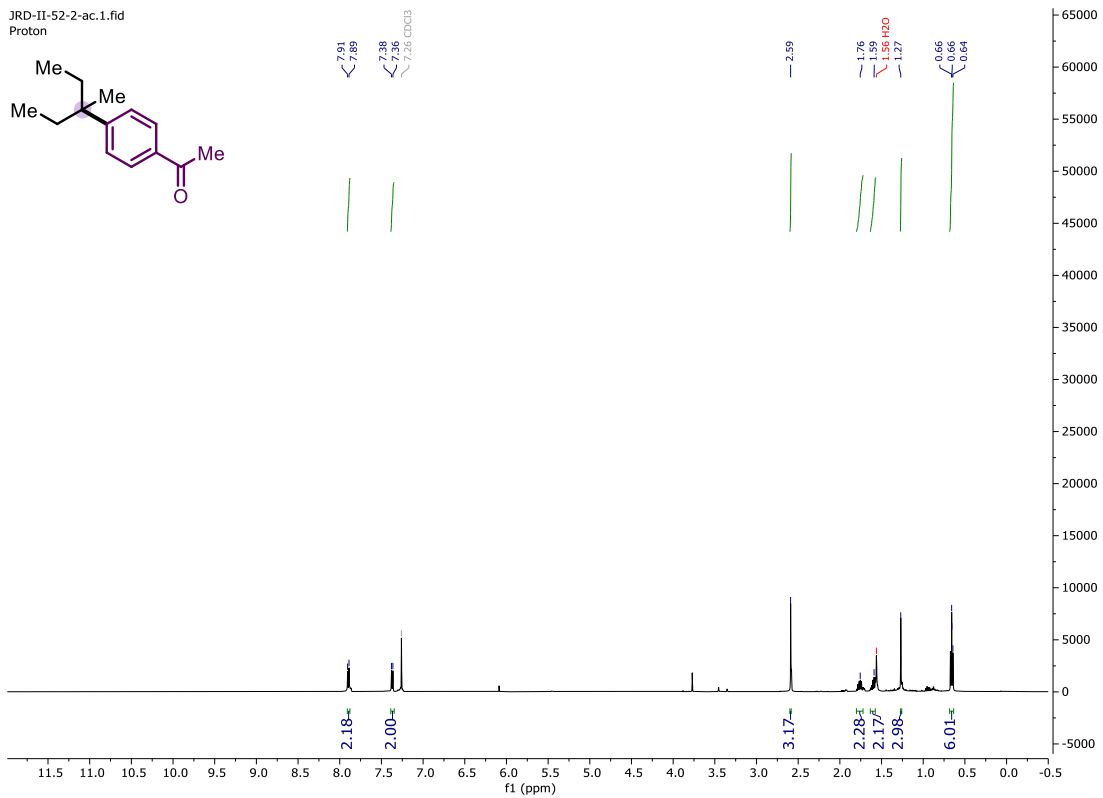



JRD-II-52-2-ac.2.fid  
Carbon 13

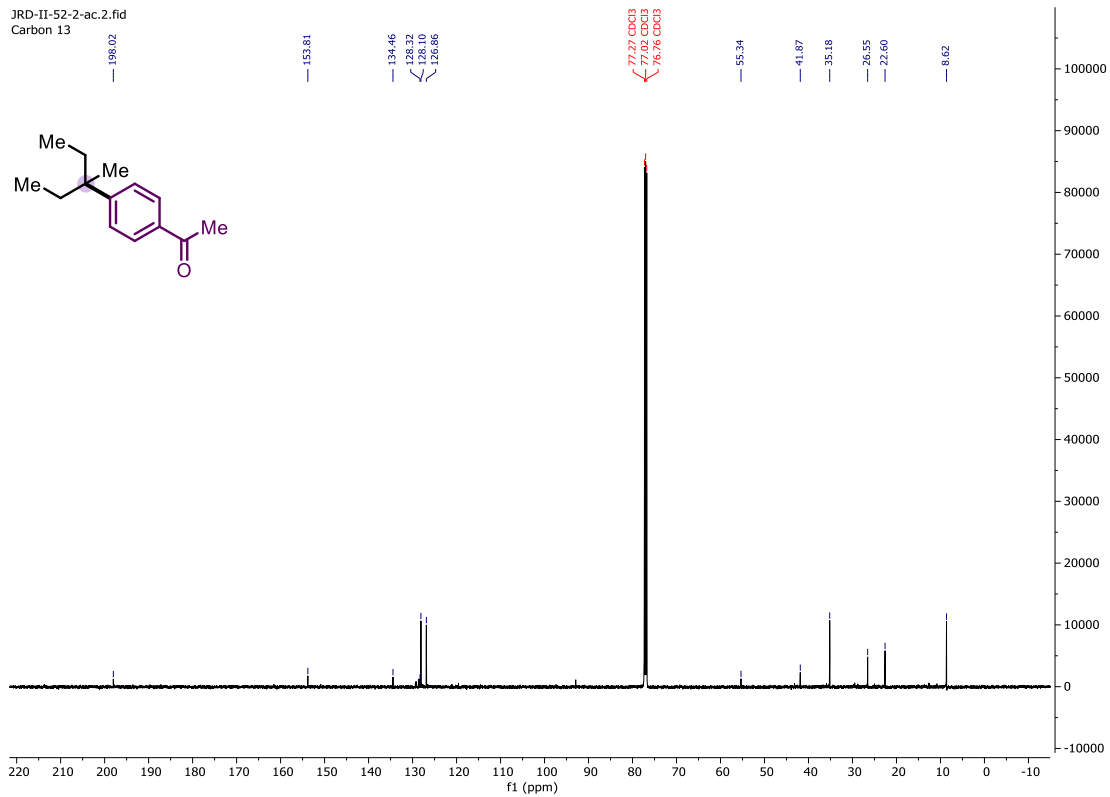

JRD-II-20-1-ac.1.fid  
proton

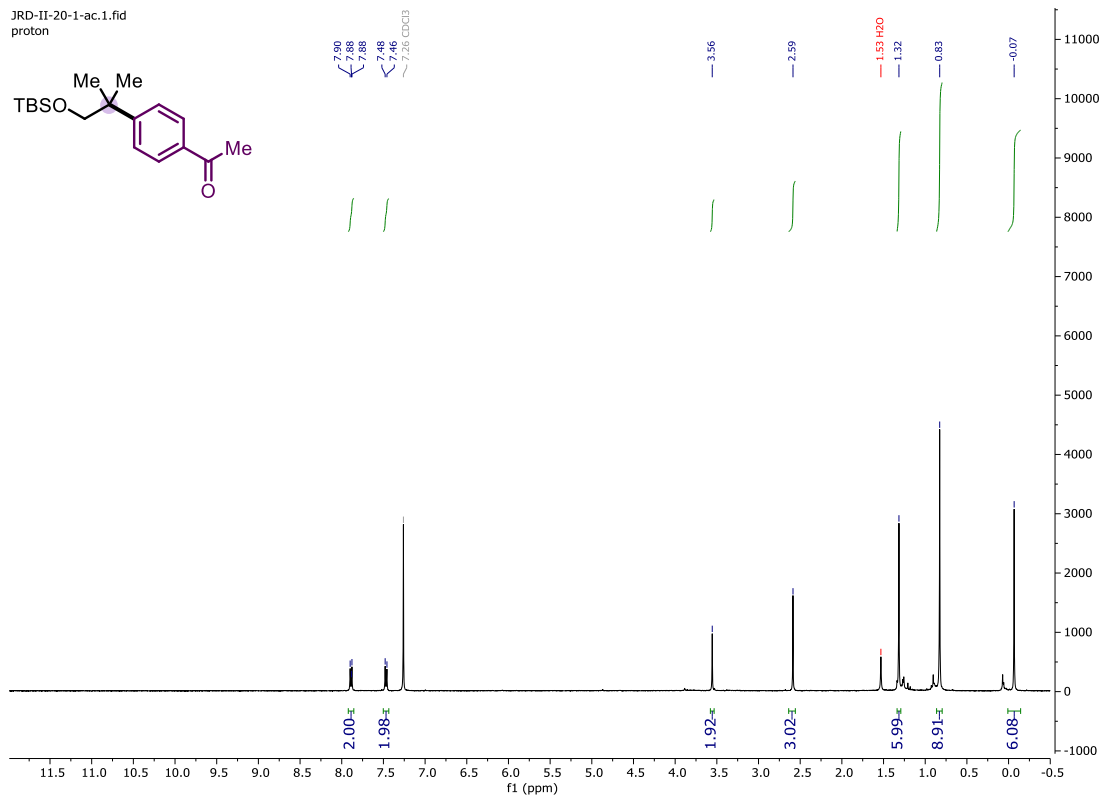

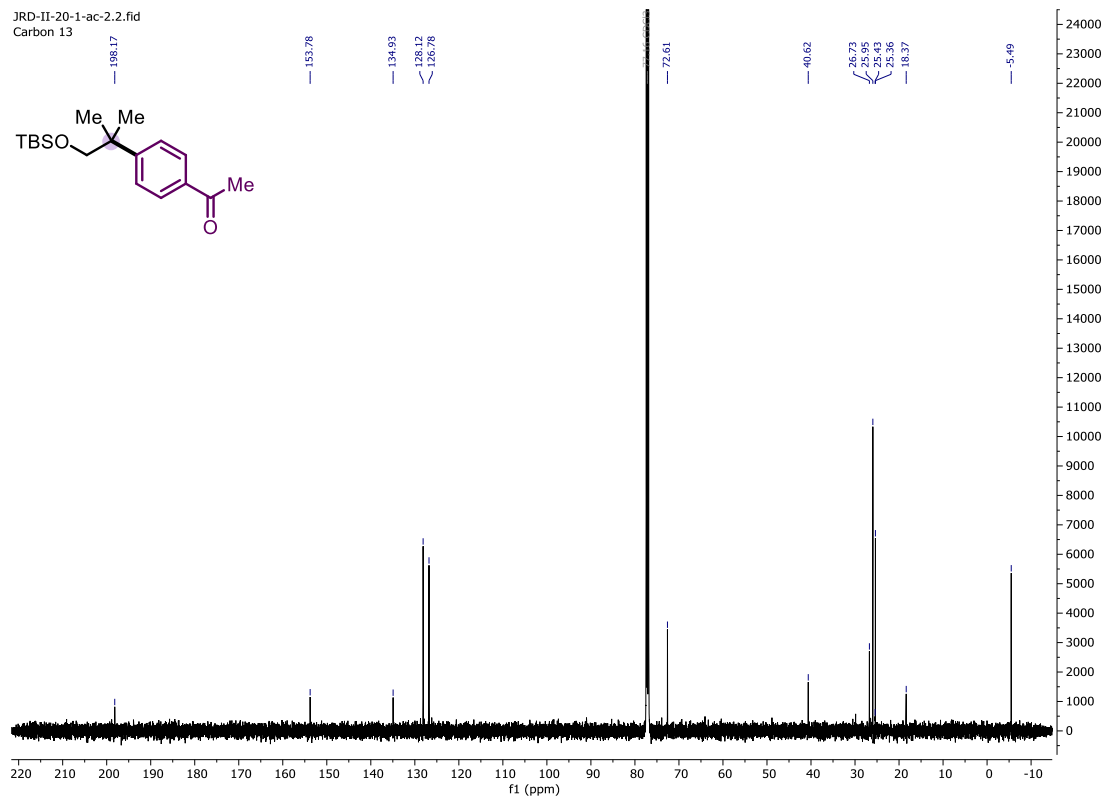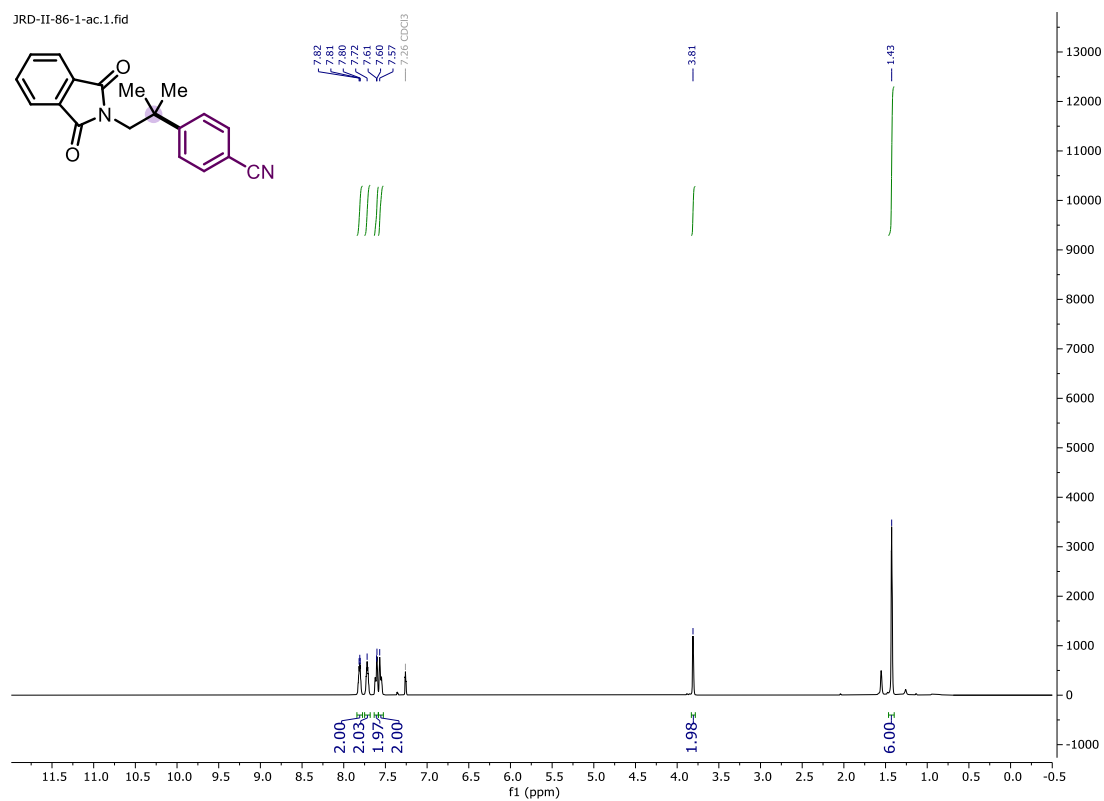

JRD-II-86-1-ac.2.fid

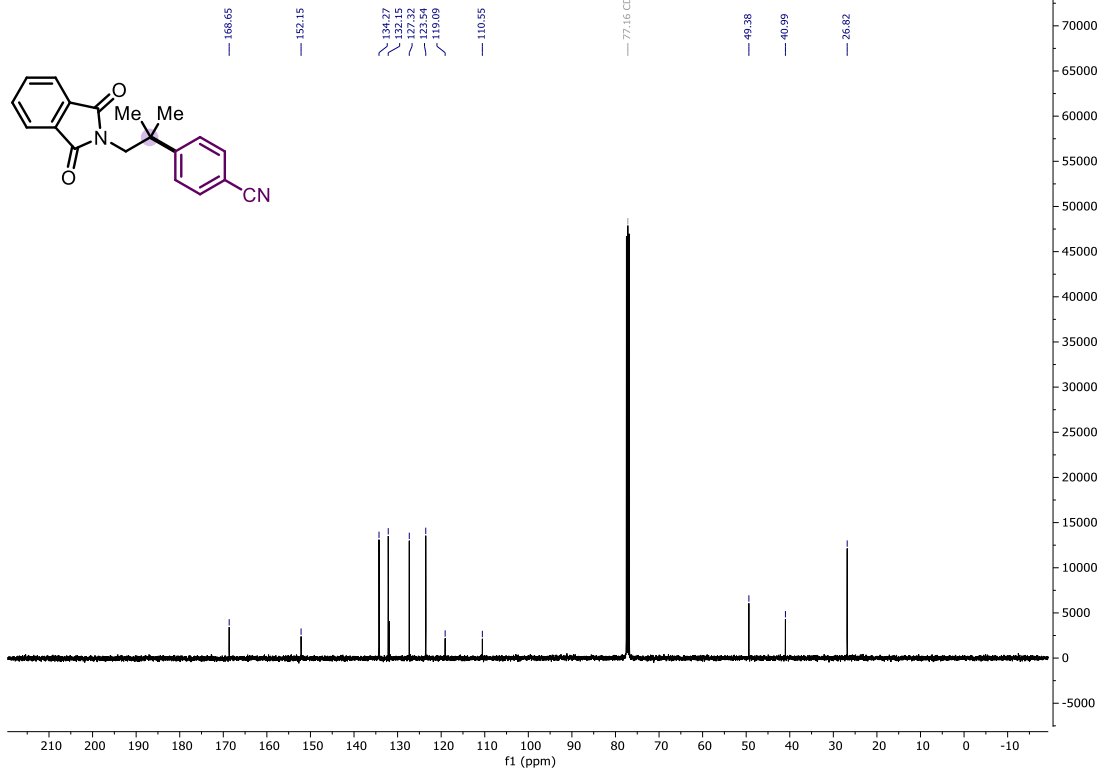

JRD-II-51-1-ac.2.fid  
proton

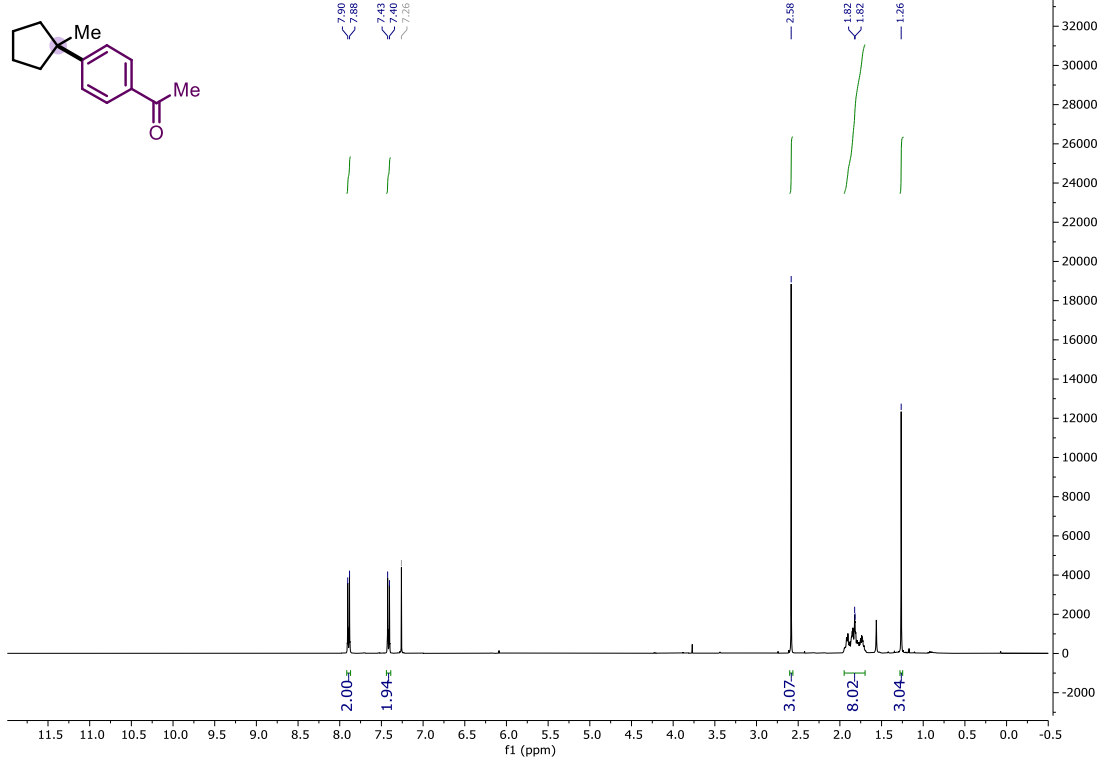

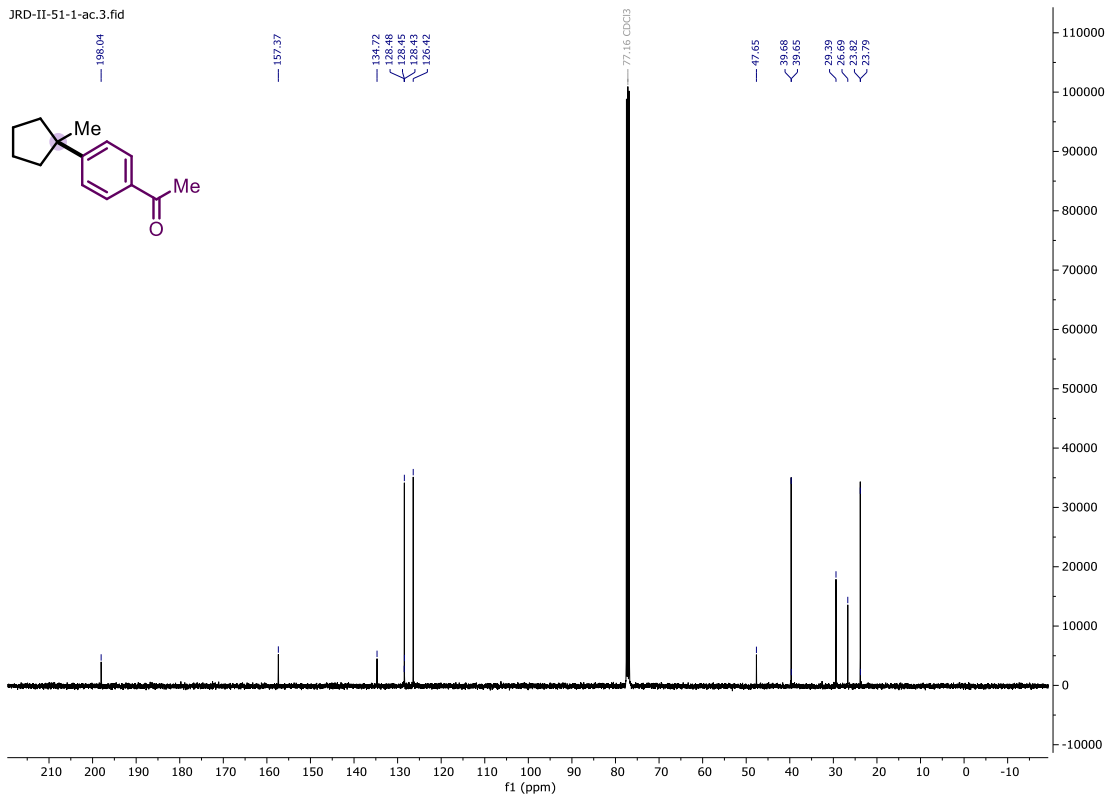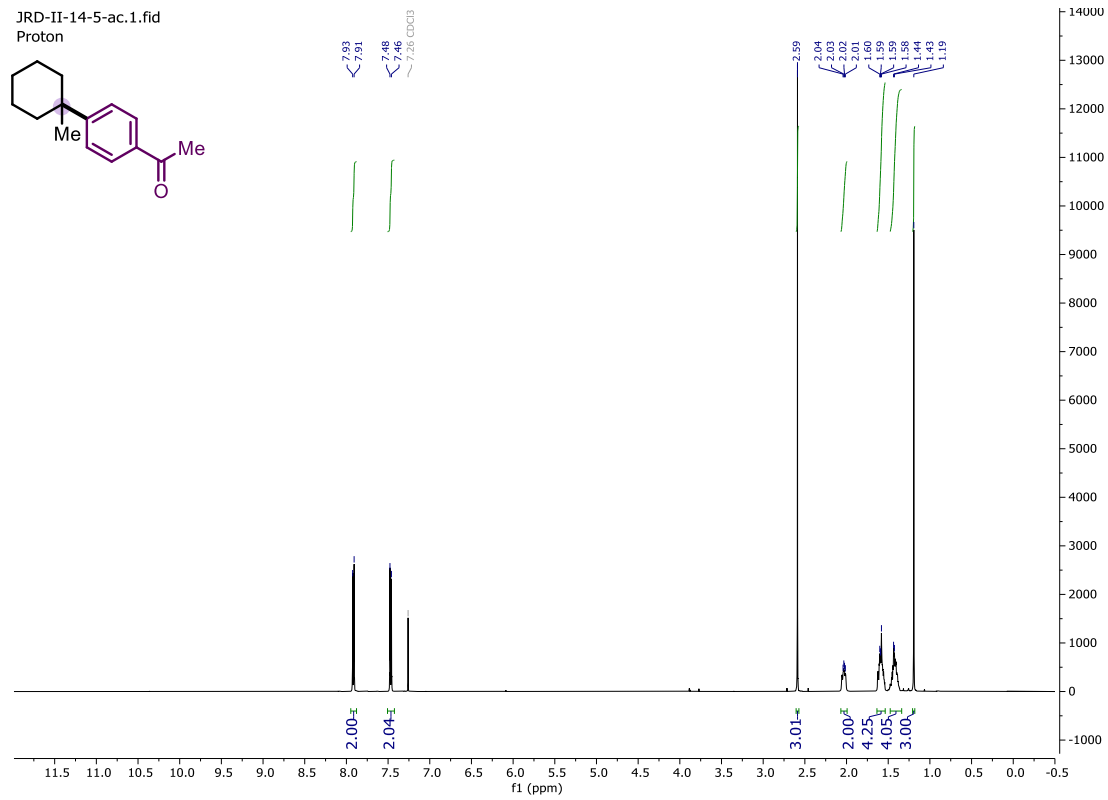

JRD-II-14-5-ac.2.fid  
Carbon 13

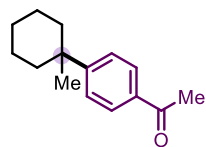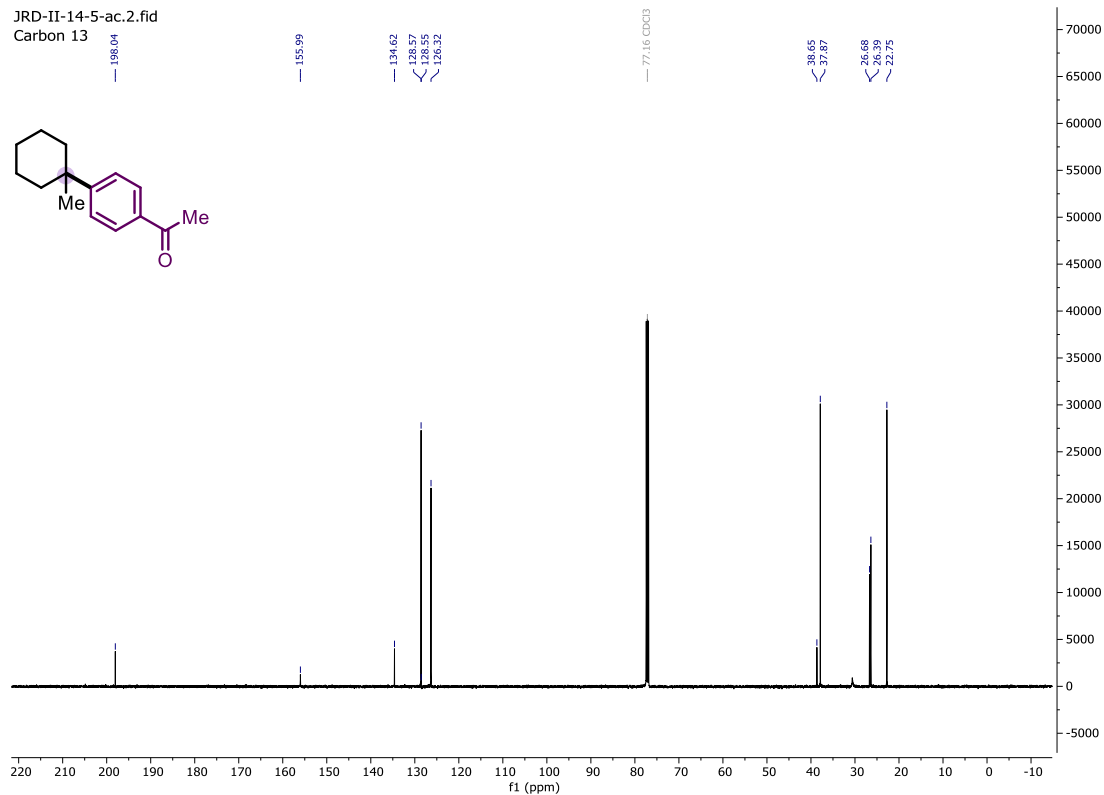

JRD-II-19-4-ac.1.fid  
Proton

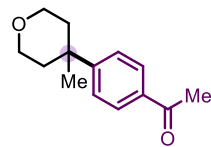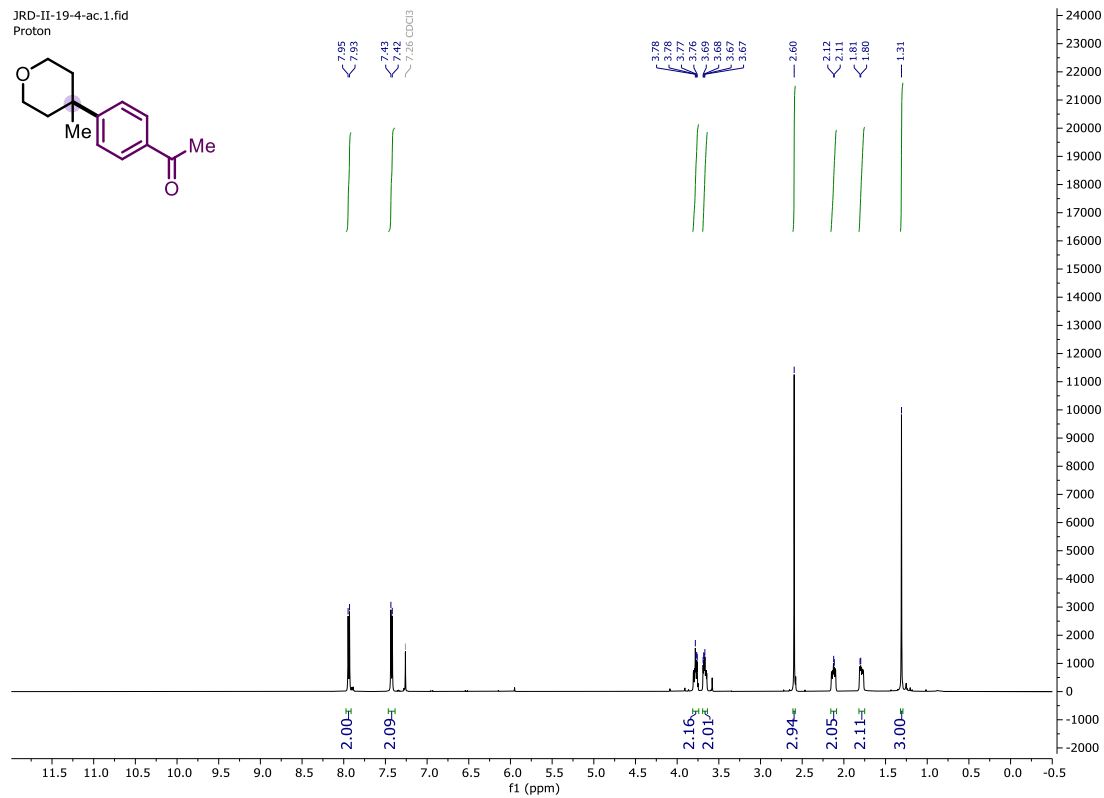

JRD-II-19-4-ac.2.fid  
Carbon 13

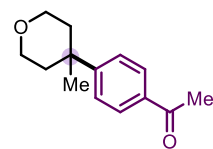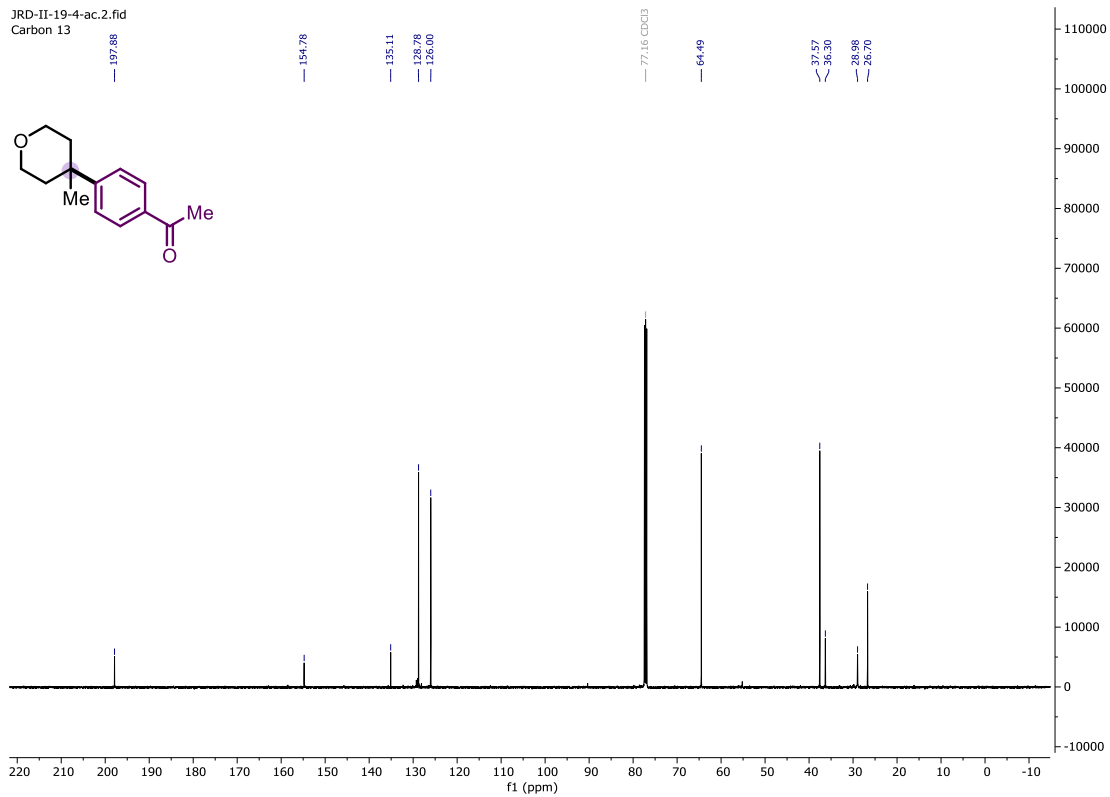

JRD-455-1-acP.1.fid  
Proton

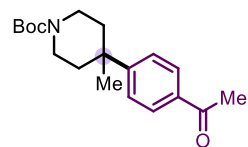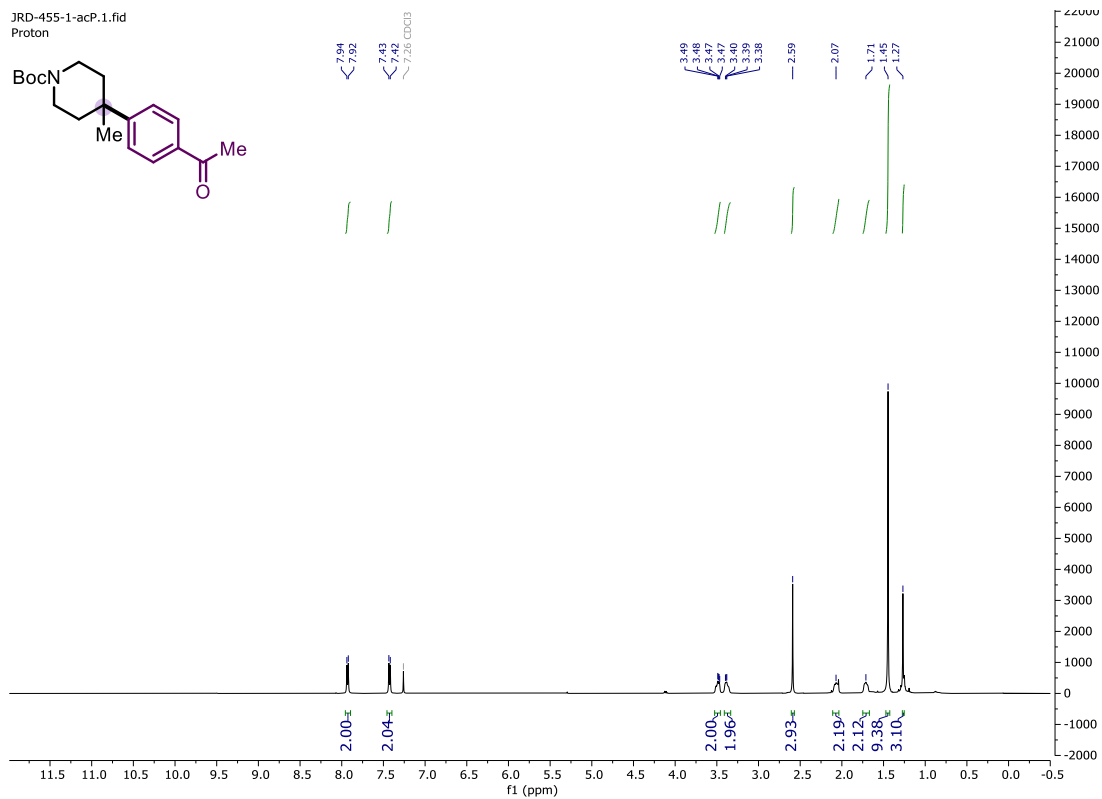

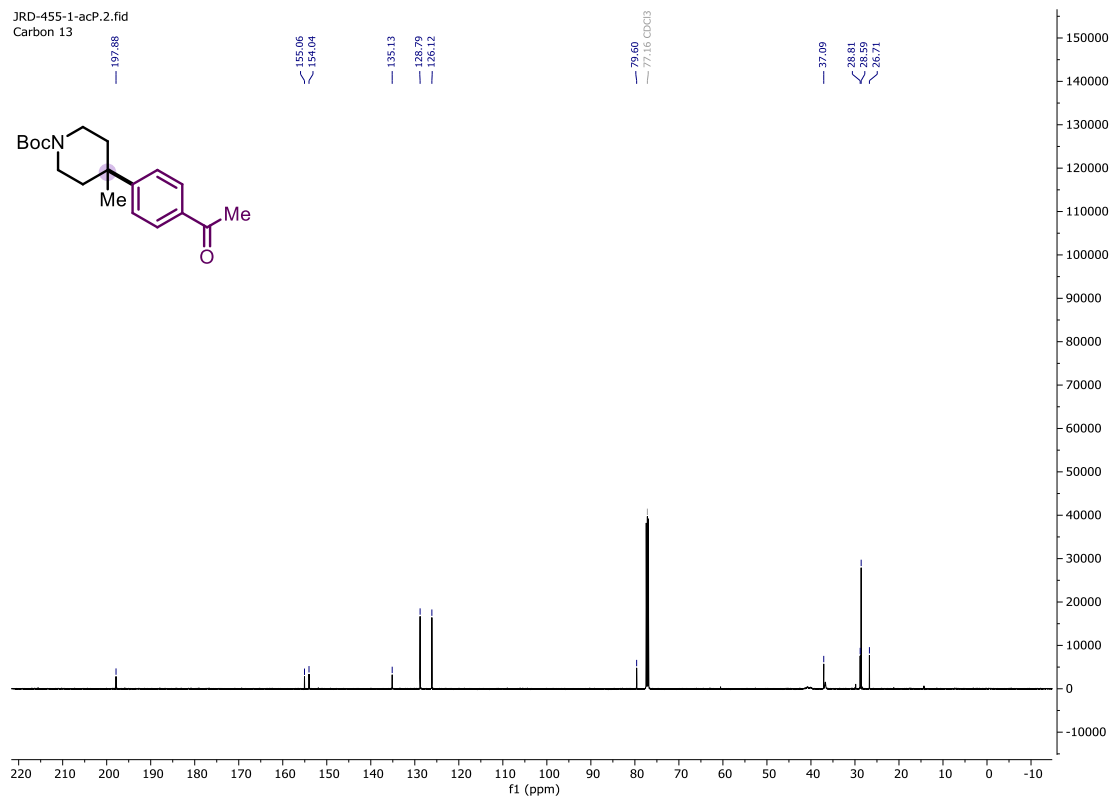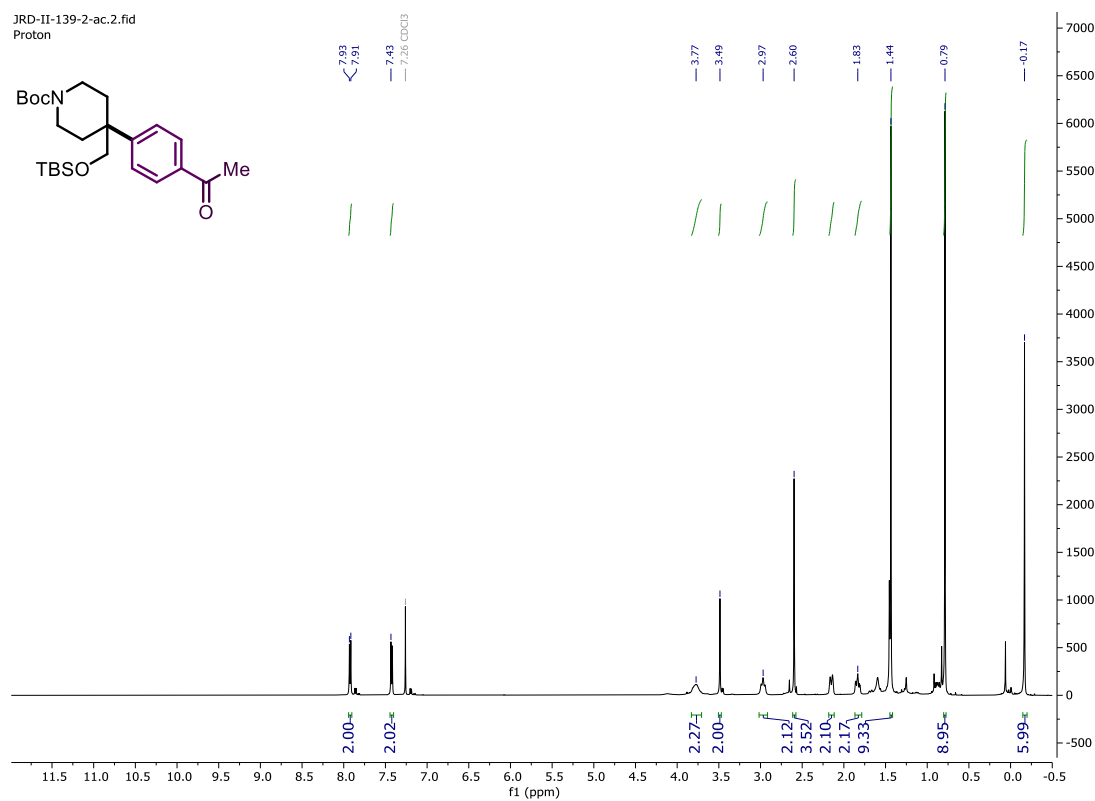

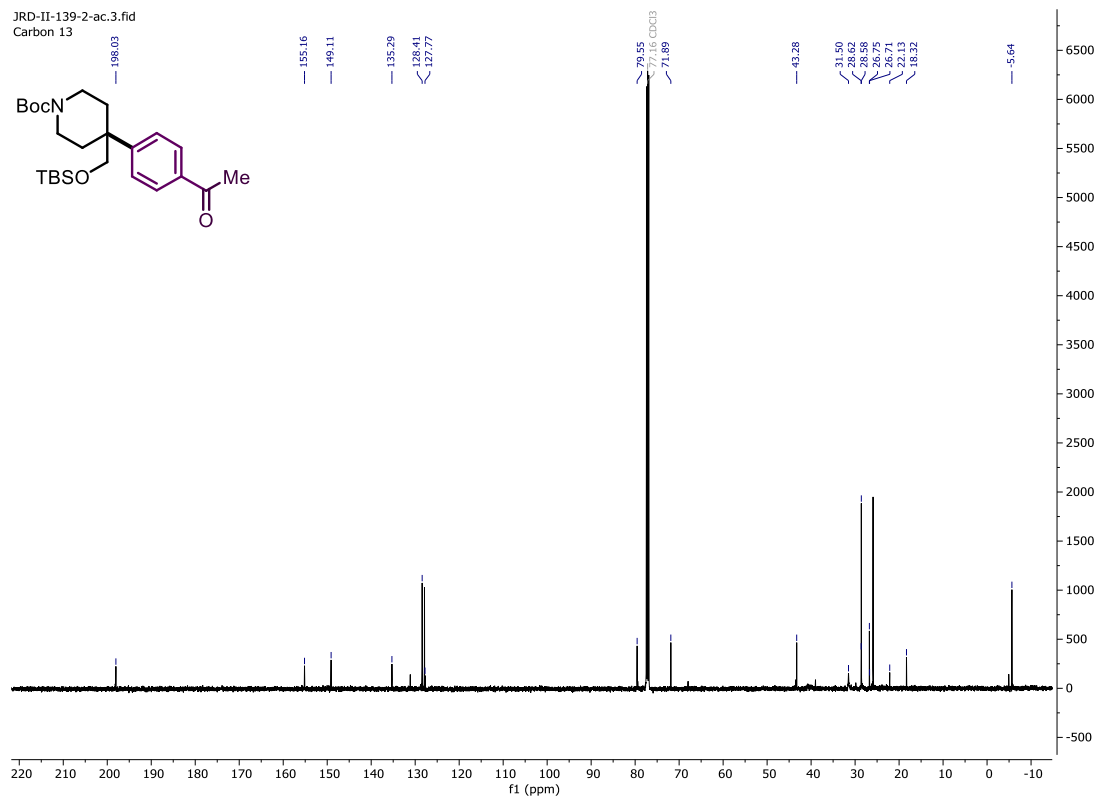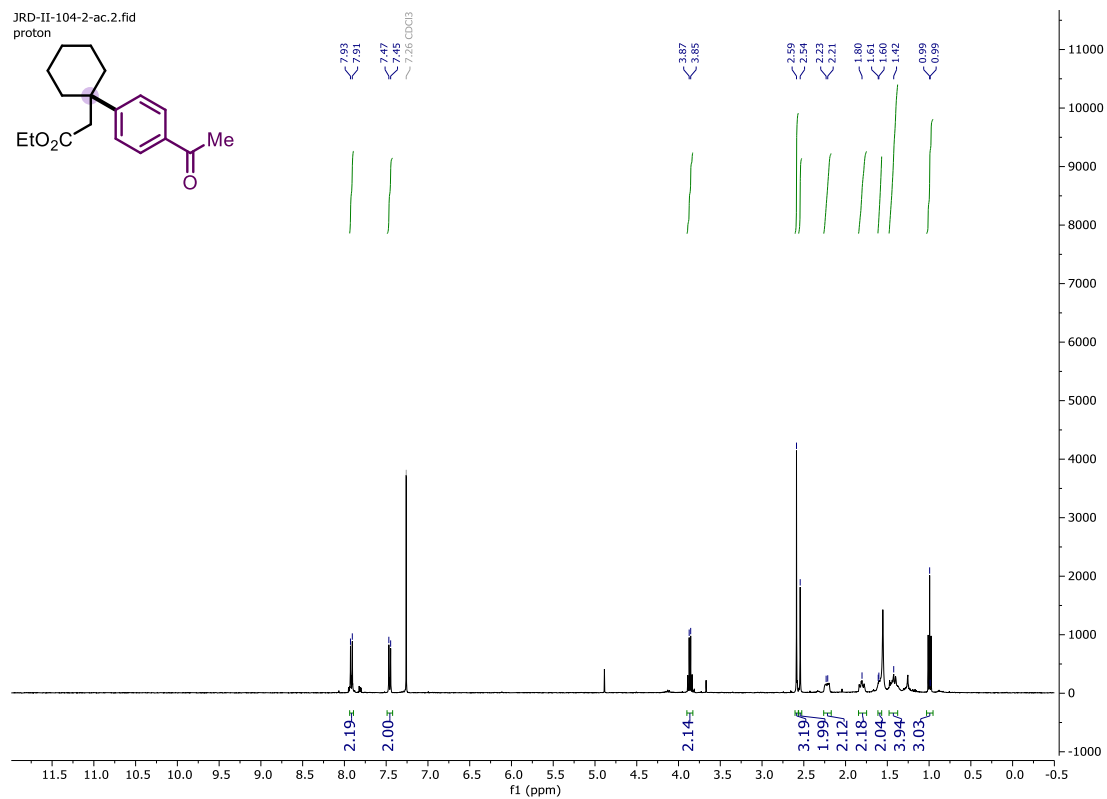



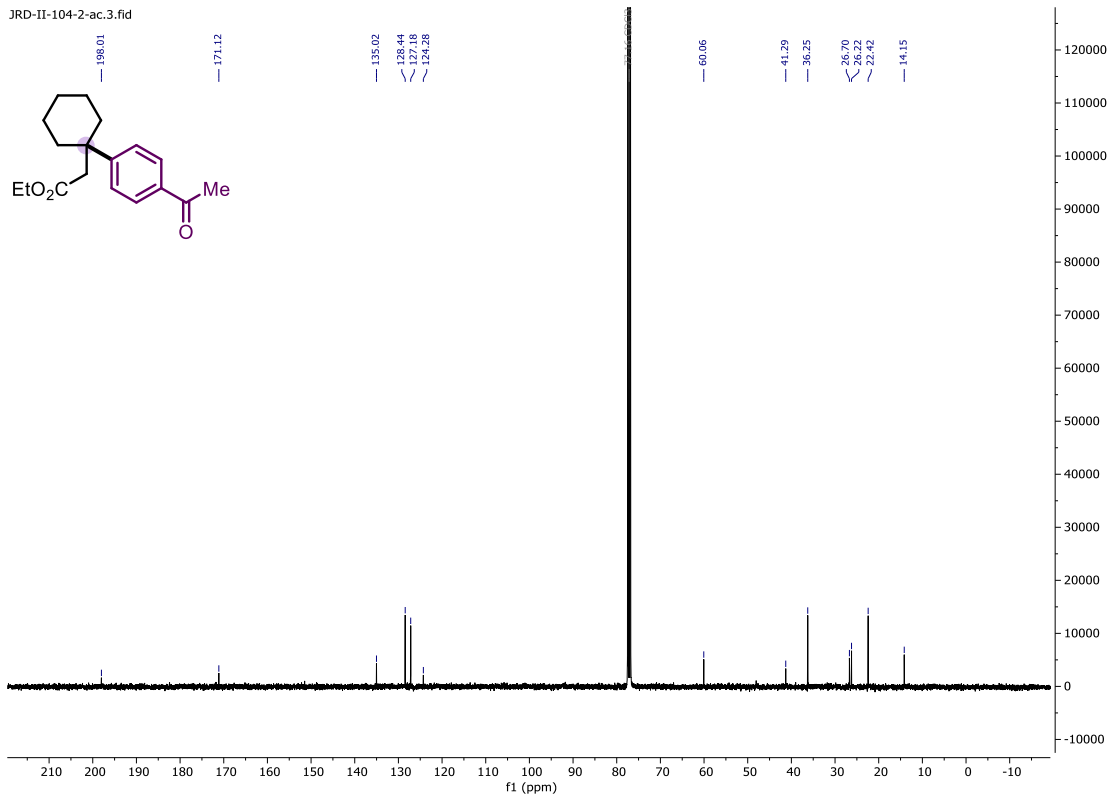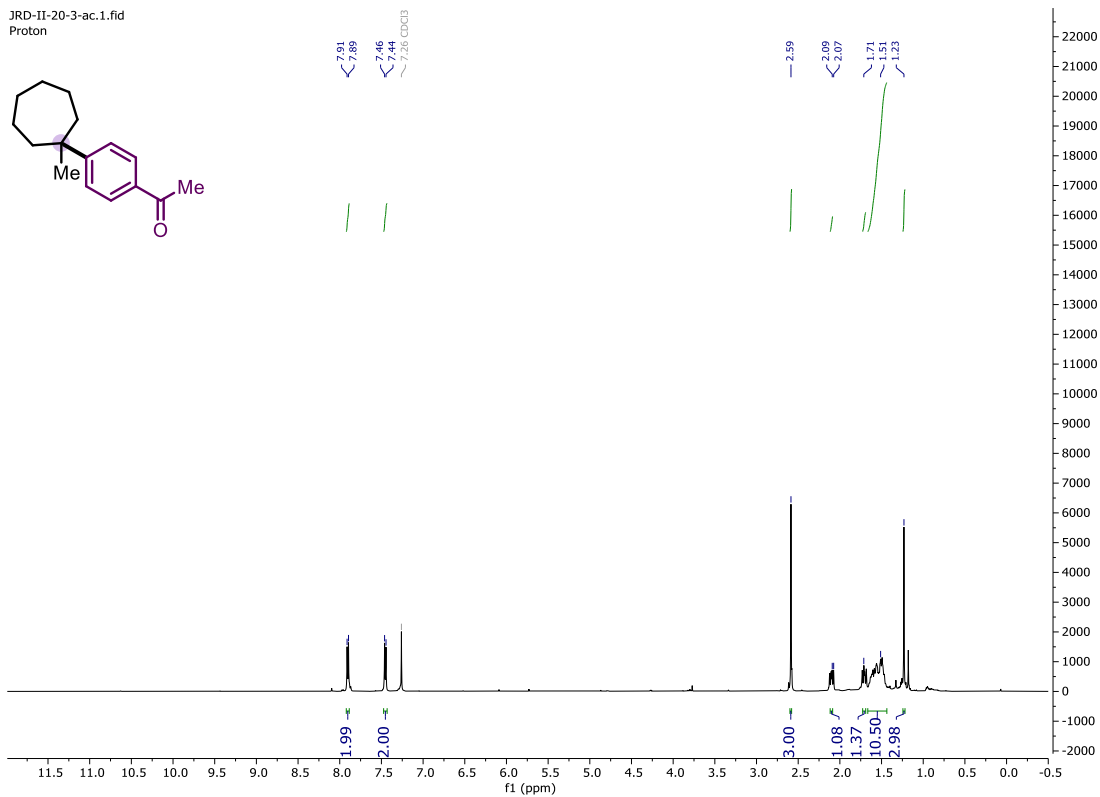

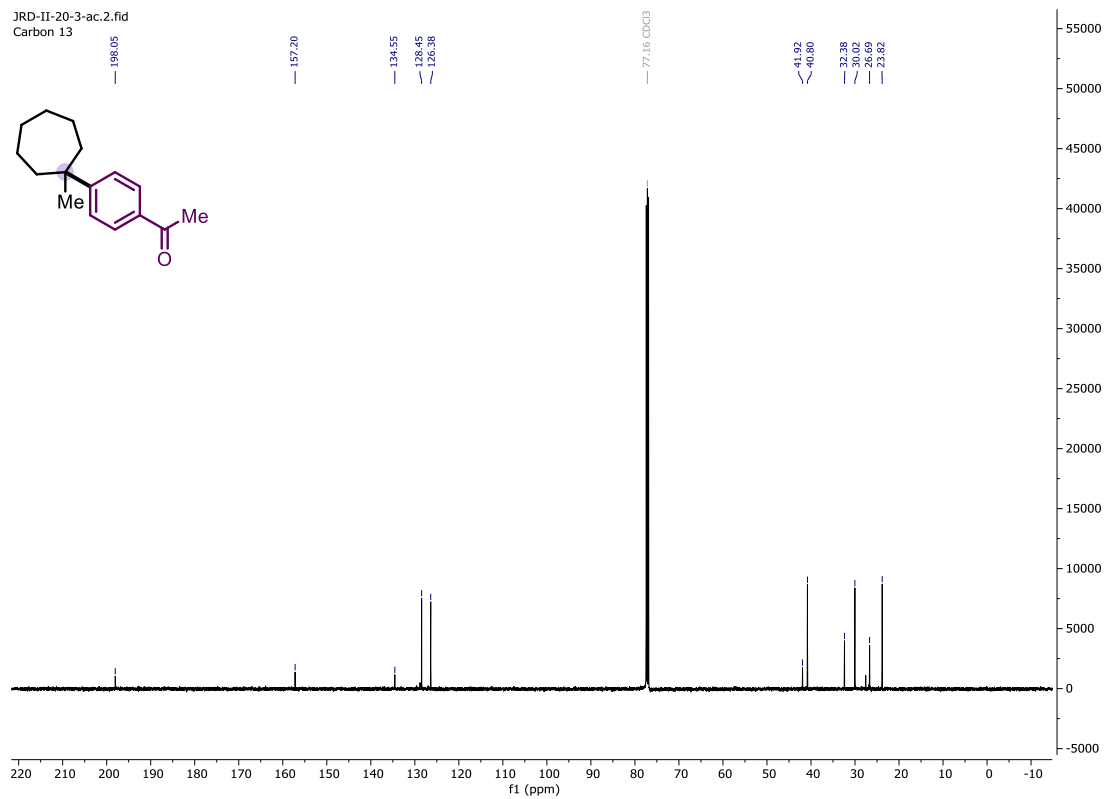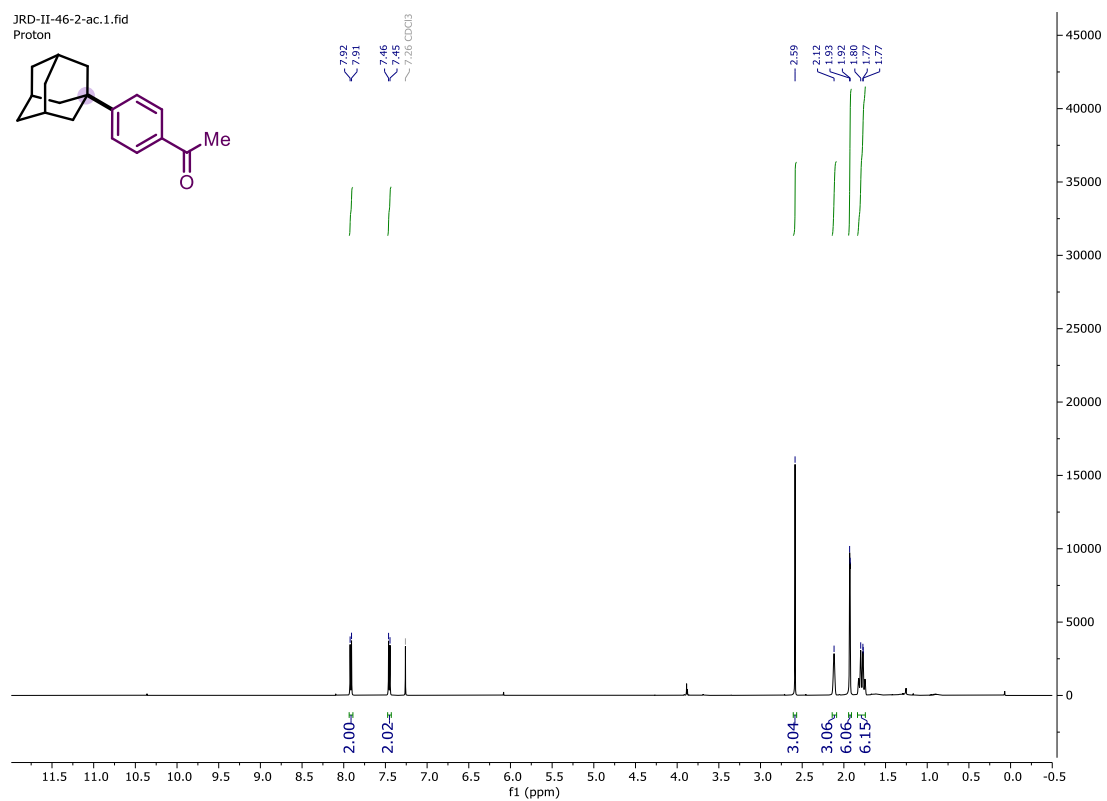

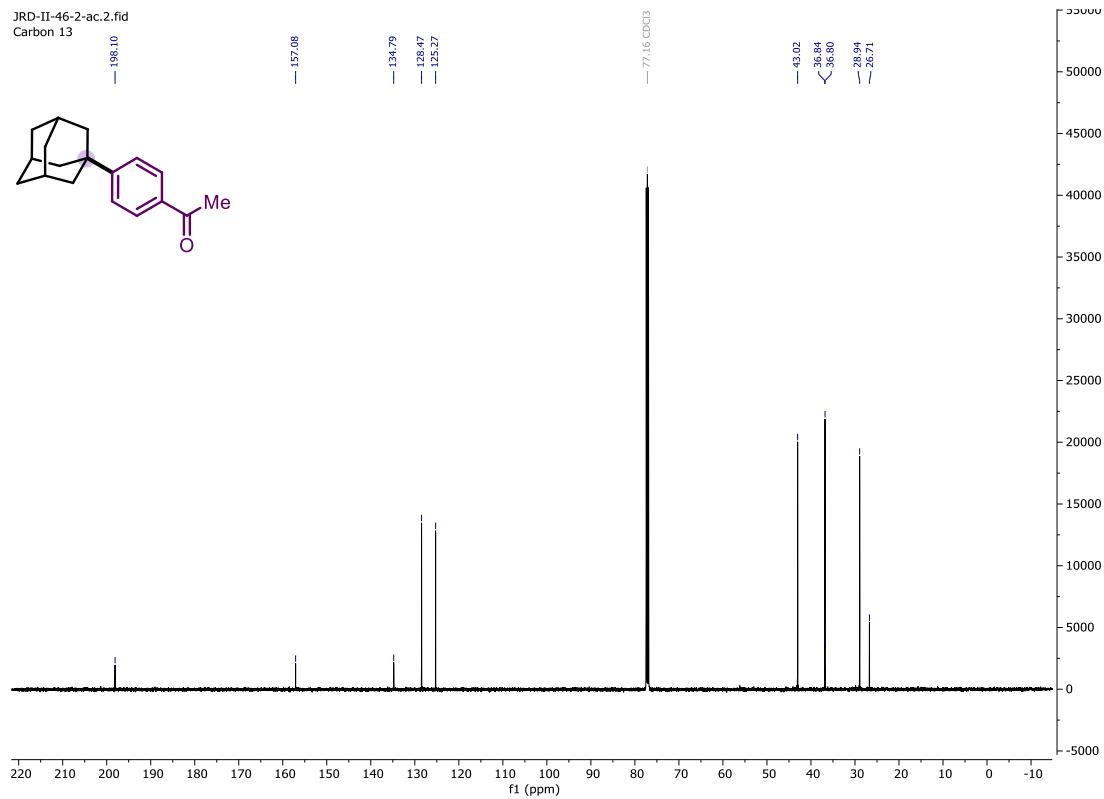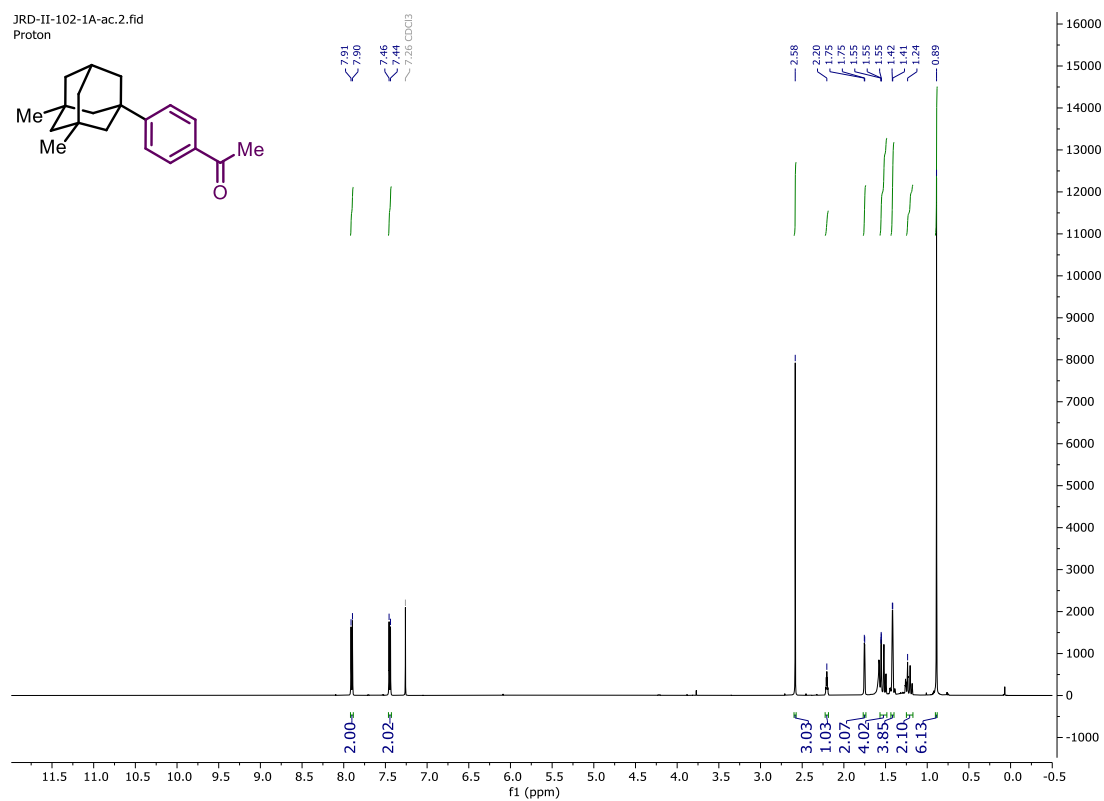

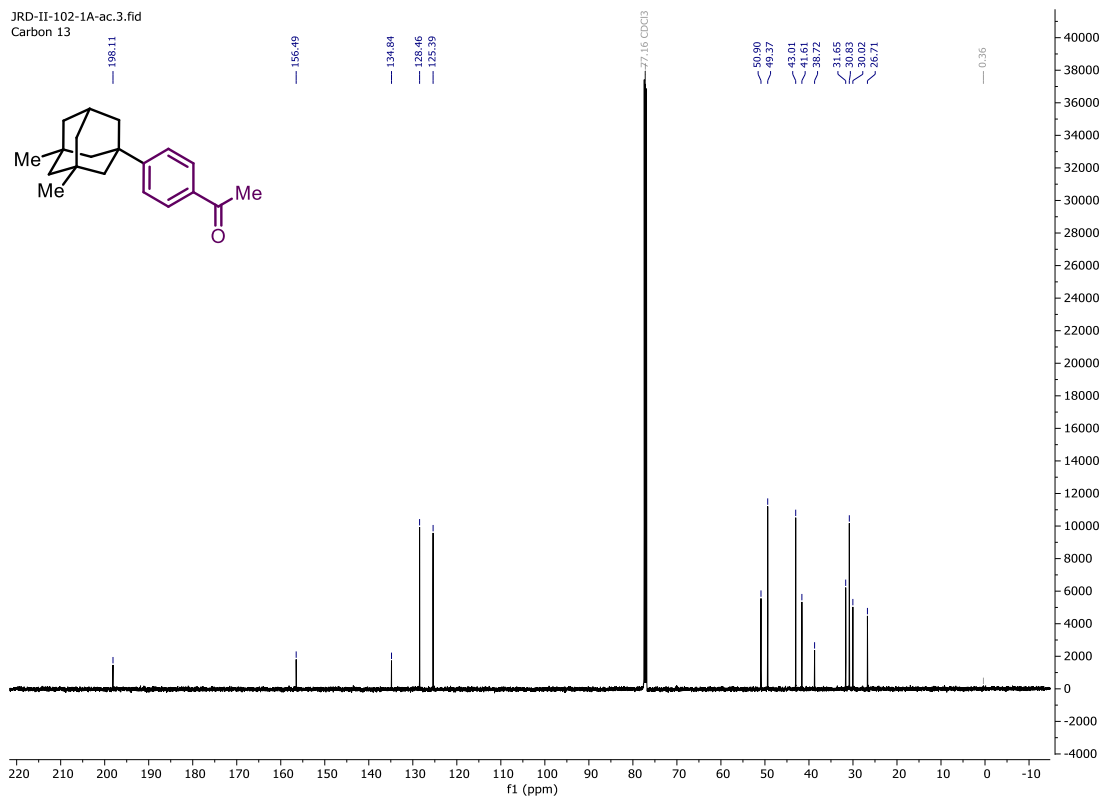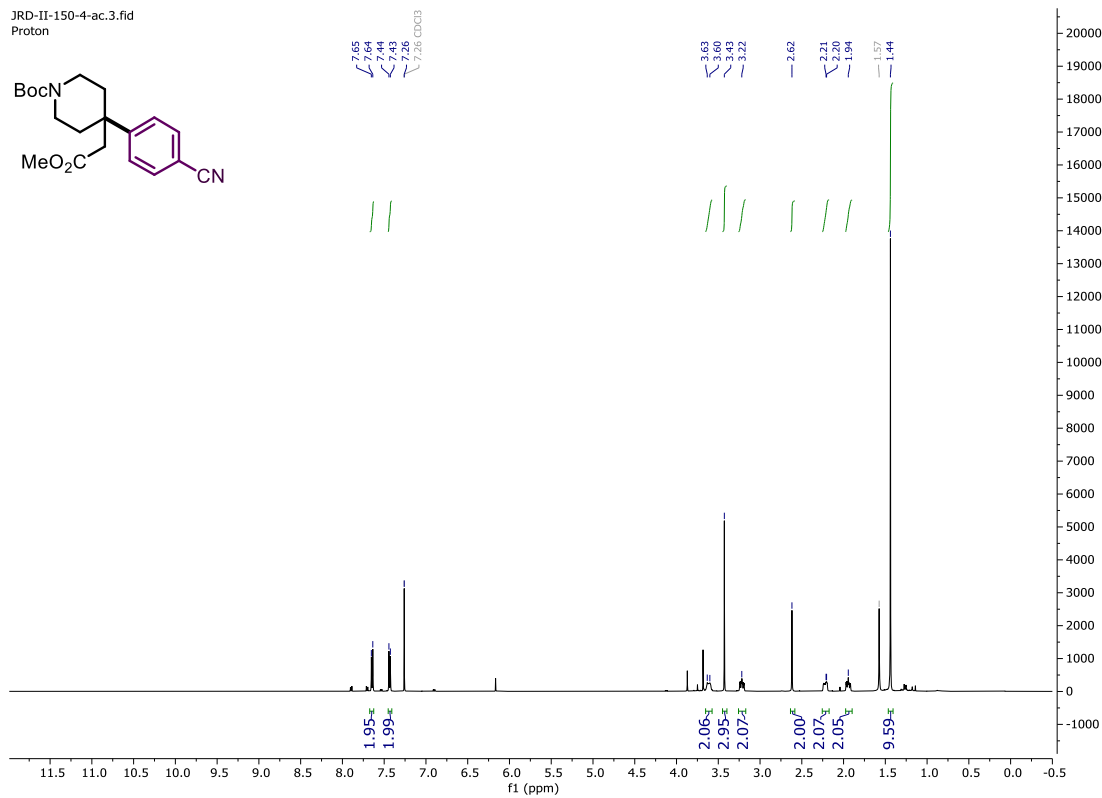

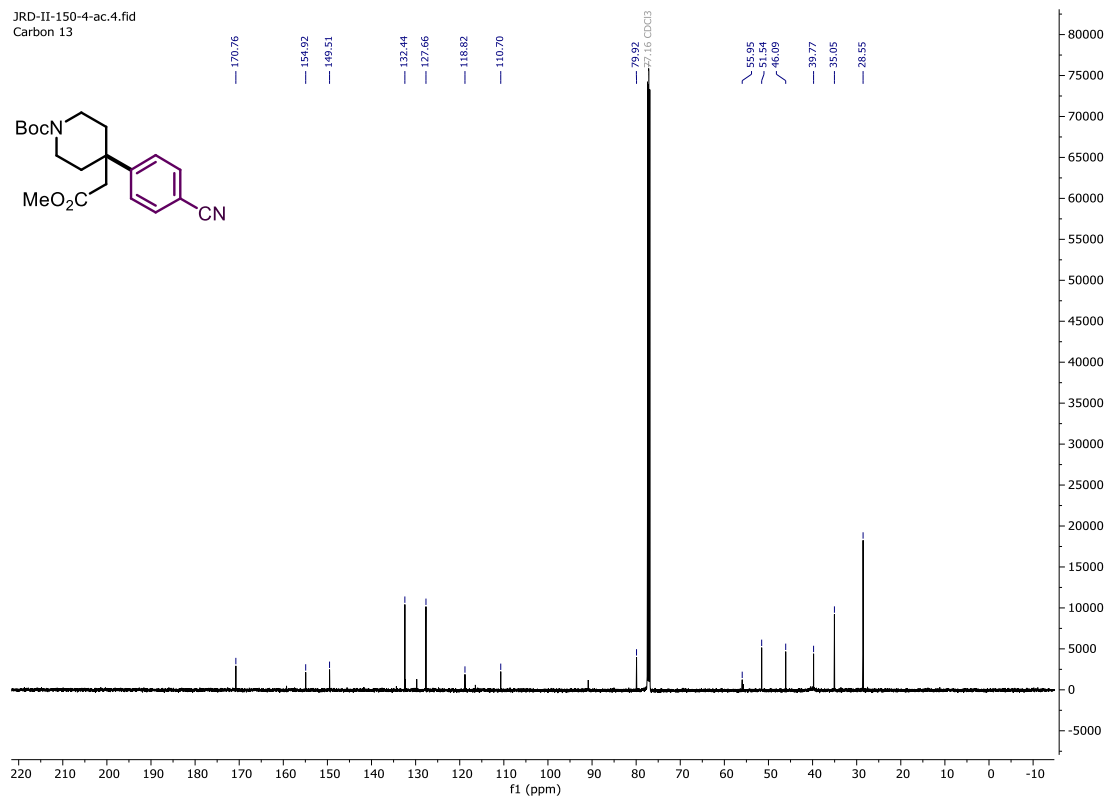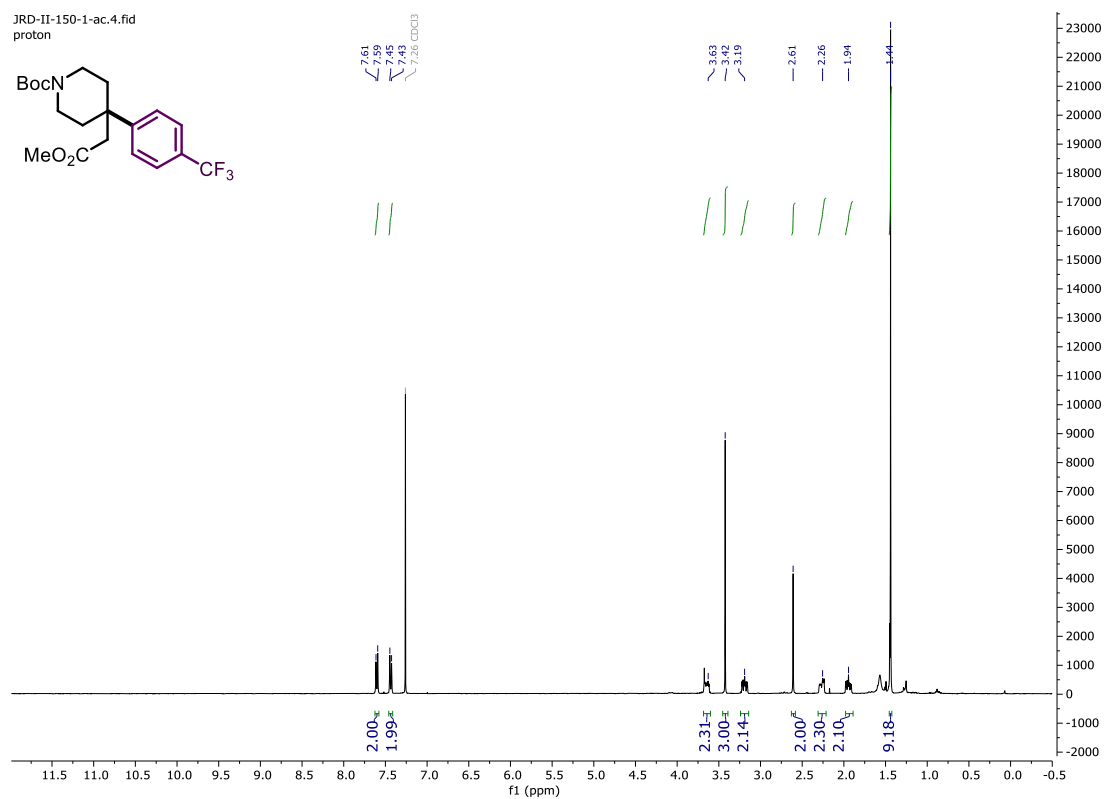

JRD-II-150-1-ac.6.fid

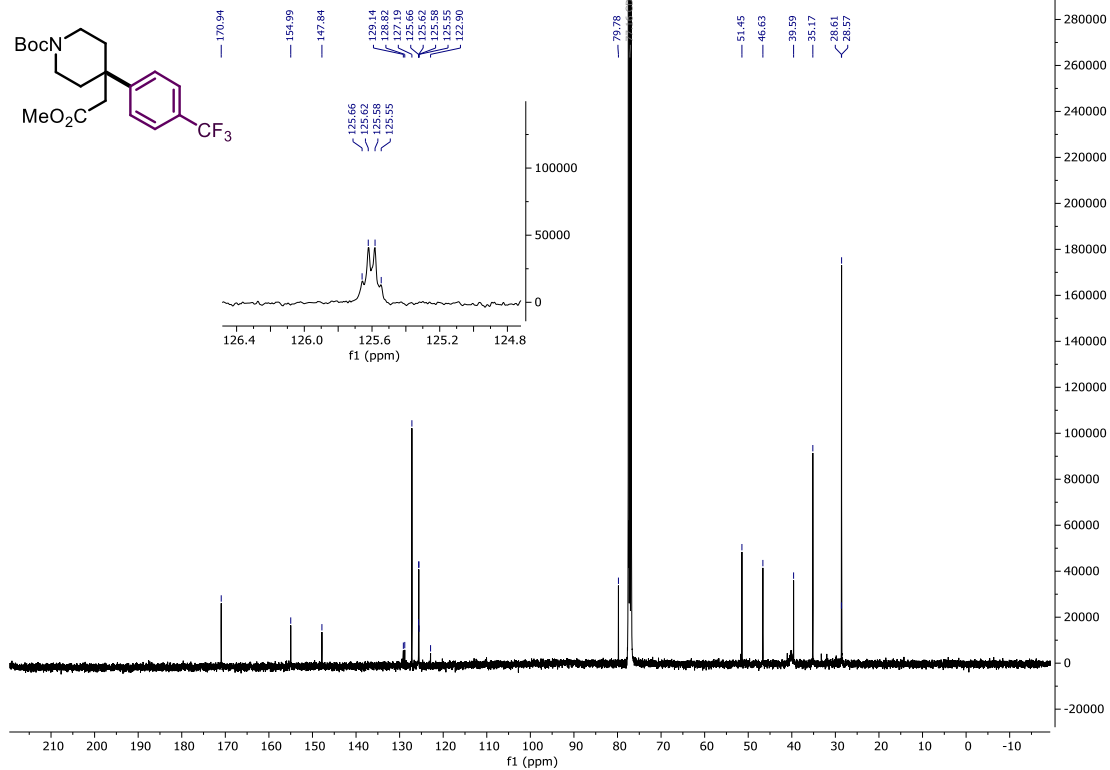

JRD-II-150-1-ac.5.fid  
F19

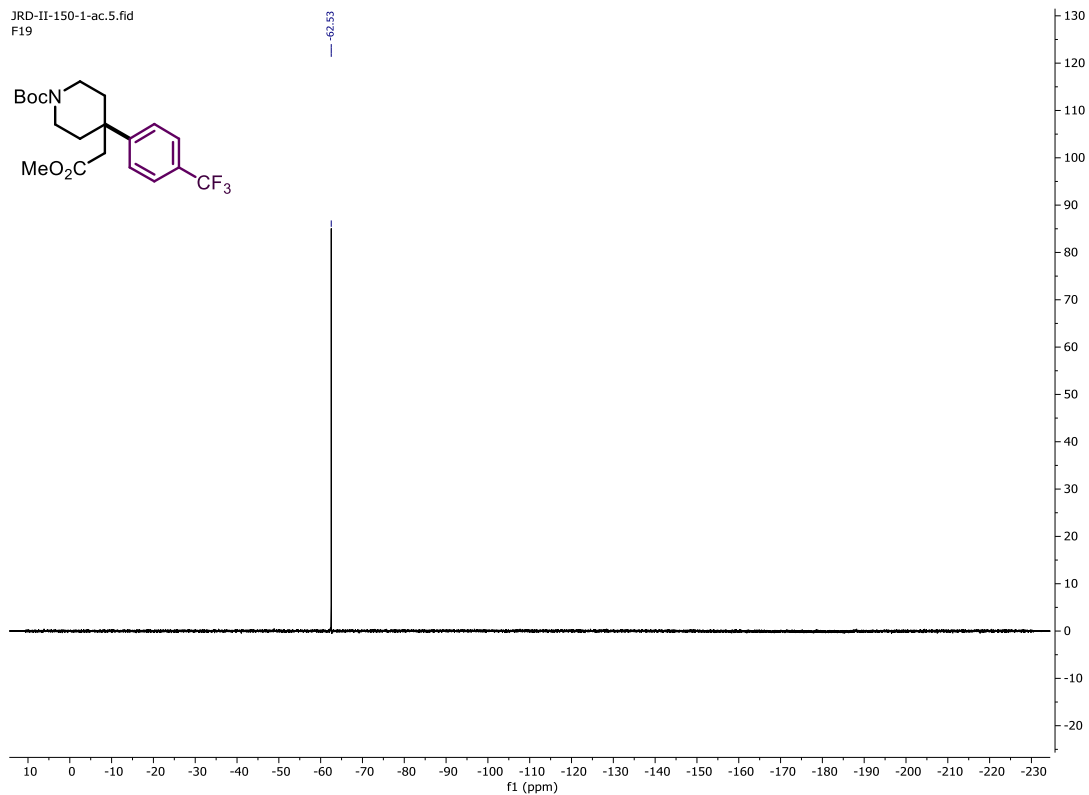

JRD-II-152-ac-fr16.1.fid  
proton

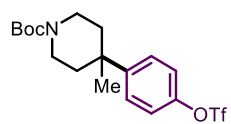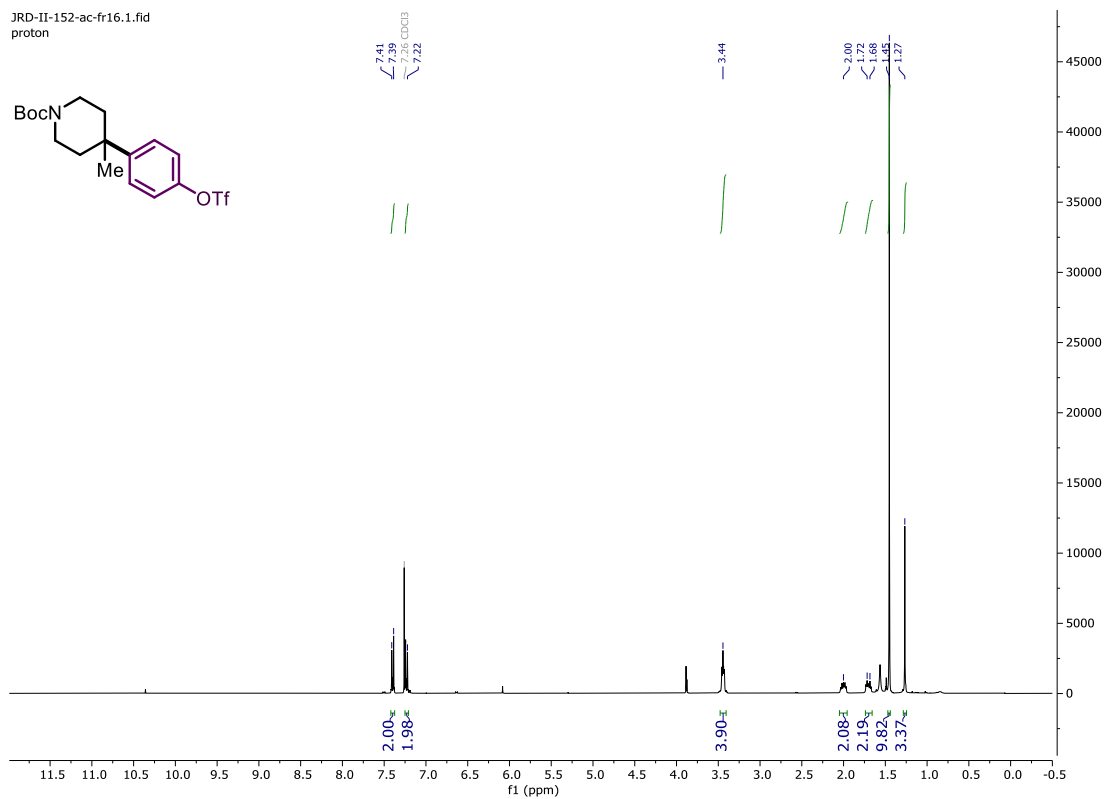

JRD-II-152-ac-fr16.3.fid

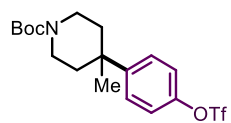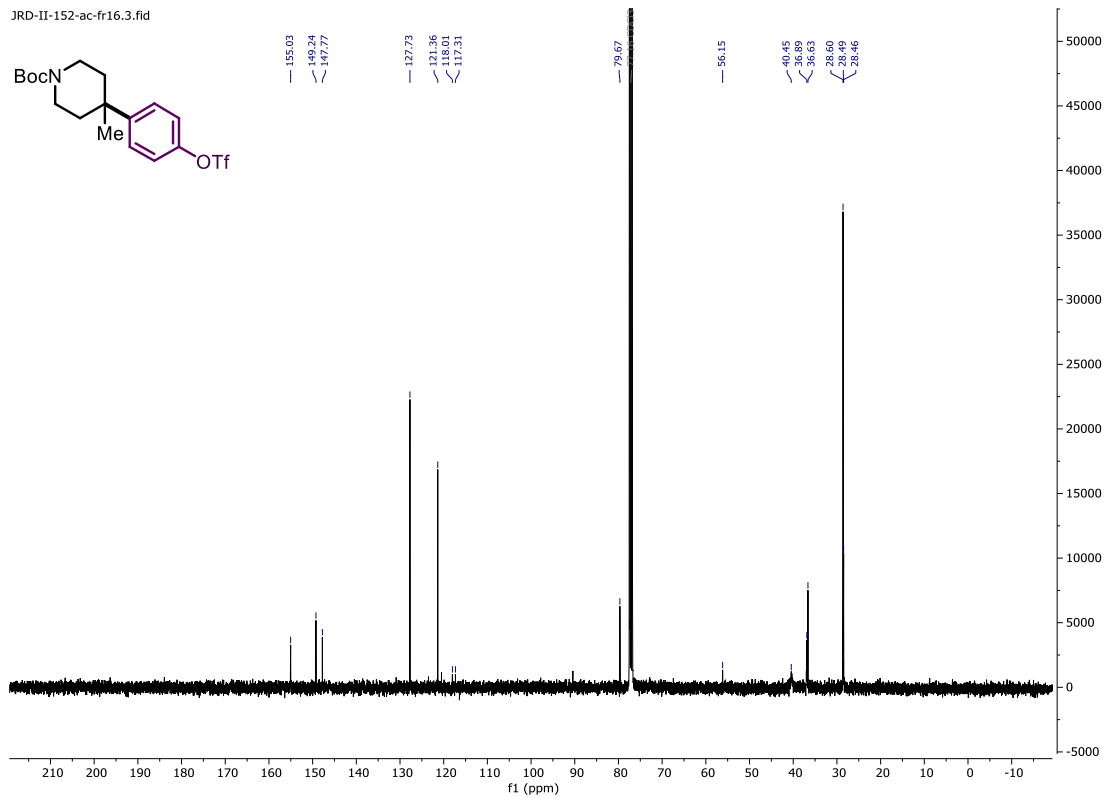

JRD-II-152-ac-fr16.2.fid  
F19

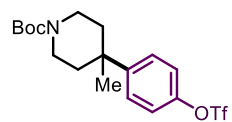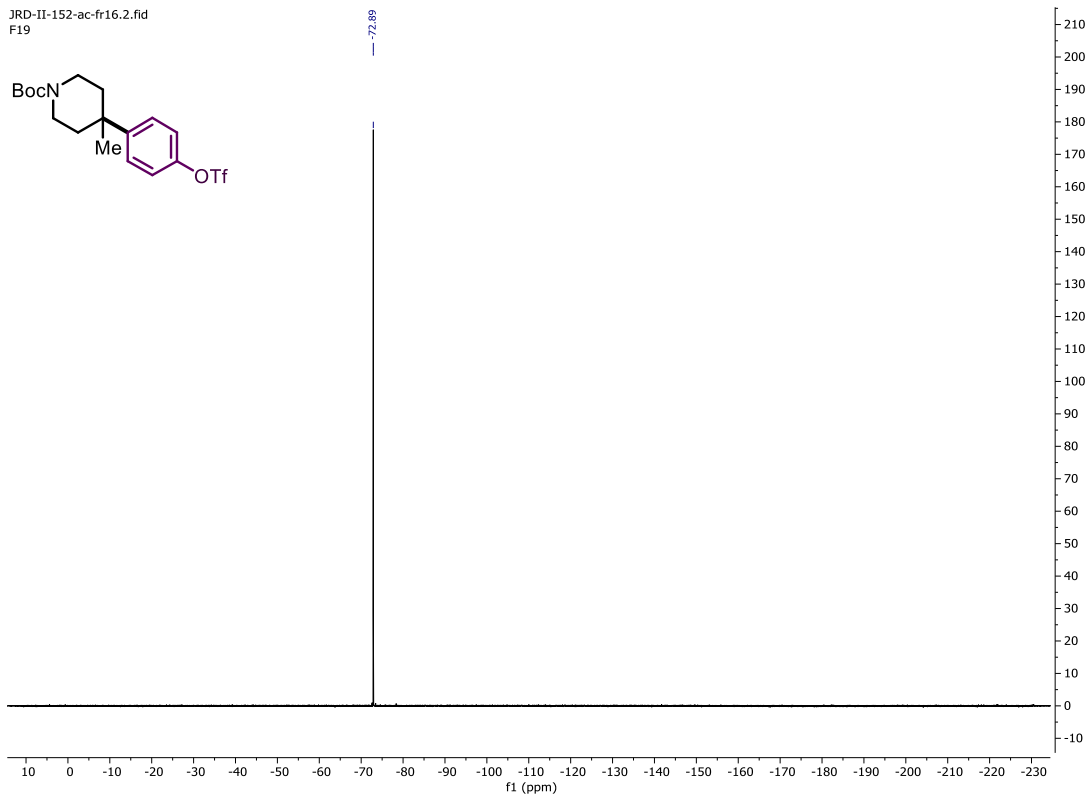

JRD-II-226-1-fr21.1.fid  
Proton

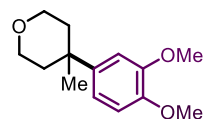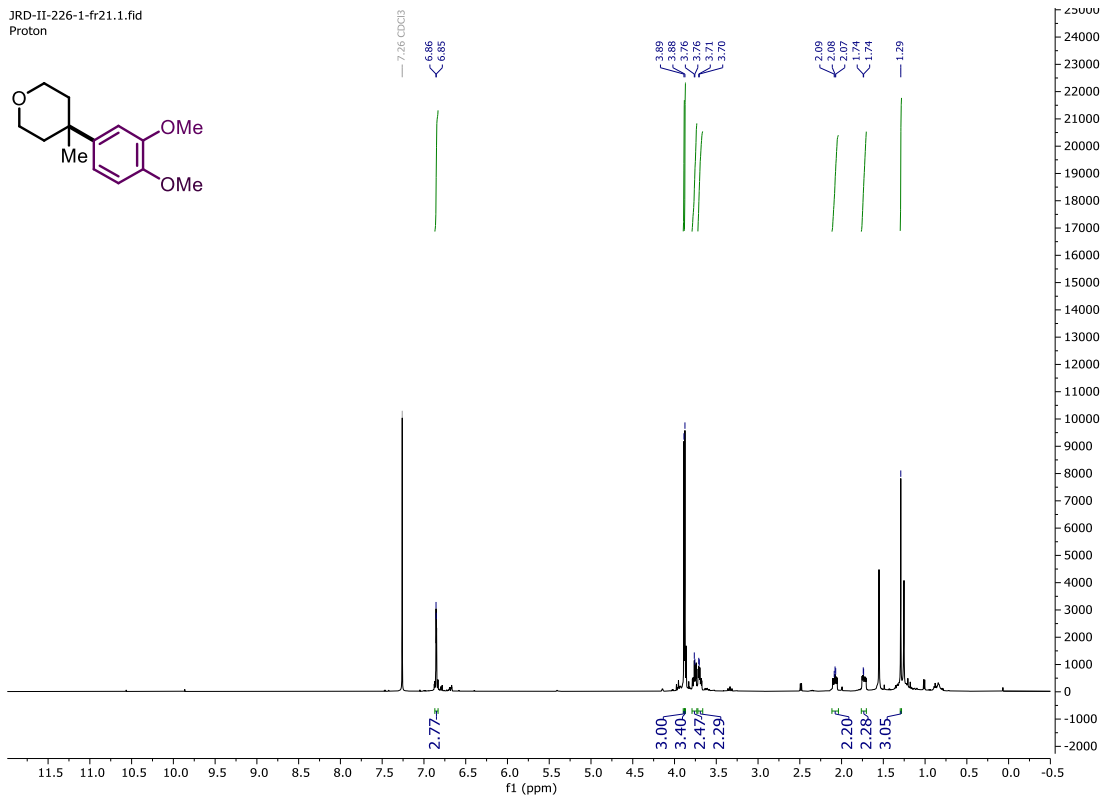



JRD-II-226-1-fr21.2.fid  
Carbon 13

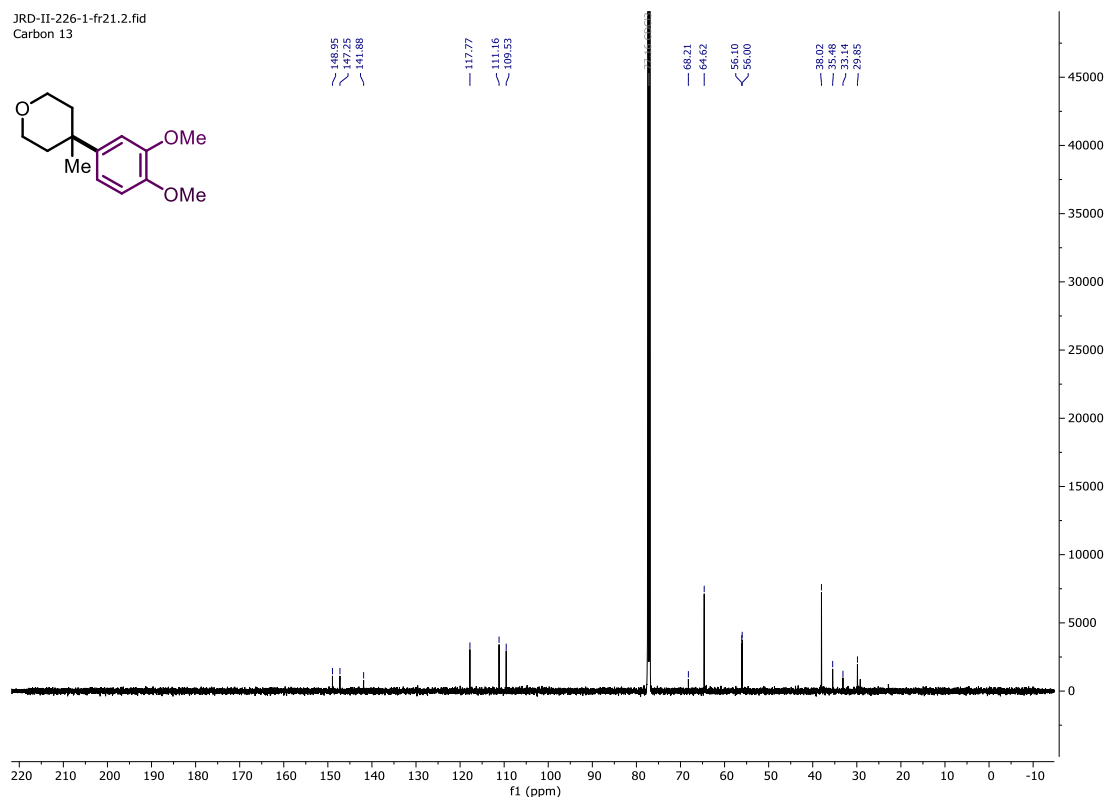

## 9. References

- (1) Ashley, M. A.; Rovis, T. Photoredox-Catalyzed Deaminative Alkylation via C–N Bond Activation of Primary Amines. *J. Am. Chem. Soc.* **2020**. <https://doi.org/10.1021/jacs.0c08595>.
- (2) Wright, S. W.; Ammirati, M. J.; Andrews, K. M.; Brodeur, A. M.; Danley, D. E.; Doran, S. D.; Lillquist, J. S.; McClure, L. D.; McPherson, R. K.; Orena, S. J.; Parker, J. C.; Polivkova, J.; Qiu, X.; Soeller, W. C.; Soglia, C. B.; Treadway, J. L.; VanVolkenburg, M. A.; Wang, H.; Wilder, D. C.; Olson, T. V. Cis-2,5-Dicyanopyrrolidine Inhibitors of Dipeptidyl Peptidase IV: Synthesis and in Vitro, in Vivo, and X-Ray Crystallographic Characterization. *J. Med. Chem.* **2006**, *49* (11), 3068–3076. <https://doi.org/10.1021/jm0600085>.
- (3) Su, B.; Bunescu, A.; Qiu, Y.; Zuend, S. J.; Ernst, M.; Hartwig, J. F. Palladium-Catalyzed Oxidation of  $\beta$ -C(Sp<sup>3</sup>)–H Bonds of Primary Alkylamines through a Rare Four-Membered Palladacycle Intermediate. *J. Am. Chem. Soc.* **2020**, *142* (17), 7912–7919. <https://doi.org/10.1021/jacs.0c01629>.
- (4) Geoghegan, K.; Bode, J. W. Bespoke SnAP Reagents for the Synthesis of C-Substituted Spirocyclic and Bicyclic Saturated N-Heterocycles. *Org. Lett.* **2015**, *17* (8), 1934–1937. <https://doi.org/10.1021/acs.orglett.5b00618>.
- (5) Primer, D. N.; Molander, G. A. Enabling the Cross-Coupling of Tertiary Organoboron Nucleophiles through Radical-Mediated Alkyl Transfer. *J. Am. Chem. Soc.* **2017**, *139* (29), 9847–9850. <https://doi.org/10.1021/jacs.7b06288>.
- (6) Wang, X.; Wang, S.; Xue, W.; Gong, H. Nickel-Catalyzed Reductive Coupling of Aryl Bromides with Tertiary Alkyl Halides. *J. Am. Chem. Soc.* **2015**, *137* (36), 11562–11565. <https://doi.org/10.1021/jacs.5b06255>.
- (7) Sun, Y.; Huang, X.; Li, X.; Luo, F.; Zhang, L.; Chen, M.; Zheng, S.; Peng, B. Mild Ring Contractions of Cyclobutanols to Cyclopropyl Ketones via Hypervalent Iodine Oxidation. *Adv. Synth. Catal.* **2018**, *360* (6), 1082–1087. <https://doi.org/10.1002/adsc.201701237>.
- (8) Green, S. A.; Vásquez-Céspedes, S.; Shenvi, R. A. Iron–Nickel Dual-Catalysis: A New Engine for Olefin Functionalization and the Formation of Quaternary Centers. *J. Am. Chem. Soc.* **2018**, *140* (36), 11317–11324. <https://doi.org/10.1021/jacs.8b05868>.

- (9) Feldmeier, C.; Bartling, H.; Riedle, E.; Gschwind, R. M. LED Based NMR Illumination Device for Mechanistic Studies on Photochemical Reactions – Versatile and Simple, yet Surprisingly Powerful. *J. Magn. Reson.* **2013**, *232*, 39–44. <https://doi.org/10.1016/j.jmr.2013.04.011>.
- (10) Lehnher, D.; Ji, Y.; Neel, A. J.; Cohen, R. D.; Brunskill, A. P. J.; Yang, J.; Reibarkh, M. Discovery of a Photoinduced Dark Catalytic Cycle Using in Situ LED-NMR Spectroscopy. *J. Am. Chem. Soc.* **2018**, *140* (42), 13843–13853. <https://doi.org/10.1021/jacs.8b08596>.
